# Supplementary material for: Global Trends and Burden of Infertility Attributable to Polycystic Ovary Syndrome, 1990–2021: A Comprehensive Analysis from the Global Burden of Disease Study
Source: Research Square preprint supplement (doi:10.21203/rs.3.rs-6881341/v1), 2025-07-19
Supplement: Supplementary file 1 [file 50e57acb92c646cf4b132f3c.docx]

| **eTable 1**: The prevalence of primary infertility due to PCOS and their AAPCs from 1990 to 2021 at the global and regional levels. | | | | | |  |
| --- | --- | --- | --- | --- | --- | --- |
|  | **Prevalence number (95% UI)** | | **ASPR, per 100,000 (95% UI)** | | **AAPC (95% CI)** | **p-value** |
|  | **1990** | **2021** | **1990** | **2021** |  |  |
| Global | 2074117(766046, 4112151) | 3452839(1013714, 7702491) | 148.68(54.54, 296.90) | 179.84(52.94, 399.91) | 0.62(0.6 to 0.63) | <0.001 |
| ***Socio-demographic index*** |  |  |  |  |  |  |
| High SDI | 785608(284271, 1603321) | 914345(274348, 1951881) | 342.18(123.73, 701.39) | 395.18(120.17, 840.01) | 0.45(0.43 to 0.48) | <0.001 |
| High-middle SDI | 328189(112156, 690783) | 453476(124303, 1088422) | 114.28(38.86, 241.39) | 167.60(46.93, 395.18) | 1.24(1.23 to 1.26) | <0.001 |
| Middle SDI | 587706(198936, 1231665) | 1158802(301480, 2708374) | 121.50(41.13, 257.17) | 194.71(50.68, 452.92) | 1.53(1.52 to 1.54) | <0.001 |
| Low-middle SDI | 300467(126845, 575644) | 706146(210537, 1561528) | 101.40(42.58, 196.82) | 135.88(40.37, 301.86) | 0.93(0.89 to 0.96) | <0.001 |
| Low SDI | 70553(25458, 144915) | 217451(70556, 466113) | 56.71(20.31, 118.14) | 72.97(23.81, 157.68) | 0.83(0.8 to 0.86) | <0.001 |
| ***Region*** |  |  |  |  |  |  |
| Andean Latin America | 13209(6142, 24201) | 33934(7825, 83984) | 136.78(64.47, 248.02) | 189.41(43.43, 470.47) | 0.96(0.72 to 1.09) | <0.001 |
| Australasia | 17245(4699, 42093) | 25157(6976, 60401) | 320.83(87.14, 784.96) | 358.53(99.03, 867.12) | 0.36(0.35 to 0.37) | <0.001 |
| Caribbean | 15156(5372, 31266) | 19530(5445, 44351) | 151.62(53.91, 315.24) | 164.18(45.42, 373.04) | 0.25(0.23 to 0.26) | <0.001 |
| Central Asia | 6792(1813, 15436) | 11282(2732, 27855) | 37.10(10.01, 84.46) | 48.35(11.50, 118.49) | 0.86(0.84 to 0.89) | <0.001 |
| Central Europe | 5293(982, 13885) | 4374(814, 11650) | 17.95(3.35, 46.72) | 20.00(3.60, 52.72) | 0.35(0.34 to 0.36) | <0.001 |
|  |  |  |  |  |  |  |
| Central Latin America | 101933(33258, 225042) | 155551(46187, 367938) | 228.72(74.95, 505.10) | 228.17(67.48, 540.83) | -0.02(-0.05 to 0) | 0.0372 |
| Central Sub-Saharan Africa | 5894(1318, 14031) | 23087(4198, 56551) | 41.90(9.59, 101.00) | 63.35(11.95, 156.98) | 1.4(1.3 to 1.5) | <0.001 |
| East Asia | 168137(23397, 476438) | 267149(44309, 762200) | 45.68(6.37, 130.76) | 96.40(15.45, 269.58) | 2.45(2.43 to 2.47) | <0.001 |
| Eastern Europe | 14473(3235, 34312) | 13856(2871, 34223) | 27.27(6.07, 63.60) | 33.76(7.09, 79.84) | 0.7(0.68 to 0.73) | <0.001 |
| Eastern Sub-Saharan Africa | 24485(9288, 49265) | 69039(20616, 152995) | 49.17(18.80, 100.11) | 57.36(17.40, 128.45) | 0.53(0.47 to 0.59) | <0.001 |
| High-income Asia Pacific | 139217(33955, 351777) | 110671(26556, 283057) | 319.17(78.19, 805.10) | 326.44(79.28, 838.45) | 0.07(0.06 to 0.08) | <0.001 |
| High-income North America | 314095(87909, 692315) | 404222(114516, 887976) | 407.68(114.26, 902.85) | 491.59(140.24, 1078.95) | 0.6(0.54 to 0.65) | <0.001 |
| North Africa and Middle East | 229626(115965, 400804) | 462718(142950, 1008588) | 272.93(137.70, 478.24) | 292.22(90.54, 635.16) | 0.22(0.19 to 0.26) | <0.001 |
| Oceania | 2038(428, 5132) | 5333(2037, 10694) | 120.85(25.64, 305.06) | 149.62(57.42, 299.76) | 0.69(0.67 to 0.7) | <0.001 |
| South Asia | 245680(82719, 495367) | 658771(172470, 1498775) | 88.98(29.33, 183.03) | 131.39(34.32, 299.68) | 1.26(1.21 to 1.32) | <0.001 |
| Southeast Asia | 247068(84156, 526342) | 545322(150423, 1287882) | 191.45(65.48, 411.77) | 302.30(83.39, 713.45) | 1.48(1.44 to 1.52) | <0.001 |
| Southern Latin America | 18691(5240, 44154) | 39968(11005, 93061) | 148.72(41.54, 351.13) | 231.44(63.96, 540.32) | 1.44(1.44 to 1.45) | <0.001 |
| Southern Sub-Saharan Africa | 13836(3597, 31184) | 24321(5026, 61718) | 93.66(24.70, 214.25) | 110.84(22.93, 280.96) | 0.61(0.55 to 0.66) | <0.001 |
| Tropical Latin America | 33654(8258, 75703) | 43751(10543, 104531) | 81.16(19.92, 184.11) | 74.47(17.67, 177.47) | -0.28(-0.3 to -0.25) | <0.001 |
| Western Europe | 434399(184264, 836336) | 446756(131066, 967890) | 446.29(188.55, 864.95) | 513.94(154.84, 1099.87) | 0.44(0.43 to 0.45) | <0.001 |
| Western Sub-Saharan Africa | 23196(8378, 47607) | 88045(22579, 204566) | 45.24(16.45, 93.56) | 64.33(16.64, 151.91) | 1.21(1.14 to 1.29) | <0.001 |

| ASPR, age-standardized prevalence rate; AAPC, average annual percentage change; UI, uncertainty interval, CI, confidence interval. |  |  |
| --- | --- | --- |

| **eTable 2**: The prevalence of secondary infertility due to PCOS and their AAPCs from 1990 to 2021 at the global and regional levels. | | | | | |  |
| --- | --- | --- | --- | --- | --- | --- |
|  | **Prevalence number (95% UI)** | | **ASPR, per 100,000 (95% UI)** | | **AAPC (95% CI)** | **p-value** |
|  | **1990** | **2021** | **1990** | **2021** |  |  |
| Global | 4241414(2075989, 7313059) | 9012694(4331151, 15261346) | 326.86(161.07, 61.56) | 458.30(219.74, 776.83) | 1.12(1.1 to 1.13) | <0.001 |
| ***Socio-demographic index*** |  |  |  |  |  |  |
| High SDI | 1403949(598924, 2569972) | 1927062(812634, 3426723) | 591.43(249.19, 1090.16) | 742.67(307.14, 1334.34) | 0.74(0.73 to 0.76) | <0.001 |
| High-middle SDI | 848178(435647, 1419497) | 1538967(762541, 2608901) | 305.90(156.43, 513.21) | 481.42(234.41, 822.33) | 1.5(1.48 to 1.51) | <0.001 |
| Middle SDI | 1339209(664152, 2277490) | 3344398(1612758, 5698513) | 308.36(155.55, 520.68) | 533.01(254.66, 912.19) | 1.79(1.78 to 1.81) | <0.001 |
| Low-middle SDI | 494253(247341, 861094) | 1636782(770523, 2823558) | 189.26(96.56, 326.07) | 324.49(153.39, 559.05) | 1.77(1.75 to 1.79) | <0.001 |
| Low SDI | 152927(76653, 263985) | 559283(287910, 947488) | 141.44(72.65, 242.05) | 207.28(108.66, 348.81) | 1.25(1.23 to 1.27)" | <0.001 |
| ***Region*** |  |  |  |  |  |  |
| Andean Latin America | 41067(23396, 65468) | 142130(51487, 261104) | 451.75(260.72, 715.93) | 799.28(289.13, 1471.49) | 2.01(1.78 to 2.2) | <0.001 |
| Australasia | 34880(9286, 77500) | 56166(15435, 123148) | 627.14(165.80, 1399.30) | 732.80(200.17, 1614.92) | 0.51(0.49 to 0.52) | <0.001 |
| Caribbean | 27320(13203, 48565) | 47030(23261, 83377) | 298.69(147.64, 525.60) | 390.11(192.61, 692.51) | 0.87(0.85 to 0.88) | <0.001 |
| Central Asia | 16479(7754, 29297) | 33898(16353, 59232) | 97.04(46.51, 171.91) | 136.28(64.48, 240.48) | 1.11(1.09 to 1.12) | <0.001 |
| Central Europe | 16707(7686, 30621) | 17418(8707, 30035) | 53.16(23.91, 98.30) | 67.40(32.16, 117.89) | 0.76(0.75 to 0.77) | <0.001 |
| Central Latin America | 249114(116649, 441560) | 533543(270085, 915166) | 622.09(299.73, 1089.25) | 780.13(393.95, 1340.42) | 0.72(0.68 to 0.75) | <0.001 |
| Central Sub-Saharan Africa | 16291(7608, 28982) | 65727(29991, 117526) | 136.74(66.34, 240.68) | 207.53(97.81, 367.51) | 1.38(1.35 to 1.42) | <0.001 |
| East Asia | 963743(507485, 1617327) | 1726394(901510, 2957751) | 292.00(154.36, 491.21) | 506.10(260.01, 872.22) | 1.8(1.77 to 1.82) | <0.001 |
| Eastern Europe | 31453(14226, 57739) | 36601(17137, 66022) | 53.69(23.60, 100.50) | 71.03(31.48, 131.96) | 0.92(0.9 to 0.93) | <0.001 |
| Eastern Sub-Saharan Africa | 64836(34731, 109635) | 215182(114247, 363248) | 154.84(84.92, 259.76) | 204.13(110.54, 342.05) | 0.91(0.88 to 0.94) | <0.001 |
| High-income Asia Pacific | 470643(178243, 884736) | 444727(164912, 832550) | 996.39(366.81, 1892.01) | 1069.76(380.67, 2040.51) | 0.25(0.23 to 0.28) | <0.001 |
| High-income North America | 417598(127680, 850680) | 648932(236858, 1225508) | 526.46(159.11, 1081.41) | 749.28(269.83, 1423.07) | 1.14(1.09 to 1.19) | <0.001 |
| North Africa and Middle East | 261356(129856, 457721) | 863318(364645, 1560892) | 347.95(176.58, 601.61) | 535.89(224.19, 973.07) | 1.41(1.36 to 1.44) | <0.001 |
| Oceania | 5395(2317, 99010) | 17046(9630, 28570) | 353.73(156.62, 641.25) | 488.01(275.66, 817.96) | 1.01(0.99 to 1.03) | <0.001 |
| South Asia | 380841(162243, 693368) | 1539646(699665, 2655515) | 155.81(68.27, 280.36) | 310.47(141.27, 535.78) | 2.27(2.23 to 2.3) | <0.001 |
| Southeast Asia | 454202(215550, 796597) | 1364407(641747, 2357364) | 391.84(189.01, 681.22) | 732.45(343.11, 1268.87) | 2.06(2.03 to 2.09) | <0.001 |
| Southern Latin America | 33723(13259, 64584) | 77169(31224, 145849) | 276.54(109.67, 527.60) | 429.64(172.29, 815.10) | 1.47(1.44 to 1.49) | <0.001 |
| Southern Sub-Saharan Africa | 31085(14663, 54794) | 64527(28796, 114929) | 239.52(116.74, 416.72) | 291.01(129.06, 520.55) | 0.64(0.62 to 0.67) | <0.001 |
| Tropical Latin America | 49982(19067, 98269) | 91507(38379, 170183) | 127.15(49.73, 248.59) | 146.70(59.97, 276.09) | 0.51(0.46 to 0.58) | <0.001 |
| Western Europe | 610592(281665, 1086313) | 771424(309542, 1394028) | 16.35(283.40, 1099.51) | 761.87(299.12, 1393.84) | 0.72(0.7 to 0.74) | <0.001 |
| Western Sub-Saharan Africa | 64107(33367, 108951) | 255902(125754, 445553) | 151.49(81.07, 254.33) | 219.51(111.34, 377.30) | 1.2(1.18 to 1.23) | <0.001 |
| ASPR, age-standardized prevalence rate; AAPC, average annual percentage change; UI, uncertainty interval, CI, confidence interval. | | | | |  |  |
|  |  |  |  |  |  |  |

| **eTable 3**: The prevalence of infertility due to PCOS and their AAPCs from 1990 to 2021 in different countries. | | | | | | | | | |  |
| --- | --- | --- | --- | --- | --- | --- | --- | --- | --- | --- |
| Location | Type | ASPR, per 100,000 | | | | | | AAPC | | |
| 1990 | | | 2021 | | | value | upper | lower |
| value | upper | lower | value | upper | lower |
| Afghanistan | Infertility | 364.9271324 | 598.7982359 | 218.1352967 | 503.8713701 | 786.5578673 | 309.5543687 | 1.090043553 | 1.11559062 | 1.060595364 |
| Albania | Infertility | 54.86340617 | 95.63134871 | 29.32062765 | 67.51674632 | 114.9261936 | 36.84641373 | 0.690959381 | 0.714451564 | 0.667189938 |
| Algeria | Infertility | 597.792559 | 961.1126108 | 356.5447179 | 877.24603 | 1432.632666 | 490.0628876 | 1.262115801 | 1.28538939 | 1.247159859 |
| American Samoa | Infertility | 744.3696823 | 1237.390463 | 421.666852 | 1007.575179 | 1672.990246 | 582.9023172 | 0.964665978 | 0.981162327 | 0.944824005 |
| Andorra | Infertility | 1002.079779 | 1636.381281 | 550.8250969 | 1208.330811 | 1989.064034 | 657.7658536 | 0.611004277 | 0.619083267 | 0.60171297 |
| Angola | Infertility | 165.48421 | 278.8528421 | 97.9108829 | 299.9360775 | 490.9682367 | 174.4290453 | 1.965713257 | 1.996159503 | 1.932513484 |
| Antigua and Barbuda | Infertility | 453.9884368 | 728.9853645 | 257.6401489 | 597.2652404 | 986.611828 | 340.0354746 | 0.883424375 | 0.903568739 | 0.862056355 |
| Argentina | Infertility | 417.4790265 | 708.6836162 | 241.7294473 | 628.6764664 | 1053.227689 | 364.8768237 | 1.347384498 | 1.37274116 | 1.324639994 |
| Armenia | Infertility | 122.8622646 | 202.2716839 | 69.08300067 | 164.239084 | 274.4078025 | 93.1758858 | 0.943694363 | 0.970496418 | 0.913667187 |
| Australia | Infertility | 897.4907132 | 1726.332069 | 327.9052001 | 1016.770312 | 2000.50009 | 373.7589603 | 0.401385304 | 0.41844698 | 0.383475733 |
| Austria | Infertility | 1368.421957 | 2189.795811 | 808.5170574 | 1447.19758 | 2335.487167 | 833.5759436 | 0.146841626 | 0.169781399 | 0.127742921 |
| Azerbaijan | Infertility | 127.3180506 | 208.6749685 | 75.36773225 | 196.5337741 | 316.5041354 | 114.5891935 | 1.414890838 | 1.432344086 | 1.392699082 |
| Bahamas | Infertility | 567.9152029 | 934.1624608 | 324.2168653 | 672.3333222 | 1128.613068 | 382.2880863 | 0.559306583 | 0.569002102 | 0.548317609 |
| Bahrain | Infertility | 839.1756137 | 1347.899346 | 480.9641968 | 954.8966461 | 1539.916355 | 552.2327998 | 0.442383781 | 0.470209059 | 0.425399552 |
| Bangladesh | Infertility | 145.3324342 | 235.2465396 | 88.38933434 | 232.3878535 | 369.4392252 | 141.0970449 | 1.50406285 | 1.530745364 | 1.476748545 |
| Barbados | Infertility | 561.7782545 | 926.5353341 | 319.5812269 | 657.2851694 | 1068.953806 | 377.456213 | 0.519545783 | 0.535593345 | 0.505034952 |
| Belarus | Infertility | 78.10297363 | 131.7881439 | 43.33295932 | 104.299742 | 175.3043164 | 59.41303404 | 0.963502677 | 0.99065361 | 0.944228981 |
| Belgium | Infertility | 1074.791047 | 1716.409365 | 640.2161408 | 1305.916015 | 2119.15344 | 779.0331199 | 0.66682274 | 0.696516249 | 0.634626074 |
| Belize | Infertility | 434.6400311 | 702.188229 | 255.7465159 | 615.7379211 | 1003.449498 | 354.3877874 | 1.147901203 | 1.176547951 | 1.118516168 |
| Benin | Infertility | 178.1207854 | 292.1366691 | 102.552625 | 321.3158107 | 508.3994804 | 193.8804266 | 1.915825488 | 1.945245867 | 1.885039952 |
| Bermuda | Infertility | 673.6137556 | 1125.987609 | 377.3173079 | 746.4271623 | 1261.147994 | 417.2705201 | 0.342426508 | 0.367045573 | 0.31985645 |
| Bhutan | Infertility | 209.3718697 | 339.4455926 | 124.233624 | 368.3211412 | 591.3907685 | 214.2224105 | 1.853430134 | 1.869792916 | 1.834755677 |
| Bolivia (Plurinational State of) | Infertility | 623.9010921 | 985.536942 | 367.5074613 | 895.4524926 | 1534.482535 | 401.8669995 | 1.194286081 | 1.243859796 | 1.140200312 |
| Bosnia and Herzegovina | Infertility | 46.83483651 | 82.39549588 | 24.40961604 | 72.54339505 | 124.7734223 | 39.30817552 | 1.458282995 | 1.491122034 | 1.429494192 |
| Botswana | Infertility | 251.5538164 | 400.9083085 | 148.7176361 | 404.7471883 | 658.8964398 | 226.0167176 | 1.545213975 | 1.578038537 | 1.513331379 |
| Brazil | Infertility | 209.5864822 | 344.9096133 | 117.7014158 | 220.5154088 | 357.6039486 | 125.2130667 | 0.119821623 | 0.164035029 | 0.07387022 |
| Brunei Darussalam | Infertility | 673.9738521 | 1275.218072 | 270.0053708 | 951.3082051 | 1807.083487 | 369.1558356 | 1.144743435 | 1.165334357 | 1.125867664 |
| Bulgaria | Infertility | 64.79274229 | 111.8560593 | 34.97384783 | 82.68309652 | 140.168323 | 45.28845009 | 0.794580995 | 0.804601303 | 0.784910093 |
| Burkina Faso | Infertility | 164.9158272 | 268.3863344 | 99.40398171 | 269.2214344 | 441.7936137 | 154.3778128 | 1.600734221 | 1.633544391 | 1.564018523 |
| Burundi | Infertility | 168.8363076 | 271.725561 | 100.2727829 | 169.6864395 | 275.343454 | 101.5926132 | 0.021879488 | 0.03288559 | 0.008274105 |
| Cabo Verde | Infertility | 199.0802421 | 328.2282221 | 118.7108147 | 333.5522071 | 541.6467691 | 199.6903711 | 1.683596931 | 1.711118927 | 1.657686776 |
| Cambodia | Infertility | 441.0352332 | 745.4190277 | 256.4963309 | 741.6498087 | 1230.320254 | 430.43951 | 1.730677147 | 1.787268789 | 1.681850518 |
| Cameroon | Infertility | 272.8003925 | 433.5793456 | 163.7619887 | 371.5610591 | 607.107497 | 217.9785205 | 1.022486603 | 1.060341771 | 0.98806129 |
| Canada | Infertility | 483.9043165 | 809.1247888 | 260.8615728 | 606.5917957 | 1015.327731 | 320.0863544 | 0.734837553 | 0.74209471 | 0.726820564 |
| Central African Republic | Infertility | 217.4977586 | 357.2865223 | 127.7973163 | 239.7712616 | 385.9079044 | 141.9674495 | 0.332905981 | 0.361239359 | 0.310847038 |
| Chad | Infertility | 132.2150335 | 219.3829892 | 72.69165084 | 205.317894 | 341.1531334 | 120.8525376 | 1.415846958 | 1.450827677 | 1.380300956 |
| Chile | Infertility | 441.8544816 | 741.8766276 | 257.1900951 | 736.8489411 | 1233.194007 | 422.5885813 | 1.662757577 | 1.676052613 | 1.649811403 |
| China | Infertility | 333.4402122 | 540.446361 | 191.5192192 | 601.7275139 | 988.4753281 | 342.105349 | 1.927185199 | 1.94849521 | 1.902696956 |
| Colombia | Infertility | 537.063667 | 837.6839398 | 326.736852 | 693.6240347 | 1061.365436 | 433.8778499 | 0.833741614 | 0.858265235 | 0.807982152 |
| Comoros | Infertility | 261.0017127 | 432.9279781 | 154.2812951 | 310.7513712 | 507.1225896 | 185.3813311 | 0.572358403 | 0.583385102 | 0.560872745 |
| Congo | Infertility | 228.4255845 | 376.2892056 | 132.9110084 | 318.3500551 | 523.67698 | 180.8727486 | 1.080543979 | 1.102928524 | 1.053650463 |
| Cook Islands | Infertility | 769.5048254 | 1295.370359 | 441.0602639 | 1112.148038 | 1849.262412 | 645.0730462 | 1.188865946 | 1.210781479 | 1.160931874 |
| Costa Rica | Infertility | 740.5184157 | 1251.403601 | 416.8162064 | 958.4367367 | 1572.025231 | 554.8085416 | 0.845583079 | 0.856870274 | 0.836223567 |
| Coted'Ivoire | Infertility | 183.6744878 | 298.4306544 | 111.7556316 | 308.9140722 | 501.4132258 | 184.5501758 | 1.70574754 | 1.733445112 | 1.677903353 |
| Croatia | Infertility | 59.54284097 | 103.4112242 | 32.08589771 | 79.70835048 | 135.7015605 | 42.80142692 | 0.961005057 | 0.973367435 | 0.949951682 |
| Cuba | Infertility | 495.1545114 | 804.2167939 | 281.8095502 | 647.2671993 | 1073.538858 | 370.0590788 | 0.871867816 | 0.882749334 | 0.861181783 |
| Cyprus | Infertility | 820.9985115 | 1340.868807 | 465.5461273 | 1137.995357 | 1865.663523 | 616.6471812 | 1.057284426 | 1.082988235 | 1.032900394 |
| Czechia | Infertility | 62.5021687 | 106.823598 | 33.73581167 | 80.03028834 | 133.7599542 | 44.29830331 | 0.831285108 | 0.860872816 | 0.804816367 |
| Democratic People's Republic of Korea | Infertility | 340.16224 | 564.5648622 | 192.0518308 | 380.7456077 | 638.0211719 | 216.9469502 | 0.34785904 | 0.358510946 | 0.337442011 |
| Democratic Republic of the Congo | Infertility | 173.6317021 | 290.1123926 | 99.60469997 | 253.0812792 | 416.8320305 | 144.1498182 | 1.239688068 | 1.299799376 | 1.181091202 |
| Denmark | Infertility | 664.1160103 | 1173.290333 | 345.1787873 | 953.1079801 | 1645.516295 | 459.1826553 | 1.169616064 | 1.203565381 | 1.141222887 |
| Djibouti | Infertility | 208.7112146 | 344.7918112 | 123.4971155 | 355.4611617 | 590.6383605 | 213.96614 | 1.749450164 | 1.766153228 | 1.731560708 |
| Dominica | Infertility | 450.1048071 | 740.645924 | 255.3430096 | 609.0841301 | 1007.0843 | 335.424835 | 0.983698282 | 1.001095608 | 0.967992867 |
| Dominican Republic | Infertility | 379.9161335 | 600.3064928 | 224.9280025 | 599.8158197 | 996.8885162 | 337.579239 | 1.50177038 | 1.516384796 | 1.485635768 |
| Ecuador | Infertility | 804.4114992 | 1209.958651 | 497.0524898 | 1049.886583 | 1820.99176 | 448.3592661 | 0.852850214 | 0.910081707 | 0.78344098 |
| Egypt | Infertility | 745.81655 | 1181.971639 | 452.2971507 | 921.8377951 | 1503.284697 | 527.4016661 | 0.732119316 | 0.791874751 | 0.68293336 |
| El Salvador | Infertility | 581.0236591 | 941.9344262 | 344.6648614 | 787.0462583 | 1309.294102 | 444.8697771 | 1.015140111 | 1.042556623 | 0.987480937 |
| Equatorial Guinea | Infertility | 190.3712237 | 314.0511011 | 111.9871254 | 442.6589805 | 714.8248064 | 251.6730407 | 2.773522807 | 2.825581474 | 2.731800033 |
| Eritrea | Infertility | 152.7655896 | 248.290789 | 92.59933874 | 233.4464929 | 382.337266 | 137.8963394 | 1.398272648 | 1.422887949 | 1.374962672 |
| Estonia | Infertility | 83.13088404 | 139.8521655 | 45.72698505 | 118.2723688 | 200.4908957 | 66.70260599 | 1.166230935 | 1.190017734 | 1.141074689 |
| Eswatini | Infertility | 332.3870525 | 558.8926503 | 180.9894647 | 409.3230835 | 667.8873227 | 228.6053424 | 0.712576323 | 0.748283123 | 0.682851368 |
| Ethiopia | Infertility | 154.3455825 | 250.8042846 | 92.24149423 | 235.0779095 | 385.9934539 | 137.5789181 | 1.378943832 | 1.397266038 | 1.356504404 |
| Fiji | Infertility | 622.5960357 | 1041.451617 | 352.5458292 | 928.1769322 | 1581.573604 | 532.8570417 | 1.281579453 | 1.288549897 | 1.273090017 |
| Finland | Infertility | 817.1727435 | 1323.011467 | 479.0036133 | 1098.976659 | 1825.807825 | 600.8747845 | 0.958834503 | 0.97340972 | 0.945989803 |
| France | Infertility | 933.1053982 | 1489.351085 | 549.2763372 | 1174.375448 | 1936.782946 | 673.5490032 | 0.741170752 | 0.746301562 | 0.73402446 |
| Gabon | Infertility | 265.863998 | 428.9721396 | 155.268824 | 400.4562721 | 652.2658624 | 233.4006371 | 1.355346064 | 1.390393844 | 1.323460332 |
| Gambia | Infertility | 186.54021 | 305.307972 | 110.8256746 | 279.4443436 | 455.4586399 | 163.669088 | 1.32949707 | 1.360705318 | 1.299402607 |
| Georgia | Infertility | 157.8094184 | 259.715463 | 89.4217659 | 270.4482052 | 441.8233235 | 149.5363292 | 1.777691752 | 1.809482769 | 1.74130572 |
| Germany | Infertility | 742.8203261 | 1233.539264 | 409.3661337 | 966.981295 | 1624.448783 | 495.4926817 | 0.867508582 | 0.883702442 | 0.852117636 |
| Ghana | Infertility | 190.0203159 | 307.8282409 | 116.3813845 | 287.2172841 | 467.5999209 | 170.0733848 | 1.367775589 | 1.447319376 | 1.292011229 |
| Greece | Infertility | 1002.718209 | 1628.186103 | 547.3527026 | 1201.549854 | 1955.088464 | 657.7558536 | 0.586606039 | 0.595180432 | 0.578343093 |
| Greenland | Infertility | 415.3187273 | 696.4347974 | 225.0916026 | 540.8618457 | 900.6128562 | 290.1467079 | 0.871350648 | 0.882629279 | 0.859061258 |
| Grenada | Infertility | 390.6192666 | 635.3906618 | 220.6429268 | 552.5323225 | 906.1297978 | 313.9076221 | 1.142605197 | 1.163836354 | 1.122826455 |
| Guam | Infertility | 818.632166 | 1377.597933 | 461.9129355 | 1122.392399 | 1874.09245 | 656.716361 | 1.018587274 | 1.038373279 | 0.99881732 |
| Guatemala | Infertility | 507.1120017 | 809.3116605 | 303.9535925 | 727.0865523 | 1220.951193 | 412.6424636 | 1.118950489 | 1.180422475 | 1.028717082 |
| Guinea | Infertility | 168.3754881 | 276.3202955 | 98.6019897 | 254.9013869 | 409.8527182 | 156.3953955 | 1.342333524 | 1.367676872 | 1.317654648 |
| Guinea-Bissau | Infertility | 165.5142975 | 279.514304 | 93.65225294 | 255.0984787 | 424.3841141 | 151.4181828 | 1.417206379 | 1.447250816 | 1.388455316 |
| Guyana | Infertility | 410.6685344 | 662.5510492 | 236.367699 | 587.5637339 | 961.6670558 | 334.9737882 | 1.189284302 | 1.225180017 | 1.152875221 |
| Haiti | Infertility | 306.7708268 | 494.0061489 | 184.9171763 | 366.6733279 | 583.253921 | 217.9984013 | 0.587101158 | 0.598396565 | 0.57516625 |
| Honduras | Infertility | 499.5244657 | 831.4212012 | 289.646566 | 733.6295705 | 1213.488204 | 420.7604374 | 1.245560265 | 1.264678762 | 1.224079522 |
| Hungary | Infertility | 65.71965094 | 110.9185017 | 34.9854116 | 81.03062882 | 137.4484878 | 44.31433096 | 0.683804177 | 0.695361479 | 0.671396462 |
| Iceland | Infertility | 1039.077009 | 1693.163518 | 575.8261985 | 1268.701613 | 2054.940014 | 698.7270367 | 0.6476895 | 0.659016441 | 0.635617788 |
| India | Infertility | 257.0339907 | 399.5432819 | 160.0469934 | 496.1142833 | 777.0455808 | 304.6362572 | 2.180696461 | 2.206372632 | 2.148645729 |
| Indonesia | Infertility | 603.2628846 | 982.6150789 | 346.768683 | 1096.943752 | 1797.368303 | 631.4792997 | 1.951328616 | 1.975689173 | 1.920473047 |
| Iran (Islamic Republic of) | Infertility | 663.6295232 | 1070.999155 | 389.9153878 | 869.5133119 | 1389.5818 | 502.9120557 | 0.885117006 | 0.917343006 | 0.849697953 |
| Iraq | Infertility | 708.5124641 | 1155.823495 | 412.0269995 | 814.412624 | 1318.359501 | 464.5191528 | 0.468548797 | 0.492398221 | 0.449116732 |
| Ireland | Infertility | 970.9983375 | 1589.429863 | 530.9635448 | 1177.766799 | 1938.376975 | 644.9990865 | 0.630666791 | 0.643920281 | 0.614966394 |
| Israel | Infertility | 813.3736368 | 1364.83371 | 446.4305908 | 1041.870567 | 1743.226576 | 556.3278112 | 0.79867332 | 0.809011646 | 0.788456231 |
| Italy | Infertility | 2089.652419 | 3673.852468 | 962.8236324 | 2345.395631 | 3818.991805 | 1203.359217 | 0.381512418 | 0.405840193 | 0.355609169 |
| Jamaica | Infertility | 444.8752414 | 711.3999136 | 252.23937 | 592.3365869 | 973.7642938 | 340.3279942 | 0.941906145 | 0.960624349 | 0.922058221 |
| Japan | Infertility | 1626.576617 | 2831.839639 | 729.1681899 | 1700.923699 | 2952.998214 | 751.1182571 | 0.176302412 | 0.196346593 | 0.157760418 |
| Jordan | Infertility | 646.5329082 | 1028.20581 | 387.7420414 | 816.9552073 | 1278.643654 | 490.3112078 | 0.767961689 | 0.791076045 | 0.745647894 |
| Kazakhstan | Infertility | 142.1327237 | 236.3011472 | 82.39116954 | 199.4729435 | 327.2407032 | 113.2918011 | 1.0971408 | 1.108141152 | 1.085551895 |
| Kenya | Infertility | 234.0066194 | 383.0152724 | 134.1637827 | 295.3887137 | 479.5238459 | 176.6401702 | 0.85001978 | 1.004942251 | 0.680788718 |
| Kiribati | Infertility | 520.168468 | 866.1101559 | 295.6807457 | 747.1249701 | 1227.298313 | 434.0770831 | 1.204592884 | 1.231345739 | 1.177240091 |
| Kuwait | Infertility | 893.4352921 | 1459.662669 | 514.3489558 | 1069.421076 | 1728.215391 | 616.6812723 | 0.609521811 | 0.628835475 | 0.588380358 |
| Kyrgyzstan | Infertility | 132.5318515 | 214.8394064 | 78.01748321 | 159.7535678 | 259.9100243 | 94.96120041 | 0.610830584 | 0.632556903 | 0.589197723 |
| Lao People's Democratic Republic | Infertility | 495.7759735 | 827.2570875 | 287.4597583 | 888.17423 | 1480.577609 | 525.8011529 | 1.926032376 | 1.941964013 | 1.909855188 |
| Latvia | Infertility | 82.24744785 | 139.2237528 | 45.77730508 | 108.6593461 | 180.3102342 | 60.5068607 | 0.901016476 | 0.912158117 | 0.885647878 |
| Lebanon | Infertility | 724.2023264 | 1179.060502 | 420.4359535 | 948.3645962 | 1544.623974 | 560.0374399 | 0.895840089 | 0.91584738 | 0.8756325 |
| Lesotho | Infertility | 245.1425423 | 398.0818704 | 143.2804915 | 362.8139935 | 593.2415969 | 209.7161891 | 1.30452111 | 1.351219536 | 1.258037785 |
| Liberia | Infertility | 193.1544055 | 310.5501226 | 115.4412213 | 286.2900936 | 468.4940474 | 169.6278686 | 1.287754418 | 1.324253019 | 1.25001025 |
| Libya | Infertility | 781.2505807 | 1259.099934 | 450.1647367 | 880.0305782 | 1431.222209 | 502.7653843 | 0.422460226 | 0.438898375 | 0.405611444 |
| Lithuania | Infertility | 75.62085004 | 126.7586885 | 43.48320107 | 105.0100616 | 175.6708459 | 58.5937947 | 1.076180071 | 1.088070868 | 1.06054185 |
| Luxembourg | Infertility | 971.3718819 | 1607.033642 | 531.1290763 | 1205.74644 | 1997.358504 | 660.0694998 | 0.701153322 | 0.707692854 | 0.693021853 |
| Madagascar | Infertility | 189.4084864 | 304.3122991 | 113.4100525 | 220.4125444 | 362.0121255 | 133.7901205 | 0.514874384 | 0.529958569 | 0.499958146 |
| Malawi | Infertility | 257.1860797 | 414.2548038 | 155.591495 | 255.1987902 | 405.1425024 | 151.127271 | 0.012650815 | 0.058751902 | -0.037281763 |
| Malaysia | Infertility | 874.739936 | 1444.347386 | 505.6803868 | 1442.490874 | 2372.879206 | 837.7031189 | 1.637996595 | 1.658634675 | 1.616238385 |
| Maldives | Infertility | 574.4013719 | 922.7438667 | 324.5993557 | 1170.323263 | 1892.222552 | 708.9667197 | 2.320579238 | 2.351913108 | 2.284072003 |
| Mali | Infertility | 141.5651846 | 226.7019497 | 85.57304276 | 225.0386621 | 363.6334702 | 137.1422773 | 1.519111717 | 1.539121405 | 1.499527091 |
| Malta | Infertility | 937.8894021 | 1536.350082 | 520.9847071 | 1229.005701 | 2025.652337 | 666.8485717 | 0.877569833 | 0.884712027 | 0.869652333 |
| Marshall Islands | Infertility | 447.9603666 | 742.3589657 | 257.6971538 | 732.3311782 | 1225.425942 | 417.7496716 | 1.570697882 | 1.599968755 | 1.54595959 |
| Mauritania | Infertility | 230.5710107 | 381.1378245 | 134.3323507 | 334.8791162 | 546.6045914 | 196.4283794 | 1.228531375 | 1.25631413 | 1.201695106 |
| Mauritius | Infertility | 858.4039645 | 1457.318609 | 501.6612148 | 1329.340146 | 2190.379665 | 788.3347406 | 1.436728509 | 1.459137468 | 1.420591064 |
| Mexico | Infertility | 1100.760271 | 1803.23151 | 603.308911 | 1241.697639 | 1982.772589 | 740.2836091 | 0.390691323 | 0.454376344 | 0.328857589 |
| Micronesia (Federated States of) | Infertility | 565.1942594 | 941.5656719 | 319.9247304 | 800.3132903 | 1321.55978 | 459.3153064 | 1.098466777 | 1.120681755 | 1.076690601 |
| Monaco | Infertility | 1061.804406 | 1735.938653 | 583.094781 | 1226.173533 | 2007.142997 | 675.8948187 | 0.465469202 | 0.469072969 | 0.460920198 |
| Mongolia | Infertility | 124.2334549 | 203.214732 | 70.21910599 | 177.1953368 | 290.6196258 | 100.3142147 | 1.176429953 | 1.198725983 | 1.155292847 |
| Montenegro | Infertility | 63.72080316 | 110.7940187 | 34.35530633 | 81.45350828 | 138.2113935 | 44.15639419 | 0.812226063 | 0.832536063 | 0.792108628 |
| Morocco | Infertility | 584.3624233 | 927.6210685 | 355.5825943 | 819.4424214 | 1342.700225 | 482.2379973 | 1.112545144 | 1.140972828 | 1.083121154 |
| Mozambique | Infertility | 187.9699957 | 314.6934363 | 111.3959504 | 287.2022579 | 467.7990465 | 170.9718552 | 1.382698754 | 1.405779717 | 1.359443998 |
| Myanmar | Infertility | 455.8901865 | 760.969131 | 265.7121539 | 873.9427949 | 1374.629092 | 537.2950741 | 2.136965326 | 2.154822193 | 2.116629336 |
| Namibia | Infertility | 245.1544675 | 393.2022764 | 146.2315663 | 327.6112873 | 541.91236 | 188.8562456 | 0.95796894 | 0.981294824 | 0.933004999 |
| Nauru | Infertility | 653.0553377 | 1096.322414 | 371.072769 | 923.4971669 | 1542.631287 | 544.6127299 | 1.106543532 | 1.12695095 | 1.083812813 |
| Nepal | Infertility | 151.2330631 | 247.9127975 | 89.81331683 | 229.6319786 | 362.9264528 | 137.979677 | 1.354250993 | 1.382205925 | 1.319777074 |
| Netherlands | Infertility | 879.6716225 | 1446.162826 | 496.7226323 | 1087.403622 | 1784.296819 | 601.3343305 | 0.683347007 | 0.690375131 | 0.675949169 |
| New Zealand | Infertility | 1199.449534 | 2386.676363 | 445.6680151 | 1469.727903 | 2691.998404 | 594.9633987 | 0.66211902 | 0.717675551 | 0.604574723 |
| Nicaragua | Infertility | 542.507203 | 902.770227 | 307.2539586 | 754.4542158 | 1233.313772 | 434.0750251 | 1.068471684 | 1.076536542 | 1.059130924 |
| Niger | Infertility | 153.5483177 | 244.1957369 | 91.86798243 | 206.9404086 | 345.5421191 | 123.3228129 | 0.983145551 | 1.011527941 | 0.956755383 |
| Nigeria | Infertility | 211.5097658 | 345.094523 | 124.9011805 | 288.0412648 | 468.3030694 | 166.8972318 | 1.01692116 | 1.058155681 | 0.980732042 |
| Niue | Infertility | 708.9501035 | 1172.895262 | 409.5591677 | 1046.852805 | 1734.676526 | 609.9779969 | 1.246215376 | 1.260412584 | 1.229366238 |
| North Macedonia | Infertility | 53.55914425 | 92.7379208 | 28.64073927 | 74.18862098 | 127.3479368 | 40.39641814 | 1.067628441 | 1.080352451 | 1.057567823 |
| Northern Mariana Islands | Infertility | 783.6653714 | 1284.060385 | 456.7272904 | 997.8659302 | 1657.057288 | 584.3908757 | 0.777584779 | 0.786471104 | 0.765528121 |
| Norway | Infertility | 989.0201356 | 1628.487554 | 580.3899374 | 1128.403524 | 1858.696415 | 654.1855479 | 0.439318764 | 0.458463628 | 0.41342607 |
| Oman | Infertility | 589.1703497 | 965.3712072 | 347.6781187 | 959.7125594 | 1553.587418 | 545.821532 | 1.604362891 | 1.630768188 | 1.582798213 |
| Pakistan | Infertility | 257.0787472 | 422.0865875 | 149.9321394 | 292.2138802 | 471.7026623 | 160.2920623 | 0.337445222 | 0.463829245 | 0.182855038 |
| Palau | Infertility | 741.2884106 | 1221.931146 | 419.4003435 | 1045.204918 | 1744.329008 | 586.8752554 | 1.081929565 | 1.100206501 | 1.06591502 |
| Palestine | Infertility | 617.8403845 | 998.4393806 | 363.4882101 | 782.0912083 | 1270.234191 | 457.6706115 | 0.760173364 | 0.774695253 | 0.746393376 |
| Panama | Infertility | 536.1583952 | 888.5435276 | 304.81324 | 830.5267442 | 1371.347893 | 482.4312033 | 1.427072764 | 1.446686264 | 1.407492744 |
| Papua New Guinea | Infertility | 404.0305332 | 681.4976061 | 234.3057753 | 582.6287509 | 944.6564631 | 347.8665884 | 1.166049719 | 1.190379818 | 1.14052291 |
| Paraguay | Infertility | 154.293234 | 257.9912792 | 90.02837002 | 241.3803479 | 399.2435214 | 134.3339877 | 1.458151672 | 1.476940598 | 1.436948522 |
| Peru | Infertility | 477.4193658 | 756.2690309 | 280.30417 | 989.2271597 | 1708.625555 | 474.7089082 | 2.491999712 | 2.650618608 | 2.327316104 |
| Philippines | Infertility | 599.4554485 | 1005.709265 | 350.3823875 | 991.7235152 | 1648.354934 | 581.156921 | 1.692545169 | 1.775397058 | 1.59734221 |
| Poland | Infertility | 99.13241582 | 166.6632147 | 55.37199737 | 104.5317569 | 163.0498894 | 62.05174606 | 0.149564749 | 0.169288872 | 0.111731629 |
| Portugal | Infertility | 856.5367496 | 1381.518502 | 478.4343555 | 1118.667339 | 1827.412814 | 618.5471894 | 0.867274541 | 0.880155462 | 0.85545125 |
| Puerto Rico | Infertility | 664.5927395 | 1100.849746 | 373.9016495 | 836.9005833 | 1382.048137 | 478.1061972 | 0.754361951 | 0.761378206 | 0.74524871 |
| Qatar | Infertility | 893.6295162 | 1478.910504 | 509.3765241 | 1052.446212 | 1729.911334 | 588.904121 | 0.546822397 | 0.562228778 | 0.530975459 |
| Republic of Korea | Infertility | 580.4254341 | 1062.663526 | 236.6472079 | 831.4832191 | 1556.647719 | 329.7703179 | 1.202124324 | 1.265616948 | 1.145252959 |
| Republic of Moldova | Infertility | 65.81585771 | 111.3421766 | 37.49693754 | 97.44155335 | 160.5733775 | 55.59405535 | 1.276599421 | 1.289266663 | 1.263087355 |
| Romania | Infertility | 55.28501768 | 96.95312258 | 30.01038438 | 78.51498372 | 134.8485188 | 42.73492313 | 1.177217028 | 1.19636419 | 1.159328157 |
| Russian Federation | Infertility | 82.8123734 | 137.8312162 | 47.14581546 | 108.2316624 | 177.7734959 | 62.3342602 | 0.876309657 | 0.886355478 | 0.863443825 |
| Rwanda | Infertility | 203.0584393 | 338.1659392 | 117.5699439 | 265.1723286 | 440.3831072 | 141.560302 | 0.805784389 | 0.925280021 | 0.636193434 |
| Saint Kitts and Nevis | Infertility | 513.1670833 | 825.7480651 | 294.2810447 | 686.4923457 | 1150.613571 | 382.0428063 | 0.947922886 | 0.957056086 | 0.938675891 |
| Saint Lucia | Infertility | 428.8305005 | 707.4458758 | 244.9739736 | 569.8431533 | 920.4844041 | 323.6591213 | 0.925805397 | 0.944226792 | 0.908292162 |
| Saint Vincent and the Grenadines | Infertility | 393.2091937 | 637.9361514 | 222.7071937 | 582.8223108 | 963.7112232 | 325.0912214 | 1.290657984 | 1.316032614 | 1.264502368 |
| Samoa | Infertility | 672.3531245 | 1141.182683 | 380.1288994 | 890.0608305 | 1481.869609 | 502.6495016 | 0.907191852 | 0.924131678 | 0.886722566 |
| San Marino | Infertility | 1022.151424 | 1665.956126 | 566.0023725 | 1190.619154 | 1948.211492 | 650.1362929 | 0.493958006 | 0.502119015 | 0.483766579 |
| Sao Tome and Principe | Infertility | 192.0976107 | 320.183305 | 96.95694312 | 285.3715677 | 462.5519236 | 150.7533176 | 1.279140727 | 1.305864073 | 1.252914954 |
| Saudi Arabia | Infertility | 740.5824331 | 1192.272128 | 427.7314978 | 1032.665866 | 1683.065023 | 586.9049386 | 1.093890219 | 1.122718772 | 1.065423392 |
| Senegal | Infertility | 217.4950269 | 349.9774013 | 132.1649266 | 272.9717807 | 433.6863737 | 167.3316534 | 0.72893706 | 0.740505822 | 0.713884784 |
| Serbia | Infertility | 55.57293415 | 97.57547661 | 30.09179056 | 75.03058942 | 125.9610543 | 41.40119854 | 0.975910022 | 0.982508024 | 0.966875449 |
| Seychelles | Infertility | 910.7999597 | 1511.764259 | 531.4476738 | 1245.991091 | 2050.01143 | 746.5786143 | 1.023683954 | 1.037414813 | 1.009687182 |
| Sierra Leone | Infertility | 167.4571113 | 274.9343234 | 98.76642958 | 286.7378252 | 472.0576136 | 168.2720686 | 1.787009815 | 1.854892674 | 1.728769352 |
| Singapore | Infertility | 643.8587096 | 1205.796925 | 255.3852398 | 963.5520576 | 1806.392095 | 381.6263488 | 1.324085626 | 1.340602926 | 1.30779372 |
| Slovakia | Infertility | 57.31877142 | 97.60036117 | 30.67056276 | 79.30215768 | 132.9619654 | 43.62605907 | 1.047951202 | 1.059528043 | 1.031790201 |
| Slovenia | Infertility | 56.56289188 | 98.3395343 | 32.13683981 | 81.06009718 | 140.6224306 | 44.21342733 | 1.184290576 | 1.194757033 | 1.173586634 |
| Solomon Islands | Infertility | 442.2807375 | 730.716174 | 256.4246804 | 679.0985797 | 1130.192917 | 388.3885959 | 1.36582352 | 1.385755368 | 1.348224138 |
| Somalia | Infertility | 188.4315463 | 310.9515804 | 114.4595186 | 221.0371661 | 369.1895797 | 133.7741501 | 0.502994029 | 0.512044095 | 0.493235861 |
| South Africa | Infertility | 353.8440044 | 572.5772677 | 203.9117607 | 427.9806207 | 713.2388577 | 246.6347685 | 0.654761399 | 0.682666233 | 0.627676255 |
| South Sudan | Infertility | 207.8523558 | 337.7528246 | 125.1551143 | 232.4393292 | 379.2989327 | 140.2280944 | 0.374072123 | 0.387727292 | 0.360152848 |
| Spain | Infertility | 746.8825445 | 1251.946035 | 418.937443 | 1012.291398 | 1695.056903 | 504.6683877 | 0.996270281 | 1.018157279 | 0.972153939 |
| Sri Lanka | Infertility | 714.3153605 | 1162.552686 | 419.6227673 | 1118.985881 | 1840.634725 | 658.9453689 | 1.481906513 | 1.515224132 | 1.452009825 |
| Sudan | Infertility | 423.6040402 | 679.9867203 | 256.0311288 | 754.692251 | 1193.775424 | 442.9838881 | 1.895784008 | 1.919874026 | 1.870518248 |
| Suriname | Infertility | 447.9361816 | 730.9399656 | 255.6390508 | 602.4598637 | 999.5777974 | 337.0026289 | 0.968822592 | 0.98219695 | 0.953346161 |
| Sweden | Infertility | 796.8120049 | 1317.986801 | 462.0471115 | 946.8040486 | 1557.392985 | 550.8542527 | 0.556100175 | 0.577452336 | 0.533920845 |
| Switzerland | Infertility | 951.8589061 | 1552.045357 | 519.3314053 | 1067.499108 | 1750.935204 | 590.395378 | 0.371406594 | 0.377548391 | 0.363945791 |
| Syrian Arab Republic | Infertility | 600.6323624 | 958.8218879 | 352.6434403 | 810.1405664 | 1327.936458 | 471.5213683 | 0.992738888 | 1.028936131 | 0.963420925 |
| Taiwan (Province of China) | Infertility | 575.6952855 | 958.319706 | 326.8388775 | 903.1300566 | 1478.290708 | 534.6509472 | 1.453027289 | 1.461882792 | 1.442064734 |
| Tajikistan | Infertility | 103.736321 | 173.507279 | 58.11482083 | 130.0459499 | 210.0951953 | 77.61400012 | 0.735825949 | 0.768060795 | 0.704876349 |
| Thailand | Infertility | 669.2888915 | 1090.684117 | 398.0348805 | 1234.342266 | 2046.664763 | 733.8664397 | 2.018226594 | 2.036598502 | 1.998742742 |
| Timor-Leste | Infertility | 469.1261554 | 789.9710841 | 275.8957709 | 752.6975242 | 1280.819585 | 437.9668665 | 1.552846012 | 1.569456781 | 1.535628981 |
| Togo | Infertility | 166.2236826 | 271.3054403 | 99.34192478 | 263.7529654 | 432.2160319 | 156.9589613 | 1.515859154 | 1.575444479 | 1.461295332 |
| Tokelau | Infertility | 598.7611447 | 988.4418199 | 345.5383694 | 951.8837669 | 1592.904442 | 550.5426361 | 1.51044022 | 1.524379538 | 1.490898945 |
| Tonga | Infertility | 755.7166116 | 1281.434232 | 427.396895 | 1012.05975 | 1681.178219 | 580.030283 | 0.908021563 | 0.925326834 | 0.892507814 |
| Trinidad and Tobago | Infertility | 446.1594994 | 724.8378339 | 260.9763941 | 653.2650599 | 1061.371459 | 375.603799 | 1.270925814 | 1.307270624 | 1.241758498 |
| Tunisia | Infertility | 595.6114347 | 975.9797648 | 360.0329522 | 835.4129775 | 1352.014311 | 490.6173405 | 1.114934859 | 1.148464333 | 1.085815151 |
| Turkey | Infertility | 555.0363771 | 872.7795753 | 336.5466983 | 772.9548299 | 1239.285236 | 452.6552413 | 1.082740978 | 1.186915545 | 0.967755145 |
| Turkmenistan | Infertility | 132.1088102 | 219.0620973 | 74.44658589 | 192.5953588 | 317.7595049 | 109.6309034 | 1.236837886 | 1.260150782 | 1.211799399 |
| Tuvalu | Infertility | 562.9731429 | 929.6050513 | 323.2596428 | 866.3673228 | 1429.02599 | 506.3703744 | 1.374065352 | 1.403054767 | 1.350110564 |
| Uganda | Infertility | 212.9857077 | 339.0049117 | 128.5355828 | 255.6550356 | 402.1256724 | 154.4089362 | 0.609328048 | 0.629713849 | 0.587574341 |
| Ukraine | Infertility | 77.62095635 | 128.4166679 | 44.57463402 | 93.39189898 | 153.4574871 | 54.01017516 | 0.634524571 | 0.669795435 | 0.602544281 |
| United Arab Emirates | Infertility | 743.185537 | 1207.186851 | 430.468118 | 968.7394322 | 1580.190843 | 555.9276401 | 0.870824991 | 0.880713915 | 0.861350614 |
| United Kingdom | Infertility | 1067.101021 | 1764.922452 | 621.5632974 | 1286.108681 | 2108.20225 | 726.4939695 | 0.599216243 | 0.608265939 | 0.590181104 |
| United Republic of Tanzania | Infertility | 254.3577267 | 414.5505695 | 150.5204947 | 301.4295434 | 482.2991641 | 184.3242706 | 0.558445997 | 0.566102066 | 0.549712244 |
| United States of America | Infertility | 984.0261165 | 1639.021328 | 525.0198723 | 1311.210998 | 2041.976091 | 768.7636471 | 0.940765674 | 0.995378121 | 0.882675354 |
| United States Virgin Islands | Infertility | 643.7660282 | 1081.287254 | 359.8733164 | 803.4078832 | 1334.354725 | 465.5293161 | 0.715878534 | 0.724583078 | 0.707028526 |
| Uruguay | Infertility | 427.4359155 | 719.6176136 | 247.5074297 | 688.1365326 | 1158.612883 | 396.2153663 | 1.576331883 | 1.601734801 | 1.551658376 |
| Uzbekistan | Infertility | 134.2141941 | 221.1963393 | 73.73921291 | 187.8197773 | 304.4080174 | 105.6460445 | 1.087878401 | 1.107699277 | 1.068072313 |
| Vanuatu | Infertility | 510.1783267 | 849.5524982 | 288.2235774 | 742.4184337 | 1243.404188 | 423.8252684 | 1.204861027 | 1.231804237 | 1.183793934 |
| Venezuela (Bolivarian Republic of) | Infertility | 708.1821808 | 1162.019233 | 399.3415144 | 880.5260308 | 1463.539868 | 518.1978641 | 0.699198765 | 0.712873494 | 0.684536667 |
| Viet Nam | Infertility | 412.2881021 | 676.7872926 | 241.7442854 | 776.3015824 | 1283.805102 | 448.186059 | 2.088321806 | 2.114396103 | 2.06051724 |
| Yemen | Infertility | 431.2345249 | 707.016282 | 260.6589022 | 537.1197845 | 874.9979247 | 319.5982648 | 0.72345897 | 0.744056419 | 0.700791829 |
| Zambia | Infertility | 287.4520501 | 468.207601 | 169.9872345 | 346.1833279 | 558.4128182 | 197.2772167 | 0.608738466 | 0.654509258 | 0.563318805 |
| Zimbabwe | Infertility | 287.0755854 | 462.4640914 | 172.0311237 | 311.4309838 | 518.0220431 | 179.0476157 | 0.228159738 | 0.25822134 | 0.195255076 |
| Afghanistan | Primary infertility | 69.40145825 | 181.5039845 | 13.87957957 | 109.9226263 | 204.9474013 | 50.8436617 | 1.520125218 | 1.553625101 | 1.484455393 |
| Albania | Primary infertility | 15.81837702 | 41.32189992 | 2.956283541 | 22.25874784 | 47.23033117 | 8.222017684 | 1.168039243 | 1.22475832 | 1.110341344 |
| Algeria | Primary infertility | 217.63342 | 437.7149138 | 78.59793033 | 271.4059413 | 629.8509143 | 69.35016416 | 0.749306628 | 0.794734585 | 0.70469253 |
| American Samoa | Primary infertility | 197.2138067 | 508.7392266 | 41.71904257 | 266.582946 | 675.3170692 | 58.32143893 | 0.957665295 | 0.977182839 | 0.940230478 |
| Andorra | Primary infertility | 426.8570074 | 947.6341825 | 121.6822963 | 504.9512755 | 1122.600338 | 135.7271402 | 0.536584568 | 0.544121119 | 0.528378469 |
| Angola | Primary infertility | 38.67138151 | 99.27332457 | 7.689915974 | 69.77625014 | 174.3435085 | 14.05454061 | 1.937863713 | 1.975856251 | 1.898465465 |
| Antigua and Barbuda | Primary infertility | 149.5008318 | 355.5720276 | 30.62049607 | 193.7355807 | 464.2038157 | 40.78714416 | 0.823341754 | 0.842743922 | 0.804078119 |
| Argentina | Primary infertility | 144.7308185 | 344.3677836 | 38.99612034 | 223.5184996 | 519.262085 | 62.53349041 | 1.416135152 | 1.434277976 | 1.396708058 |
| Armenia | Primary infertility | 26.62091365 | 73.40104275 | 4.058722403 | 32.71750709 | 79.6870965 | 9.319555076 | 0.634973212 | 0.66184693 | 0.608870456 |
| Australia | Primary infertility | 304.6462414 | 750.3867515 | 82.40194036 | 336.9353912 | 820.3023563 | 91.00539784 | 0.330381879 | 0.337282606 | 0.323962091 |
| Austria | Primary infertility | 475.1268048 | 1078.79983 | 132.2838909 | 484.1008208 | 1130.097746 | 132.0791702 | 0.041580283 | 0.101509058 | -0.004134603 |
| Azerbaijan | Primary infertility | 38.5725632 | 93.62801751 | 7.20609588 | 58.48419856 | 143.7927448 | 10.73291135 | 1.377578692 | 1.417261727 | 1.336837394 |
| Bahamas | Primary infertility | 188.3234294 | 447.8733675 | 41.10578855 | 219.5151385 | 524.3519398 | 47.00757682 | 0.498499567 | 0.507328663 | 0.490138423 |
| Bahrain | Primary infertility | 274.9886653 | 623.7018395 | 71.16116043 | 305.5317913 | 709.4474706 | 79.10985904 | 0.381954338 | 0.408701724 | 0.358678949 |
| Bangladesh | Primary infertility | 53.8216079 | 92.35246152 | 27.34607351 | 76.27443564 | 131.0559979 | 39.26980794 | 1.142495803 | 1.22621666 | 1.05642429 |
| Barbados | Primary infertility | 183.0792821 | 442.1622522 | 39.96661095 | 211.8286112 | 512.4488132 | 45.52998617 | 0.471515902 | 0.48309426 | 0.458341039 |
| Belarus | Primary infertility | 25.96712374 | 63.53359956 | 4.345073419 | 33.952892 | 80.97246988 | 5.659667331 | 0.894867709 | 0.921811637 | 0.875920805 |
| Belgium | Primary infertility | 461.4135236 | 837.9958109 | 234.5244397 | 493.5844214 | 1107.037892 | 145.2325909 | 0.216075488 | 0.228940028 | 0.201313199 |
| Belize | Primary infertility | 180.6289823 | 343.7748939 | 74.42494771 | 229.4192553 | 536.2769179 | 54.75836838 | 0.789460834 | 0.825553579 | 0.755960849 |
| Benin | Primary infertility | 33.10214403 | 83.61371833 | 6.034702393 | 60.30881471 | 120.3626124 | 24.70329477 | 1.959019329 | 2.037738719 | 1.885442109 |
| Bermuda | Primary infertility | 216.8583524 | 527.6825233 | 44.94726895 | 234.8807168 | 576.8133094 | 49.68011686 | 0.281923124 | 0.318025558 | 0.250599042 |
| Bhutan | Primary infertility | 70.25674014 | 162.9309081 | 17.04801073 | 121.3162748 | 284.5581969 | 28.91261157 | 1.794113292 | 1.812283454 | 1.771124626 |
| Bolivia (Plurinational State of) | Primary infertility | 147.2418267 | 278.5604745 | 63.01705283 | 186.0540422 | 459.1927654 | 43.68199685 | 0.755575995 | 0.797544206 | 0.711073242 |
| Bosnia and Herzegovina | Primary infertility | 10.37193552 | 29.0548617 | 1.633974848 | 15.86572128 | 44.38067763 | 2.484490177 | 1.404876471 | 1.43380986 | 1.377987807 |
| Botswana | Primary infertility | 41.64156964 | 91.42704346 | 13.39313761 | 74.49796502 | 213.4108015 | 12.14998125 | 1.883692479 | 1.932065448 | 1.836805279 |
| Brazil | Primary infertility | 81.90180507 | 186.2975478 | 19.72390085 | 74.5346517 | 177.8551349 | 17.75421379 | -0.303845883 | -0.276918187 | -0.330478943 |
| Brunei Darussalam | Primary infertility | 181.3873553 | 484.1832254 | 40.33509026 | 235.7666792 | 636.6081577 | 54.35737605 | 0.845484391 | 0.850398323 | 0.837934442 |
| Bulgaria | Primary infertility | 14.14061745 | 39.50883723 | 2.275735934 | 17.87149887 | 50.83581587 | 2.80116315 | 0.755545515 | 0.767405808 | 0.741267759 |
| Burkina Faso | Primary infertility | 53.16539831 | 98.43522658 | 24.65970106 | 56.85784364 | 138.6988332 | 11.50887297 | 0.235629643 | 0.307029522 | 0.169210773 |
| Burundi | Primary infertility | 45.43554993 | 90.45787122 | 17.02831708 | 36.0765432 | 71.87715993 | 14.57522671 | -0.725090118 | -0.675369881 | -0.795957756 |
| Cabo Verde | Primary infertility | 41.23768869 | 104.5735556 | 8.168932485 | 65.08789402 | 166.8750362 | 13.26003425 | 1.504729534 | 1.546139893 | 1.468582166 |
| Cambodia | Primary infertility | 102.3842757 | 271.090624 | 19.31057484 | 160.3606101 | 425.7728263 | 31.57334366 | 1.542643716 | 1.640135267 | 1.457802122 |
| Cameroon | Primary infertility | 75.16583265 | 145.2683034 | 31.56355966 | 105.7934591 | 250.3282585 | 25.01493507 | 1.083328955 | 1.136244969 | 1.009124911 |
| Canada | Primary infertility | 204.2640559 | 464.6152382 | 54.3001341 | 253.5548318 | 578.5565906 | 69.20533911 | 0.693446858 | 0.700968941 | 0.681626879 |
| Central African Republic | Primary infertility | 63.24879952 | 114.2114931 | 30.6427532 | 69.43616979 | 159.5984413 | 17.15648807 | 0.317681393 | 0.346226801 | 0.289369146 |
| Chad | Primary infertility | 21.05407409 | 55.48620587 | 3.644846722 | 33.08001943 | 88.60246458 | 5.551559524 | 1.368911406 | 1.482873936 | 1.22202123 |
| Chile | Primary infertility | 156.4034981 | 369.03907 | 44.79723915 | 249.9802821 | 588.3697921 | 68.59849771 | 1.515864886 | 1.52824489 | 1.496951066 |
| China | Primary infertility | 44.69235593 | 127.9037712 | 6.214836691 | 96.40645991 | 270.0727332 | 15.38356115 | 2.517000394 | 2.531144837 | 2.504605578 |
| Colombia | Primary infertility | 206.429908 | 357.0749245 | 102.838328 | 246.7225017 | 441.3788341 | 118.8728795 | 0.562811877 | 0.589649409 | 0.535396672 |
| Comoros | Primary infertility | 90.8976761 | 200.7212978 | 24.59824122 | 107.7118224 | 243.1321299 | 29.2217585 | 0.588187177 | 0.624480391 | 0.54666092 |
| Congo | Primary infertility | 42.19843972 | 113.9427894 | 7.198257816 | 57.88232076 | 157.8834573 | 9.283900421 | 1.03325082 | 1.154272742 | 0.896925746 |
| Cook Islands | Primary infertility | 197.2361454 | 504.5404475 | 42.57169382 | 280.6571226 | 717.4405836 | 62.86491184 | 1.115137153 | 1.130616551 | 1.101220239 |
| Costa Rica | Primary infertility | 193.820554 | 516.5140023 | 37.06816867 | 240.8025046 | 634.2653293 | 47.00990356 | 0.69322722 | 0.705090553 | 0.680083194 |
| Coted'Ivoire | Primary infertility | 39.61084739 | 78.97781564 | 16.25290968 | 60.94475385 | 156.5142375 | 12.20681804 | 1.43572788 | 1.472632602 | 1.398265978 |
| Croatia | Primary infertility | 12.73230633 | 35.73399742 | 1.94791041 | 16.78779301 | 47.09588317 | 2.719200545 | 0.912209217 | 0.926449808 | 0.900276605 |
| Cuba | Primary infertility | 157.5362842 | 382.6024134 | 33.38104044 | 204.1355612 | 493.25262 | 42.72984918 | 0.854111913 | 0.878358007 | 0.831709386 |
| Cyprus | Primary infertility | 357.0198872 | 774.2792835 | 104.3879797 | 478.9360954 | 1048.849294 | 128.1939048 | 0.936565138 | 0.956924663 | 0.918362662 |
| Czechia | Primary infertility | 12.59010996 | 36.07945693 | 1.939004798 | 16.01365964 | 45.04139389 | 2.386253672 | 0.815752484 | 0.858864961 | 0.780611846 |
| Democratic People's Republic of Korea | Primary infertility | 58.11276754 | 163.6621719 | 8.373812755 | 64.6773616 | 180.5071542 | 9.763398097 | 0.342639926 | 0.352914716 | 0.329953227 |
| Democratic Republic of the Congo | Primary infertility | 40.59836357 | 101.0012965 | 7.539586571 | 59.77065067 | 149.7497136 | 10.66121712 | 1.355208915 | 1.504509462 | 1.219890595 |
| Denmark | Primary infertility | 381.4961419 | 794.3407475 | 143.1674214 | 499.350955 | 1094.390392 | 131.2292215 | 0.870182534 | 0.88894659 | 0.85122506 |
| Djibouti | Primary infertility | 43.34195153 | 111.1464576 | 9.338488339 | 74.94170375 | 191.1268233 | 15.9985335 | 1.78673025 | 1.804414219 | 1.765867227 |
| Dominica | Primary infertility | 151.1934869 | 358.1983826 | 32.85080056 | 200.6859797 | 485.9023807 | 43.55371422 | 0.908818099 | 0.933958358 | 0.885727512 |
| Dominican Republic | Primary infertility | 146.5722077 | 267.3910897 | 68.25844711 | 176.0979507 | 442.983549 | 35.53924305 | 0.603774263 | 0.653954742 | 0.552816207 |
| Ecuador | Primary infertility | 180.1874266 | 325.6737136 | 83.42040016 | 220.9001542 | 555.4118379 | 51.78485236 | 0.623446345 | 0.677852314 | 0.576555432 |
| Egypt | Primary infertility | 378.3666472 | 606.8321787 | 218.2814236 | 348.427292 | 763.8668568 | 100.4078447 | -0.253396874 | -0.207854102 | -0.291031234 |
| El Salvador | Primary infertility | 170.5120576 | 339.9141431 | 68.54030599 | 180.5006132 | 465.3827708 | 35.86159051 | 0.207272565 | 0.238947775 | 0.171510558 |
| Equatorial Guinea | Primary infertility | 44.81300654 | 113.1412805 | 8.899972691 | 100.9075049 | 256.476954 | 19.79714996 | 2.707054608 | 2.777113211 | 2.643239222 |
| Eritrea | Primary infertility | 44.09284425 | 80.66644641 | 21.3562078 | 59.71466964 | 143.3298573 | 13.72547219 | 1.039886091 | 1.083737583 | 0.995750381 |
| Estonia | Primary infertility | 28.12139304 | 67.54226812 | 4.871695807 | 37.94807482 | 91.39484244 | 6.32932142 | 0.996341232 | 1.019153613 | 0.973449287 |
| Eswatini | Primary infertility | 98.4399819 | 245.1196309 | 19.65129805 | 119.5645328 | 297.0622208 | 24.40539392 | 0.637369366 | 0.662891105 | 0.612900876 |
| Ethiopia | Primary infertility | 39.07450815 | 95.58415709 | 8.68425106 | 59.17138476 | 144.65214 | 13.13390516 | 1.35909716 | 1.398640599 | 1.313019914 |
| Fiji | Primary infertility | 187.3758617 | 452.1168461 | 42.00259813 | 276.6576672 | 683.5229117 | 64.35856019 | 1.261636211 | 1.267930924 | 1.254695827 |
| Finland | Primary infertility | 379.4499228 | 710.0684368 | 178.8089327 | 482.379807 | 1056.139808 | 134.7777159 | 0.775529677 | 0.783490001 | 0.766871663 |
| France | Primary infertility | 486.7129714 | 860.4178607 | 240.8039294 | 573.2163568 | 1208.2244 | 192.5924737 | 0.515824686 | 0.533493786 | 0.494384684 |
| Gabon | Primary infertility | 61.31298639 | 155.6051732 | 12.62000273 | 91.02122358 | 231.2480492 | 18.31947366 | 1.299889726 | 1.32771016 | 1.270975985 |
| Gambia | Primary infertility | 40.78668027 | 101.4466022 | 8.482293174 | 60.36838356 | 151.7028122 | 12.113511 | 1.308505865 | 1.360467583 | 1.266494936 |
| Georgia | Primary infertility | 40.73376612 | 104.7111445 | 7.209293006 | 67.67966219 | 173.2393426 | 12.12866698 | 1.667610036 | 1.693004162 | 1.636049993 |
| Germany | Primary infertility | 380.6694446 | 756.0553393 | 152.2398809 | 402.077289 | 912.2702838 | 101.3854901 | 0.16094546 | 0.186488985 | 0.13769661 |
| Ghana | Primary infertility | 38.82684289 | 73.93594398 | 17.70075967 | 56.23027115 | 144.8391607 | 10.36469991 | 1.271535445 | 1.618652369 | 0.944273566 |
| Greece | Primary infertility | 421.6660543 | 930.1212963 | 120.0712449 | 492.5737931 | 1106.290353 | 131.7229477 | 0.487908134 | 0.499159873 | 0.476691485 |
| Greenland | Primary infertility | 182.8029202 | 413.1080145 | 48.02409672 | 231.798352 | 520.2635709 | 61.94585738 | 0.780446766 | 0.794854511 | 0.765863998 |
| Grenada | Primary infertility | 131.0211981 | 308.3127557 | 27.08887768 | 182.2676271 | 435.7159262 | 39.06011631 | 1.07820674 | 1.101556135 | 1.056729467 |
| Guam | Primary infertility | 214.2541165 | 554.5836865 | 45.97159929 | 293.8496946 | 743.6550144 | 66.36958137 | 1.021056049 | 1.035726459 | 1.003376956 |
| Guatemala | Primary infertility | 100.2496569 | 200.6756348 | 40.0941718 | 134.2745948 | 377.268213 | 23.58647802 | 0.946447634 | 0.955017363 | 0.938031051 |
| Guinea | Primary infertility | 32.26091393 | 82.0830495 | 6.502328231 | 45.97410352 | 91.08034877 | 18.06509128 | 1.145060909 | 1.234918564 | 1.045574644 |
| Guinea-Bissau | Primary infertility | 37.55247795 | 92.88127408 | 7.845323545 | 56.60844958 | 140.4012764 | 11.59798583 | 1.355472702 | 1.397310791 | 1.315653297 |
| Guyana | Primary infertility | 130.8817201 | 312.3616949 | 28.68852954 | 182.3217213 | 434.4228523 | 39.19034073 | 1.121332319 | 1.174738001 | 1.062187753 |
| Haiti | Primary infertility | 107.1935681 | 195.7450542 | 48.2324673 | 92.43840965 | 183.9760459 | 36.80984266 | -0.47558775 | -0.43413795 | -0.528578173 |
| Honduras | Primary infertility | 103.0183912 | 296.2480373 | 17.73050485 | 143.7667115 | 400.2676578 | 25.28664318 | 1.142201669 | 1.213630695 | 1.077298031 |
| Hungary | Primary infertility | 14.15197596 | 40.46241295 | 2.247429195 | 17.16938714 | 48.96000652 | 2.788134359 | 0.632036651 | 0.642235261 | 0.622206138 |
| Iceland | Primary infertility | 442.623741 | 960.2834318 | 127.6825369 | 514.6309796 | 1154.349516 | 135.34821 | 0.486421139 | 0.501776641 | 0.46957353 |
| India | Primary infertility | 93.23205007 | 192.8453325 | 29.20710458 | 139.0669639 | 332.1065038 | 31.36126186 | 1.323775891 | 1.373783988 | 1.276124172 |
| Indonesia | Primary infertility | 190.3093464 | 438.636432 | 46.99182598 | 316.3862287 | 787.2443287 | 72.13554025 | 1.740173701 | 1.830343104 | 1.616965689 |
| Iran (Islamic Republic of) | Primary infertility | 355.3841059 | 687.1238525 | 127.079808 | 463.9409416 | 899.853717 | 164.191438 | 0.8818657 | 0.938691298 | 0.811922533 |
| Iraq | Primary infertility | 235.2460394 | 543.5271893 | 60.56487461 | 262.6665649 | 603.3320752 | 68.13095375 | 0.397978631 | 0.434229653 | 0.364384126 |
| Ireland | Primary infertility | 413.5831553 | 910.9369856 | 118.0070039 | 480.0822969 | 1089.350909 | 129.110874 | 0.479979431 | 0.484800718 | 0.475301048 |
| Israel | Primary infertility | 330.5092506 | 743.4936528 | 90.62332397 | 401.5673674 | 917.8922126 | 101.8134187 | 0.622995636 | 0.633509031 | 0.610883456 |
| Italy | Primary infertility | 666.0555194 | 1681.788499 | 150.5937741 | 815.6797554 | 1858.694174 | 213.407937 | 0.679271421 | 0.710350782 | 0.645035481 |
| Jamaica | Primary infertility | 145.4047476 | 335.8937965 | 32.532744 | 190.0247943 | 448.0752196 | 40.86363978 | 0.873712011 | 0.909192191 | 0.837773656 |
| Japan | Primary infertility | 399.9089196 | 1008.640884 | 98.87851864 | 390.9599549 | 998.4628081 | 94.92906206 | -0.073596789 | -0.065067627 | -0.082057141 |
| Jordan | Primary infertility | 265.996073 | 508.2830984 | 109.5359195 | 266.2706219 | 492.7308347 | 120.8292644 | -0.075918684 | -0.004535805 | -0.147908701 |
| Kazakhstan | Primary infertility | 45.11443131 | 93.09909651 | 15.54774896 | 54.72158927 | 136.8308751 | 9.824791927 | 0.629987169 | 0.644397295 | 0.613711738 |
| Kenya | Primary infertility | 54.48515838 | 138.5972683 | 10.54398828 | 59.41567821 | 153.9961363 | 11.72727956 | 0.429906537 | 0.62177421 | 0.230687479 |
| Kiribati | Primary infertility | 137.8162082 | 350.4272082 | 29.05104993 | 196.3018533 | 500.8106127 | 41.56626832 | 1.140611463 | 1.170119266 | 1.109822632 |
| Kuwait | Primary infertility | 287.5948714 | 657.461405 | 76.74017433 | 338.8599518 | 784.7689401 | 89.26483477 | 0.561429798 | 0.57843065 | 0.544188352 |
| Kyrgyzstan | Primary infertility | 31.88024729 | 81.3595912 | 5.763717291 | 37.11795858 | 96.5644212 | 6.692222609 | 0.503892977 | 0.530963511 | 0.481448345 |
| Lao People's Democratic Republic | Primary infertility | 150.4960331 | 359.4655963 | 32.94259188 | 255.8918176 | 646.5933529 | 59.94030431 | 1.746655366 | 1.760034093 | 1.733124009 |
| Latvia | Primary infertility | 28.1811686 | 56.67529294 | 9.103886706 | 31.87538714 | 77.60604971 | 5.032952599 | 0.400915185 | 0.416763979 | 0.386250215 |
| Lebanon | Primary infertility | 204.5461292 | 488.4658701 | 49.20464155 | 258.5469391 | 623.4045809 | 60.30725941 | 0.763738687 | 0.784317003 | 0.74363754 |
| Lesotho | Primary infertility | 68.35213357 | 168.3522424 | 12.88001533 | 101.808144 | 254.0041547 | 18.47187623 | 1.332680429 | 1.370892647 | 1.294879806 |
| Liberia | Primary infertility | 50.40043982 | 95.76058272 | 21.59939541 | 54.66134938 | 142.1444316 | 10.37941471 | 0.30279811 | 0.394691941 | 0.205074465 |
| Libya | Primary infertility | 270.6222225 | 550.0630279 | 98.81724174 | 309.7627417 | 691.1059273 | 84.50393531 | 0.46973849 | 0.484439369 | 0.45429019 |
| Lithuania | Primary infertility | 22.87252855 | 45.75869407 | 8.318168493 | 28.2046221 | 70.27341731 | 4.079249839 | 0.69140228 | 0.705755384 | 0.678034455 |
| Luxembourg | Primary infertility | 427.4269799 | 918.7018151 | 120.7337189 | 507.3094788 | 1133.303784 | 140.299416 | 0.552167902 | 0.557693073 | 0.546553504 |
| Madagascar | Primary infertility | 55.83543166 | 105.2742364 | 25.53001729 | 69.18592601 | 159.7249598 | 17.54616441 | 0.752905805 | 0.790833251 | 0.715057167 |
| Malawi | Primary infertility | 55.44647575 | 102.5353515 | 24.46571522 | 40.90225228 | 84.11746678 | 14.88408421 | -0.957154417 | -0.869138003 | -1.051574236 |
| Malaysia | Primary infertility | 183.7943011 | 489.1573424 | 37.78199121 | 286.0954429 | 746.6641408 | 60.37538538 | 1.442563643 | 1.463331916 | 1.415740884 |
| Maldives | Primary infertility | 194.260987 | 431.1965912 | 49.78295767 | 399.2382227 | 735.6595502 | 199.2623866 | 2.344668064 | 2.372633258 | 2.314525922 |
| Mali | Primary infertility | 37.7304099 | 68.74874614 | 18.14449023 | 50.07327625 | 98.41313611 | 20.97955735 | 0.98454517 | 1.029568088 | 0.932197374 |
| Malta | Primary infertility | 400.3777354 | 893.6148301 | 113.7866356 | 500.6143654 | 1117.011494 | 131.6452697 | 0.72347282 | 0.7296526 | 0.715760578 |
| Marshall Islands | Primary infertility | 120.112075 | 305.8100831 | 24.81234304 | 194.5550924 | 492.5753413 | 41.89133228 | 1.535094325 | 1.556685017 | 1.495212576 |
| Mauritania | Primary infertility | 64.67503287 | 132.9186102 | 21.82486403 | 91.37687981 | 220.3588655 | 19.98368674 | 1.138699365 | 1.18217724 | 1.098512773 |
| Mauritius | Primary infertility | 242.8264992 | 606.5725656 | 54.04702248 | 350.8589267 | 893.273771 | 84.07678321 | 1.197293135 | 1.205574727 | 1.188608092 |
| Mexico | Primary infertility | 277.0526326 | 684.7914205 | 65.20405562 | 249.2991916 | 648.4221217 | 48.72450927 | -0.357413102 | -0.330447876 | -0.387425998 |
| Micronesia (Federated States of) | Primary infertility | 152.0746511 | 387.2615953 | 31.75487476 | 211.3340563 | 540.2333092 | 46.10845937 | 1.04055146 | 1.062541304 | 1.019526741 |
| Monaco | Primary infertility | 451.4185742 | 985.9777002 | 125.9155962 | 505.9855714 | 1134.39544 | 135.0398504 | 0.357972981 | 0.373616456 | 0.341866203 |
| Mongolia | Primary infertility | 31.90562086 | 78.75720063 | 5.763205028 | 46.09477425 | 118.2517826 | 8.058741445 | 1.221754824 | 1.250201512 | 1.195443804 |
| Montenegro | Primary infertility | 13.89532698 | 39.44299621 | 2.244485176 | 17.92220746 | 50.13513213 | 2.876680089 | 0.834055178 | 0.845799622 | 0.821262586 |
| Morocco | Primary infertility | 272.2188114 | 459.5329266 | 142.1417807 | 303.3850546 | 679.3227119 | 83.50516818 | 0.368439042 | 0.399719574 | 0.340537993 |
| Mozambique | Primary infertility | 44.70708138 | 111.646408 | 9.772005011 | 67.47195567 | 168.5232798 | 14.75637647 | 1.387479279 | 1.443109374 | 1.333576655 |
| Myanmar | Primary infertility | 142.2757504 | 350.0463515 | 31.10437295 | 273.0394508 | 492.4455074 | 130.2982157 | 2.124224242 | 2.145422596 | 2.095371544 |
| Namibia | Primary infertility | 59.89907678 | 120.8106316 | 24.54724234 | 86.1498668 | 225.1184852 | 15.81252137 | 1.151875638 | 1.236664604 | 1.059921505 |
| Nauru | Primary infertility | 169.2825063 | 437.9771839 | 36.29857952 | 237.895656 | 613.8804321 | 51.7601114 | 1.079807704 | 1.105396952 | 1.046024997 |
| Nepal | Primary infertility | 52.92996503 | 121.2356776 | 12.77079865 | 96.9924133 | 169.4546357 | 46.6815862 | 1.992183921 | 2.052765809 | 1.935118534 |
| Netherlands | Primary infertility | 377.9754349 | 813.9944476 | 109.5944891 | 450.5500133 | 1003.81243 | 124.1728364 | 0.551474582 | 0.567896681 | 0.534148721 |
| New Zealand | Primary infertility | 400.2912997 | 1014.06628 | 108.5392045 | 463.1076122 | 1104.753898 | 122.7153976 | 0.462059444 | 0.485024777 | 0.440229139 |
| Nicaragua | Primary infertility | 137.895412 | 363.0830788 | 27.21811016 | 181.3317894 | 468.1747681 | 37.46337779 | 0.902786575 | 0.945994054 | 0.865457254 |
| Niger | Primary infertility | 44.93629995 | 82.06148522 | 21.10824206 | 43.14499298 | 108.9078592 | 9.197117263 | -0.144315503 | -0.040937306 | -0.26129815 |
| Nigeria | Primary infertility | 45.72647723 | 111.335813 | 10.07686837 | 68.16488269 | 170.1788643 | 12.9930181 | 1.361529046 | 1.414344938 | 1.309382359 |
| Niue | Primary infertility | 182.410839 | 472.1301273 | 39.31386117 | 265.3821483 | 676.7141967 | 57.89612074 | 1.196065961 | 1.210992552 | 1.179857274 |
| North Macedonia | Primary infertility | 11.69366293 | 33.2873368 | 1.881791283 | 16.08066471 | 45.24234166 | 2.528257387 | 1.043324207 | 1.055689448 | 1.032158844 |
| Northern Mariana Islands | Primary infertility | 204.7583179 | 523.6774348 | 43.56886802 | 258.0324714 | 668.314443 | 55.92914962 | 0.747357718 | 0.759664508 | 0.735544963 |
| Norway | Primary infertility | 413.1056246 | 890.3488448 | 133.3835781 | 462.3060157 | 1006.787748 | 146.9402002 | 0.359785486 | 0.371670477 | 0.345323296 |
| Oman | Primary infertility | 186.3710072 | 425.877176 | 47.92659304 | 299.0623169 | 688.1741883 | 76.46895657 | 1.556125926 | 1.586790588 | 1.531355474 |
| Pakistan | Primary infertility | 97.80050311 | 248.3657236 | 14.1583161 | 129.6842096 | 320.285107 | 16.70558864 | 0.925171538 | 1.061535128 | 0.763365867 |
| Palau | Primary infertility | 190.7601706 | 490.2585276 | 41.37264029 | 265.0512721 | 685.9827464 | 59.46675811 | 1.049842964 | 1.070745554 | 1.009701508 |
| Palestine | Primary infertility | 201.642248 | 463.0852379 | 52.57721037 | 248.9398117 | 576.3113034 | 64.6500863 | 0.688193373 | 0.704243207 | 0.675513166 |
| Panama | Primary infertility | 106.6165227 | 300.4068956 | 17.80514685 | 158.7697277 | 451.5981733 | 27.145186 | 1.287472377 | 1.307418695 | 1.266870476 |
| Papua New Guinea | Primary infertility | 95.66074787 | 249.0448247 | 18.97943976 | 128.2003623 | 249.9851419 | 53.63369156 | 0.950427442 | 0.969303976 | 0.931539022 |
| Paraguay | Primary infertility | 50.03168837 | 99.95381911 | 18.29657219 | 72.70577085 | 179.6417737 | 14.46498913 | 1.2238284 | 1.245082808 | 1.210603195 |
| Peru | Primary infertility | 113.5885713 | 216.1176354 | 51.32985958 | 175.121925 | 445.1292042 | 36.44618901 | 1.312868053 | 1.603708866 | 0.827832098 |
| Philippines | Primary infertility | 181.8542355 | 508.8638529 | 28.7934455 | 339.8641451 | 949.6740737 | 53.93182675 | 2.06486787 | 2.083397603 | 2.045960805 |
| Poland | Primary infertility | 29.8498321 | 74.16087078 | 6.00012464 | 26.05751902 | 65.64611102 | 4.689763208 | -0.442349734 | -0.411653915 | -0.477259539 |
| Portugal | Primary infertility | 368.5364557 | 798.4638241 | 106.7770122 | 469.3872363 | 1042.646991 | 128.6540026 | 0.776958075 | 0.79393405 | 0.756083992 |
| Puerto Rico | Primary infertility | 212.9251261 | 513.1876942 | 44.93866871 | 263.6550251 | 645.0179519 | 55.09878112 | 0.693165512 | 0.699045542 | 0.687330448 |
| Qatar | Primary infertility | 288.5362587 | 668.7106012 | 75.33891946 | 327.7670659 | 773.6303819 | 84.26787578 | 0.435748152 | 0.457396973 | 0.413445007 |
| Republic of Korea | Primary infertility | 161.6231076 | 416.030728 | 36.32920447 | 211.0518272 | 565.4440334 | 48.37202444 | 0.844238429 | 0.87344075 | 0.810808591 |
| Republic of Moldova | Primary infertility | 22.76629547 | 53.80003813 | 4.560215304 | 33.56651636 | 77.63252111 | 6.469962769 | 1.258263274 | 1.310047802 | 1.202108583 |
| Romania | Primary infertility | 12.35788889 | 34.36717411 | 2.041281245 | 17.22226859 | 49.12221071 | 2.678273194 | 1.104430782 | 1.140822774 | 1.076126664 |
| Russian Federation | Primary infertility | 26.50915426 | 62.86553304 | 5.510587269 | 33.52767478 | 80.2942419 | 6.766242891 | 0.771119359 | 0.788673599 | 0.752197479 |
| Rwanda | Primary infertility | 57.07134717 | 114.1493756 | 21.34125471 | 61.72540315 | 160.7544766 | 11.39950514 | 0.061338895 | 0.246495635 | -0.243328096 |
| Saint Kitts and Nevis | Primary infertility | 169.9977394 | 414.6150911 | 37.0589943 | 220.6405929 | 530.4950398 | 46.83848831 | 0.838634152 | 0.848536779 | 0.828657831 |
| Saint Lucia | Primary infertility | 145.1402202 | 345.942844 | 31.47034704 | 186.5401457 | 447.3468118 | 39.31649868 | 0.817371835 | 0.841956341 | 0.795655957 |
| Saint Vincent and the Grenadines | Primary infertility | 132.2710167 | 311.2967434 | 28.9306721 | 191.535066 | 462.3255387 | 39.87256173 | 1.219934405 | 1.243047583 | 1.194746523 |
| Samoa | Primary infertility | 174.7722404 | 449.7750449 | 36.64202845 | 227.8535227 | 584.1953764 | 49.66607951 | 0.854768122 | 0.879403302 | 0.824045941 |
| San Marino | Primary infertility | 435.5639235 | 944.1683516 | 124.3956781 | 493.6083424 | 1098.383005 | 129.2542985 | 0.40537202 | 0.420912715 | 0.390029499 |
| Sao Tome and Principe | Primary infertility | 38.62576187 | 97.27844331 | 6.998921033 | 56.28943223 | 141.4942561 | 10.05007926 | 1.258089388 | 1.31099417 | 1.209503481 |
| Saudi Arabia | Primary infertility | 236.0501163 | 548.7859071 | 61.27021154 | 319.831205 | 742.6884106 | 80.97201023 | 1.021215518 | 1.043721145 | 0.998523671 |
| Senegal | Primary infertility | 61.8801062 | 112.6267327 | 29.17055035 | 70.72623072 | 133.3658133 | 30.7821865 | 0.408136374 | 0.448044917 | 0.364464901 |
| Serbia | Primary infertility | 11.84885883 | 33.1152416 | 1.88334208 | 16.34551914 | 45.43591454 | 2.618105206 | 1.057019933 | 1.068436222 | 1.044688188 |
| Seychelles | Primary infertility | 256.7360975 | 646.1125424 | 57.83778566 | 340.2773047 | 846.14579 | 83.11464783 | 0.927735961 | 0.954576986 | 0.903295317 |
| Sierra Leone | Primary infertility | 28.44866527 | 76.08623286 | 5.08884012 | 46.70185696 | 126.0293288 | 8.238616439 | 1.551320329 | 1.670919985 | 1.378755942 |
| Singapore | Primary infertility | 175.6278292 | 461.062392 | 39.82999358 | 227.1677694 | 615.8040328 | 50.94008123 | 0.825156431 | 0.840873654 | 0.810710588 |
| Slovakia | Primary infertility | 12.18841311 | 34.96795262 | 1.930899749 | 17.35269864 | 50.13561997 | 2.739775105 | 1.154279677 | 1.168295127 | 1.141188236 |
| Slovenia | Primary infertility | 9.375024535 | 22.73409448 | 2.720600984 | 10.89557261 | 36.34349785 | 1.595284053 | 0.496226929 | 0.52553806 | 0.462806591 |
| Solomon Islands | Primary infertility | 120.3777418 | 307.2301045 | 24.75291012 | 182.8501103 | 459.3995204 | 37.91634706 | 1.344445986 | 1.363966637 | 1.323804032 |
| Somalia | Primary infertility | 46.77268265 | 112.220334 | 10.27526793 | 54.50205423 | 134.3134439 | 12.05202169 | 0.495700279 | 0.500411436 | 0.490988317 |
| South Africa | Primary infertility | 106.238552 | 254.4394635 | 22.22160344 | 126.9371917 | 324.2931315 | 25.87857129 | 0.620217277 | 0.657609046 | 0.582410968 |
| South Sudan | Primary infertility | 52.77719731 | 128.4016114 | 11.70931336 | 58.17095723 | 143.5328281 | 12.83637153 | 0.335122179 | 0.357923637 | 0.31155133 |
| Spain | Primary infertility | 329.9487328 | 663.230329 | 133.8370205 | 375.0373941 | 872.00842 | 92.62179831 | 0.419110868 | 0.438335108 | 0.38903845 |
| Sri Lanka | Primary infertility | 271.9810053 | 505.1518643 | 119.9544515 | 314.1456392 | 771.8698182 | 77.9294919 | 0.482933731 | 0.523060546 | 0.443308443 |
| Sudan | Primary infertility | 114.6631254 | 209.6426382 | 53.01452365 | 162.7304665 | 420.1029134 | 33.57055474 | 1.129975281 | 1.173781692 | 1.079688893 |
| Suriname | Primary infertility | 148.0384217 | 350.8063216 | 31.66368557 | 196.7855997 | 470.3256923 | 41.87872828 | 0.914943182 | 0.931720162 | 0.89697835 |
| Sweden | Primary infertility | 327.302213 | 724.6614232 | 103.3362792 | 375.2379433 | 827.2931372 | 120.249158 | 0.443375931 | 0.463178336 | 0.420700502 |
| Switzerland | Primary infertility | 411.6292287 | 906.4927335 | 116.3561738 | 443.5783585 | 982.9513277 | 119.0944395 | 0.225944282 | 0.246450354 | 0.206677358 |
| Syrian Arab Republic | Primary infertility | 179.1653096 | 363.0362864 | 65.47239576 | 238.6625957 | 563.7254725 | 59.83324367 | 0.950199943 | 0.976866645 | 0.925686336 |
| Taiwan (Province of China) | Primary infertility | 93.03123336 | 267.6536605 | 14.93027415 | 136.7714996 | 383.7508053 | 24.29898132 | 1.237514072 | 1.248445305 | 1.222326069 |
| Tajikistan | Primary infertility | 29.35140001 | 72.36951242 | 5.819112596 | 42.83477352 | 84.44242164 | 16.74263353 | 1.216197372 | 1.260858454 | 1.169677156 |
| Thailand | Primary infertility | 309.3398667 | 564.2344149 | 147.0593798 | 423.7341565 | 988.1419187 | 116.9913696 | 1.02775876 | 1.074269287 | 0.982641131 |
| Timor-Leste | Primary infertility | 153.6252856 | 359.6331341 | 36.77328537 | 237.185688 | 567.3112703 | 57.76644857 | 1.429095748 | 1.443661197 | 1.411931915 |
| Togo | Primary infertility | 43.80166313 | 90.15483142 | 15.98293039 | 61.70109345 | 151.3196799 | 12.98861012 | 1.218015092 | 1.329569639 | 1.116207491 |
| Tokelau | Primary infertility | 156.9796622 | 406.7142337 | 32.86302659 | 244.9744881 | 632.3354038 | 53.77716732 | 1.441055624 | 1.459321934 | 1.41923645 |
| Tonga | Primary infertility | 194.1549655 | 499.9722392 | 40.85406152 | 258.3410683 | 669.9391145 | 57.11113018 | 0.908001661 | 0.926967515 | 0.877153281 |
| Trinidad and Tobago | Primary infertility | 183.9173708 | 347.0622248 | 80.50268871 | 219.7084919 | 520.4463548 | 49.71947409 | 0.602108491 | 0.637261257 | 0.565886507 |
| Tunisia | Primary infertility | 275.1715095 | 495.2620895 | 136.7096703 | 301.3563746 | 665.5949611 | 85.06444579 | 0.347654447 | 0.384101812 | 0.313043003 |
| Turkey | Primary infertility | 276.8949909 | 477.7078234 | 140.1292088 | 246.1356226 | 576.6022828 | 60.40123007 | -0.349594101 | -0.295386199 | -0.403467945 |
| Turkmenistan | Primary infertility | 34.51256662 | 87.27040371 | 6.163028674 | 48.31421937 | 124.5466699 | 8.423009247 | 1.12380525 | 1.158551959 | 1.08826415 |
| Tuvalu | Primary infertility | 148.6479791 | 377.2236922 | 32.02782273 | 224.2305701 | 580.4590608 | 48.66265566 | 1.303696353 | 1.337925799 | 1.272097531 |
| Uganda | Primary infertility | 57.2423939 | 102.6730004 | 28.00077615 | 48.54241941 | 95.7904232 | 19.06640404 | -0.532876509 | -0.497823416 | -0.573529552 |
| Ukraine | Primary infertility | 30.46812764 | 68.35800148 | 7.428114793 | 34.77146634 | 79.12437005 | 8.069676974 | 0.455536009 | 0.519926852 | 0.407757684 |
| United Arab Emirates | Primary infertility | 233.6278028 | 537.163708 | 61.37852146 | 301.4821033 | 697.4013122 | 78.46849626 | 0.850252187 | 0.869762519 | 0.834170004 |
| United Kingdom | Primary infertility | 452.5858652 | 968.0740668 | 145.8919729 | 531.8304608 | 1157.666082 | 165.452426 | 0.520819809 | 0.534292693 | 0.505506211 |
| United Republic of Tanzania | Primary infertility | 52.30887005 | 98.11039046 | 23.4799077 | 50.99072027 | 102.9198208 | 20.29845827 | -0.06973814 | -0.024188887 | -0.115866495 |
| United States of America | Primary infertility | 430.1665312 | 952.0856718 | 120.3105443 | 517.3689524 | 1134.395416 | 147.3929271 | 0.586942443 | 0.644731054 | 0.524655087 |
| United States Virgin Islands | Primary infertility | 216.4498463 | 522.3347309 | 46.5624789 | 261.1329546 | 638.2982111 | 55.74227977 | 0.599027562 | 0.606976847 | 0.591255286 |
| Uruguay | Primary infertility | 152.0348066 | 351.7433833 | 41.15629023 | 237.7520674 | 550.4141818 | 66.19991766 | 1.465778419 | 1.479759767 | 1.451633883 |
| Uzbekistan | Primary infertility | 34.57696371 | 87.23999942 | 6.617772941 | 45.95451624 | 118.2751202 | 8.54182222 | 0.897235038 | 0.975041375 | 0.826047939 |
| Vanuatu | Primary infertility | 136.094747 | 344.6722307 | 28.03860671 | 198.4945725 | 505.2480084 | 42.39800619 | 1.211161476 | 1.232562049 | 1.192133519 |
| Venezuela (Bolivarian Republic of) | Primary infertility | 181.3297192 | 476.2422451 | 34.63014508 | 218.3619882 | 574.8642743 | 43.29258499 | 0.593617764 | 0.60964706 | 0.57615982 |
| Viet Nam | Primary infertility | 114.9962477 | 289.6205116 | 24.81166181 | 200.3560877 | 487.7911845 | 48.00627479 | 1.834383885 | 1.88271024 | 1.796116171 |
| Yemen | Primary infertility | 154.6810065 | 339.9438259 | 41.6358618 | 176.718335 | 408.0175647 | 44.92252235 | 0.452090103 | 0.474346832 | 0.432322078 |
| Zambia | Primary infertility | 51.81809772 | 101.2452694 | 21.83393826 | 72.08723549 | 188.2204498 | 14.00423288 | 1.360417731 | 1.781660711 | 0.943532469 |
| Zimbabwe | Primary infertility | 58.8526843 | 119.6144952 | 21.50271627 | 63.2719195 | 172.7350276 | 11.09112463 | 0.245433404 | 0.34201962 | 0.143100428 |
| Afghanistan | Secondary infertility | 295.5256742 | 508.8732124 | 143.8872498 | 505.321054 | 871.6448853 | 259.2117826 | 0.987179101 | 1.016361409 | 0.954842708 |
| Albania | Secondary infertility | 39.04502916 | 74.99565313 | 16.23933994 | 316.0682461 | 551.1567437 | 162.2054972 | 0.47333282 | 0.496415785 | 0.450932082 |
| Algeria | Secondary infertility | 380.159139 | 687.9939125 | 175.2651388 | 632.2824124 | 1120.543115 | 289.3376486 | 1.544046431 | 1.573245744 | 1.51159391 |
| American Samoa | Secondary infertility | 547.1558756 | 1004.075222 | 240.7196325 | 780.5575229 | 1372.751477 | 357.9825815 | 0.967622807 | 0.982633195 | 0.949479593 |
| Andorra | Secondary infertility | 575.222772 | 1102.894143 | 217.3124455 | 766.358557 | 1300.97837 | 401.9091114 | 0.659038257 | 0.671611343 | 0.646197484 |
| Angola | Secondary infertility | 126.8128285 | 225.6301986 | 59.54668829 | 1156.395432 | 2020.034257 | 579.2972613 | 1.971991458 | 2.003229374 | 1.93939066 |
| Antigua and Barbuda | Secondary infertility | 304.487605 | 558.4680022 | 133.6701179 | 771.0850399 | 1276.091153 | 446.4534667 | 0.925068126 | 0.949608719 | 0.902741228 |
| Argentina | Secondary infertility | 272.7482081 | 518.8385772 | 108.1241883 | 600.9033442 | 973.6760222 | 359.3410705 | 1.329544811 | 1.363637417 | 1.295351682 |
| Armenia | Secondary infertility | 96.24135094 | 170.4792397 | 44.63936746 | 515.5118362 | 927.7437014 | 233.2627733 | 1.026071128 | 1.049283368 | 0.999971991 |
| Australia | Secondary infertility | 592.8444718 | 1319.684051 | 156.6595342 | 581.2891986 | 1003.208366 | 290.0874996 | 0.449956115 | 0.461970424 | 0.435209319 |
| Austria | Secondary infertility | 893.295152 | 1605.068627 | 376.2608675 | 651.8593702 | 1252.564283 | 207.9723416 | 0.238500534 | 0.251687683 | 0.213518592 |
| Azerbaijan | Secondary infertility | 88.74548739 | 163.3634647 | 38.89590408 | 575.9454947 | 1012.704115 | 270.2955841 | 1.437885781 | 1.455261 | 1.415938198 |
| Bahamas | Secondary infertility | 379.5917735 | 705.0001574 | 168.7912509 | 454.4283886 | 751.0220491 | 262.3086964 | 0.590596405 | 0.603849011 | 0.576890859 |
| Bahrain | Secondary infertility | 564.1869484 | 1051.693015 | 227.2929578 | 804.8402415 | 1418.305701 | 375.2272587 | 0.491724853 | 0.512987293 | 0.472284983 |
| Bangladesh | Secondary infertility | 91.51082629 | 152.5685262 | 52.0753475 | 662.2073078 | 1206.949565 | 290.9390251 | 1.736635506 | 1.767684404 | 1.699489204 |
| Barbados | Secondary infertility | 378.6989724 | 693.124998 | 166.5197818 | 810.6081096 | 1445.434365 | 354.3964711 | 0.541952158 | 0.55893462 | 0.5256816 |
| Belarus | Secondary infertility | 52.13584989 | 99.55338242 | 22.01636586 | 550.8231168 | 1010.152986 | 244.7957423 | 0.997072942 | 1.024293615 | 0.978414374 |
| Belgium | Secondary infertility | 613.3775233 | 1054.967627 | 312.7304348 | 651.5192651 | 1232.215227 | 277.8809212 | 0.952986675 | 1.002145336 | 0.903131062 |
| Belize | Secondary infertility | 254.0110488 | 441.4187993 | 129.7005745 | 496.2484695 | 911.4696085 | 221.0921121 | 1.383291129 | 1.419132763 | 1.352226849 |
| Benin | Secondary infertility | 145.0186414 | 251.1927248 | 66.01525211 | 131.521577 | 227.6216918 | 71.50905027 | 1.917883799 | 1.948909793 | 1.888241288 |
| Bermuda | Secondary infertility | 456.7554032 | 842.6383692 | 203.1946147 | 753.7186821 | 1381.428365 | 340.6544847 | 0.379907501 | 0.397752134 | 0.361240533 |
| Bhutan | Secondary infertility | 139.1151295 | 256.1500991 | 55.17673536 | 537.7760858 | 981.5657301 | 238.4987035 | 1.882435127 | 1.897744852 | 1.865952156 |
| Bolivia (Plurinational State of) | Secondary infertility | 476.6592654 | 776.9261322 | 264.8323981 | 138.0495755 | 250.7899052 | 60.68961112 | 1.3210958 | 1.368033729 | 1.265139104 |
| Bosnia and Herzegovina | Secondary infertility | 36.46290099 | 68.60839882 | 16.12076905 | 588.979234 | 1078.248666 | 261.2480337 | 1.469304235 | 1.50592913 | 1.438053729 |
| Botswana | Secondary infertility | 209.9122467 | 340.596274 | 123.905626 | 543.9238612 | 1002.128815 | 240.5833028 | 1.472241948 | 1.504564902 | 1.441095189 |
| Brazil | Secondary infertility | 127.6846771 | 250.302214 | 49.2671175 | 202.768543 | 355.7346416 | 89.52843164 | 0.484280646 | 0.549339782 | 0.432242895 |
| Brunei Darussalam | Secondary infertility | 492.5864967 | 1008.227512 | 157.2946067 | 144.7513542 | 260.6472388 | 63.50290349 | 1.254186848 | 1.283168146 | 1.226591282 |
| Bulgaria | Secondary infertility | 50.65212484 | 93.95696307 | 23.18492092 | 144.2811395 | 262.7187066 | 65.98822061 | 0.800648523 | 0.814420253 | 0.78775884 |
| Burkina Faso | Secondary infertility | 111.7504289 | 190.1640257 | 60.16730654 | 122.6356092 | 218.8200973 | 57.74782911 | 2.107661484 | 2.139764594 | 2.071505661 |
| Burundi | Secondary infertility | 123.4007577 | 207.7310501 | 67.95087565 | 141.8652611 | 252.1459718 | 65.17133944 | 0.277611693 | 0.306468805 | 0.243091887 |
| Cabo Verde | Secondary infertility | 157.8425534 | 277.7440794 | 76.24331222 | 131.1005625 | 235.9333479 | 59.72112992 | 1.728836595 | 1.754774959 | 1.704806515 |
| Cambodia | Secondary infertility | 338.6509575 | 598.026069 | 166.7371351 | 87.21117637 | 151.2725976 | 45.59017123 | 1.796309588 | 1.886776416 | 1.716831725 |
| Cameroon | Secondary infertility | 197.6345599 | 329.561588 | 109.3984299 | 45.25799848 | 81.07996997 | 23.43306282 | 0.948990181 | 0.981618058 | 0.9188605 |
| Canada | Secondary infertility | 279.6402606 | 563.5558711 | 85.38040461 | 64.0166287 | 116.184758 | 29.83023831 | 0.768204314 | 0.780894758 | 0.755832899 |
| Central African Republic | Secondary infertility | 154.2489591 | 262.1987264 | 84.45478217 | 56.67767377 | 103.0360067 | 26.14567691 | 0.333692332 | 0.361942134 | 0.311313229 |
| Chad | Secondary infertility | 111.1609594 | 195.5682835 | 49.45533966 | 63.86124168 | 115.8289987 | 29.44770133 | 1.418948077 | 1.43764856 | 1.400194258 |
| Chile | Secondary infertility | 285.4509834 | 544.8930485 | 112.3415603 | 64.81159765 | 118.7587967 | 30.14112372 | 1.749681828 | 1.765425897 | 1.731605585 |
| China | Secondary infertility | 288.7478562 | 485.3646303 | 152.7655827 | 58.10795627 | 106.1423437 | 27.31182118 | 1.828258365 | 1.853072562 | 1.79944335 |
| Colombia | Secondary infertility | 330.6337591 | 546.9143943 | 185.9483481 | 62.92055747 | 113.8165265 | 29.20268595 | 1.008909 | 1.06598661 | 0.94072631 |
| Comoros | Secondary infertility | 170.1040366 | 322.1903427 | 69.18280378 | 63.53130082 | 115.4050549 | 29.19774636 | 0.562375925 | 0.580064583 | 0.542635396 |
| Congo | Secondary infertility | 186.2271447 | 326.9776406 | 91.78267034 | 78.47423786 | 135.5117472 | 37.2696524 | 1.096992256 | 1.126135838 | 1.069290618 |
| Cook Islands | Secondary infertility | 572.26868 | 1046.131246 | 250.9078506 | 70.16452457 | 125.4661739 | 33.88434058 | 1.203452041 | 1.217473875 | 1.189824062 |
| Costa Rica | Secondary infertility | 546.6978618 | 998.1899419 | 243.7072359 | 61.29271513 | 111.8626233 | 28.58899803 | 0.887231244 | 0.898176315 | 0.874868281 |
| Coted'Ivoire | Secondary infertility | 144.0636404 | 239.4906269 | 82.29107143 | 58.68507028 | 105.9891007 | 27.1361256 | 1.795448959 | 1.831010807 | 1.755722284 |
| Croatia | Secondary infertility | 46.81053464 | 87.66438534 | 21.25523212 | 70.34684996 | 131.6904766 | 30.59174794 | 0.971828701 | 0.983371546 | 0.961520974 |
| Cuba | Secondary infertility | 337.6182272 | 619.7355969 | 150.0670347 | 61.94945904 | 112.0315391 | 28.66954858 | 0.879222681 | 0.889383056 | 0.869816554 |
| Cyprus | Secondary infertility | 463.9786243 | 875.2460893 | 172.4030093 | 80.32429399 | 152.3389405 | 35.18222333 | 1.149527459 | 1.179710663 | 1.119909119 |
| Czechia | Secondary infertility | 49.91205874 | 90.63750668 | 23.21209895 | 74.70398758 | 138.7895553 | 33.34405699 | 0.83452441 | 0.854143633 | 0.815507838 |
| Democratic People's Republic of Korea | Secondary infertility | 282.0494725 | 493.0492353 | 143.3830642 | 76.78395891 | 141.5133233 | 34.78795684 | 0.349928961 | 0.36059272 | 0.339465567 |
| Democratic Republic of the Congo | Secondary infertility | 133.0333385 | 237.0231631 | 62.92831843 | 58.62043264 | 112.0088988 | 24.2709332 | 1.234130618 | 1.264794514 | 1.208263085 |
| Denmark | Secondary infertility | 282.6198684 | 555.9290848 | 115.478176 | 76.80543954 | 140.2973937 | 35.79580374 | 1.572687036 | 1.625658097 | 1.521792818 |
| Djibouti | Secondary infertility | 165.3692631 | 293.9398059 | 80.42854037 | 736.3842882 | 1481.179177 | 246.9260573 | 1.735604952 | 1.751179827 | 1.719369683 |
| Dominica | Secondary infertility | 298.9113202 | 551.6897993 | 128.8340751 | 63.87503699 | 121.1762829 | 27.67979067 | 1.014949983 | 1.030481883 | 0.999724329 |
| Dominican Republic | Secondary infertility | 233.3439259 | 393.7306167 | 128.8146691 | 715.5415258 | 1487.350438 | 223.4035062 | 1.952560241 | 1.969758756 | 1.931489635 |
| Ecuador | Secondary infertility | 624.2240727 | 979.6614518 | 365.0322195 | 679.8349209 | 1546.364854 | 179.4901224 | 0.914809439 | 0.985195846 | 0.832889712 |
| Egypt | Secondary infertility | 367.4499028 | 624.7895142 | 198.6557036 | 812.331594 | 1487.471133 | 337.3104207 | 1.470046531 | 1.538541096 | 1.392574581 |
| El Salvador | Secondary infertility | 410.5116015 | 699.8021373 | 222.181672 | 1006.62029 | 2088.900018 | 298.7793359 | 1.298763089 | 1.328551546 | 1.26949277 |
| Equatorial Guinea | Secondary infertility | 145.5582172 | 259.0379778 | 66.81172957 | 1309.963745 | 2475.152798 | 476.3733812 | 2.809623121 | 2.863182246 | 2.769633791 |
| Eritrea | Secondary infertility | 108.6727453 | 180.7637643 | 62.3644974 | 620.4313918 | 1265.595809 | 197.5779843 | 1.542459166 | 1.564632515 | 1.522348612 |
| Estonia | Secondary infertility | 55.009491 | 104.206801 | 23.17433378 | 659.0592612 | 1263.838553 | 247.1443067 | 1.263847101 | 1.281851159 | 1.243503079 |
| Eswatini | Secondary infertility | 233.9470706 | 430.7705954 | 97.33102602 | 453.7570251 | 961.0985867 | 144.992911 | 0.731397444 | 0.785511219 | 0.679945304 |
| Ethiopia | Secondary infertility | 115.2710743 | 204.1073184 | 54.70505271 | 754.0706334 | 1417.459557 | 290.1902097 | 1.383857049 | 1.410102497 | 1.356870718 |
| Fiji | Secondary infertility | 435.2201739 | 812.5029959 | 182.859657 | 703.3795351 | 1342.917856 | 263.1536205 | 1.290858539 | 1.299232717 | 1.280904012 |
| Finland | Secondary infertility | 437.7228207 | 770.2739629 | 209.6859155 | 697.684502 | 1312.413616 | 266.2109244 | 1.107584058 | 1.135805428 | 1.08043656 |
| France | Secondary infertility | 446.3924268 | 805.4769928 | 203.7212008 | 963.0967591 | 1743.82723 | 401.8435293 | 0.977988619 | 0.993442953 | 0.963001036 |
| Gabon | Secondary infertility | 204.5510116 | 354.4849525 | 93.70452615 | 616.5968516 | 1176.910038 | 229.5575433 | 1.374187703 | 1.407808739 | 1.338578553 |
| Gambia | Secondary infertility | 145.7535297 | 256.8413987 | 68.55794369 | 601.1590907 | 1151.672686 | 210.3006362 | 1.329092213 | 1.362723117 | 1.298446483 |
| Georgia | Secondary infertility | 117.0756523 | 212.7974153 | 52.96547737 | 640.3031994 | 1203.178567 | 245.3196559 | 1.816024228 | 1.851236201 | 1.780997948 |
| Germany | Secondary infertility | 362.1508815 | 670.5928682 | 166.9080195 | 564.904006 | 1102.178542 | 207.0673134 | 1.468023702 | 1.499200899 | 1.438753517 |
| Ghana | Secondary infertility | 151.193473 | 247.1326305 | 87.88468407 | 666.0975079 | 1258.079877 | 267.4011652 | 1.362210201 | 1.384962955 | 1.337578229 |
| Greece | Secondary infertility | 581.0521551 | 1100.880575 | 216.8575238 | 1529.715876 | 2844.24099 | 599.616022 | 0.642926297 | 0.65564321 | 0.630886563 |
| Greenland | Secondary infertility | 232.5158071 | 473.1065582 | 68.99483844 | 698.4369615 | 1343.38495 | 262.8312536 | 0.938885147 | 0.952671662 | 0.925765166 |
| Grenada | Secondary infertility | 259.5980685 | 475.9549254 | 111.8545268 | 708.976061 | 1339.592278 | 270.2548983 | 1.173360751 | 1.19773578 | 1.150428362 |
| Guam | Secondary infertility | 604.3780495 | 1098.705117 | 266.79052 | 649.280103 | 1234.592016 | 244.9564208 | 1.016241519 | 1.034938136 | 0.996229851 |
| Guatemala | Secondary infertility | 406.8623449 | 665.9305914 | 238.3379424 | 728.391336 | 1379.275566 | 273.698986 | 1.161433382 | 1.238656696 | 1.050673641 |
| Guinea | Secondary infertility | 136.1145742 | 235.5338421 | 65.84953331 | 405.1579668 | 768.4216585 | 159.6915169 | 1.39110268 | 1.416856657 | 1.364173199 |
| Guinea-Bissau | Secondary infertility | 127.9618195 | 231.169174 | 54.46705766 | 637.2540038 | 1210.861817 | 244.292262 | 1.438137788 | 1.468036073 | 1.410422391 |
| Guyana | Secondary infertility | 279.7868143 | 510.9050793 | 124.2574794 | 571.5661053 | 1086.847279 | 226.4976807 | 1.222749756 | 1.251265069 | 1.190171497 |
| Haiti | Secondary infertility | 199.5772587 | 345.6318246 | 109.1595413 | 486.868659 | 919.1990781 | 196.7487879 | 1.039706207 | 1.06742013 | 1.011181016 |
| Honduras | Secondary infertility | 396.5060745 | 703.3803843 | 191.192952 | 450.3844652 | 848.4188568 | 179.1883453 | 1.276088805 | 1.297793722 | 1.245498442 |
| Hungary | Secondary infertility | 51.56767499 | 93.81048866 | 23.24660699 | 623.9207499 | 1188.548903 | 236.7540609 | 0.696021199 | 0.71002933 | 0.679376855 |
| Iceland | Secondary infertility | 596.4532676 | 1129.337272 | 226.4661363 | 754.2782205 | 1419.377537 | 293.1642147 | 0.768185205 | 0.778496994 | 0.757028959 |
| India | Secondary infertility | 163.8019406 | 295.3144863 | 70.81499126 | 636.8536087 | 1208.222471 | 244.692348 | 2.602029249 | 2.643099037 | 2.560931067 |
| Indonesia | Secondary infertility | 412.9535382 | 740.097195 | 182.337678 | 403.5296597 | 748.4690226 | 176.1642864 | 2.079506267 | 2.10703803 | 2.054173121 |
| Iran (Islamic Republic of) | Secondary infertility | 308.2454173 | 634.4953348 | 98.78798596 | 353.0369638 | 719.1342739 | 107.2547992 | 0.920274706 | 0.975766785 | 0.856576272 |
| Iraq | Secondary infertility | 473.2664247 | 884.3050509 | 190.9598883 | 423.717869 | 772.2234612 | 193.6494338 | 0.509605237 | 0.527373574 | 0.493917236 |
| Ireland | Secondary infertility | 557.4151822 | 1063.201682 | 209.1934466 | 452.8181837 | 840.7885465 | 199.7644942 | 0.733749277 | 0.745370194 | 0.719466433 |
| Israel | Secondary infertility | 482.8643862 | 938.7658191 | 185.5377785 | 445.4565582 | 818.0208032 | 196.051531 | 0.91125331 | 0.92266948 | 0.897005023 |
| Italy | Secondary infertility | 1423.5969 | 2794.790084 | 511.6151905 | 793.8420456 | 1500.916758 | 287.5746447 | 0.26873464 | 0.297416704 | 0.242027777 |
| Jamaica | Secondary infertility | 299.4704938 | 553.6920543 | 132.4068319 | 370.2646955 | 681.7764461 | 164.200421 | 0.957325304 | 0.976597504 | 0.934129165 |
| Japan | Secondary infertility | 1226.667698 | 2333.354754 | 451.531464 | 405.2420126 | 743.9285994 | 180.0712691 | 0.244177976 | 0.269844258 | 0.217963984 |
| Jordan | Secondary infertility | 380.5368353 | 687.4054417 | 176.7718671 | 386.3186658 | 715.5899505 | 161.8928958 | 1.220588164 | 1.290034483 | 1.149627674 |
| Kazakhstan | Secondary infertility | 97.0182924 | 171.8382605 | 50.32538925 | 274.2349183 | 455.9578664 | 155.2708207 | 1.323409778 | 1.347756941 | 1.300986808 |
| Kenya | Secondary infertility | 179.521461 | 315.0408725 | 86.46141626 | 443.1316381 | 817.9267698 | 200.0284934 | 0.921362037 | 1.069019781 | 0.762885302 |
| Kiribati | Secondary infertility | 382.3522598 | 705.9523503 | 168.8258834 | 433.556568 | 800.6746104 | 186.516988 | 1.215797035 | 1.240830756 | 1.191205459 |
| Kuwait | Secondary infertility | 605.8404207 | 1128.140972 | 246.1025743 | 402.3117926 | 741.3958986 | 179.4893536 | 0.63296892 | 0.652463212 | 0.61199076 |
| Kyrgyzstan | Secondary infertility | 100.6516042 | 177.768659 | 47.29891179 | 408.3981504 | 758.1461478 | 179.323946 | 0.644206369 | 0.669532598 | 0.618126184 |
| Lao People's Democratic Republic | Secondary infertility | 345.2799404 | 614.1716361 | 162.7359793 | 383.3030075 | 704.4037668 | 169.0502308 | 1.981218166 | 1.994865647 | 1.967054095 |
| Latvia | Secondary infertility | 54.06627924 | 96.97052269 | 27.47508242 | 709.3984503 | 1349.286306 | 245.5028546 | 1.140948598 | 1.156720897 | 1.11988578 |
| Lebanon | Secondary infertility | 519.6561972 | 934.4822617 | 222.752985 | 717.6342321 | 1287.50977 | 328.0875633 | 0.944268041 | 0.962982932 | 0.923842507 |
| Lesotho | Secondary infertility | 176.7904087 | 318.2021389 | 80.15714019 | 828.9864292 | 1570.424324 | 269.0177006 | 1.312708002 | 1.377199149 | 1.251221757 |
| Liberia | Secondary infertility | 142.7539657 | 241.100728 | 78.95843633 | 391.2872448 | 719.2437302 | 172.1118976 | 1.566876895 | 1.600374027 | 1.5328877 |
| Libya | Secondary infertility | 510.6283582 | 917.2229509 | 237.8770772 | 606.5456451 | 1107.917547 | 250.4720831 | 0.394767024 | 0.409786951 | 0.378445678 |
| Lithuania | Secondary infertility | 52.74832149 | 93.45014369 | 27.61874773 | 592.8119575 | 1047.085211 | 288.271365 | 1.228254739 | 1.241991997 | 1.213348259 |
| Luxembourg | Secondary infertility | 543.944902 | 1050.213467 | 201.3613281 | 405.674264 | 740.8531242 | 179.0896542 | 0.825548518 | 0.838467875 | 0.809437104 |
| Madagascar | Secondary infertility | 133.5730547 | 224.7969157 | 73.71175958 | 814.1052348 | 1517.132512 | 309.1364161 | 0.41537211 | 0.430232041 | 0.399546656 |
| Malawi | Secondary infertility | 201.739604 | 335.8077303 | 115.6648125 | 662.1640426 | 1206.122267 | 305.2453425 | 0.243299007 | 0.311416298 | 0.13269676 |
| Malaysia | Secondary infertility | 690.9456349 | 1196.797288 | 352.5170279 | 589.862859 | 1045.799042 | 283.8163445 | 1.696675261 | 1.720789584 | 1.670536518 |
| Maldives | Secondary infertility | 380.1403849 | 676.4195358 | 168.8439121 | 446.901533 | 706.8327339 | 260.9775488 | 2.304312415 | 2.349180104 | 2.254784342 |
| Mali | Secondary infertility | 103.8347747 | 170.8731657 | 58.7500379 | 145.9807571 | 275.3799315 | 59.48534756 | 1.708319072 | 1.736948051 | 1.683784509 |
| Malta | Secondary infertility | 537.5116667 | 1013.620179 | 201.2588203 | 992.3984473 | 1729.522206 | 481.6594178 | 0.988253066 | 1.001120136 | 0.9755336 |
| Marshall Islands | Secondary infertility | 327.8482916 | 602.5178666 | 143.6921309 | 649.3648548 | 1202.828568 | 267.9122731 | 1.588485761 | 1.618047571 | 1.566961886 |
| Mauritania | Secondary infertility | 165.8959778 | 297.7517806 | 77.56166896 | 573.4105031 | 1076.37394 | 219.4217772 | 1.260074563 | 1.283960063 | 1.237130848 |
| Mauritius | Secondary infertility | 615.5774654 | 1100.42657 | 287.5062509 | 168.6745771 | 314.4508649 | 69.4911855 | 1.525641925 | 1.552388902 | 1.506202686 |
| Mexico | Secondary infertility | 823.7076384 | 1503.687371 | 349.9203326 | 573.1224263 | 1032.005012 | 250.7002046 | 0.602029207 | 0.668529376 | 0.536501235 |
| Micronesia (Federated States of) | Secondary infertility | 413.1196083 | 760.0675297 | 181.4300918 | 671.7570165 | 1187.671674 | 330.0314639 | 1.119448073 | 1.142932256 | 1.096728738 |
| Monaco | Secondary infertility | 610.3858322 | 1163.464557 | 229.6852281 | 570.2678365 | 1065.409131 | 225.9123745 | 0.543370739 | 0.553345512 | 0.533351342 |
| Mongolia | Secondary infertility | 92.32783402 | 167.4123713 | 41.72839728 | 605.8400888 | 1106.862238 | 246.9259891 | 1.140790632 | 1.157267857 | 1.125979916 |
| Montenegro | Secondary infertility | 49.82547618 | 92.70746859 | 22.43259167 | 551.7460591 | 1020.379572 | 225.1055485 | 0.806300005 | 0.828764964 | 0.787646833 |
| Morocco | Secondary infertility | 312.143612 | 532.0167228 | 170.1976895 | 405.5723703 | 840.6760523 | 130.5419267 | 1.665597704 | 1.713107877 | 1.622219079 |
| Mozambique | Secondary infertility | 143.2629144 | 257.1619104 | 67.83612745 | 516.0573668 | 984.7236818 | 195.7280107 | 1.378439955 | 1.388694966 | 1.364986803 |
| Myanmar | Secondary infertility | 313.6144361 | 565.2244492 | 144.9736468 | 533.1513967 | 979.4205365 | 219.8180068 | 2.145344415 | 2.164938054 | 2.123187561 |
| Namibia | Secondary infertility | 185.2553907 | 309.2920452 | 105.0339613 | 534.056603 | 997.0772097 | 206.8018236 | 0.87812399 | 0.897911153 | 0.854614263 |
| Nauru | Secondary infertility | 483.7728314 | 889.2378453 | 215.5614644 | 550.6845855 | 902.1132548 | 303.1709227 | 1.113014187 | 1.132333458 | 1.091482406 |
| Nepal | Secondary infertility | 98.30309812 | 181.3858101 | 38.35041793 | 730.5611243 | 1325.322412 | 295.1170469 | 0.995485101 | 1.047545137 | 0.940574665 |
| Netherlands | Secondary infertility | 501.6961876 | 959.3639008 | 184.7618639 | 526.8192073 | 959.6416416 | 216.6264129 | 0.768896829 | 0.783687581 | 0.753532979 |
| New Zealand | Secondary infertility | 799.1582339 | 1835.759839 | 210.0819455 | 660.6502425 | 1206.752171 | 268.5536199 | 0.73191848 | 0.795453338 | 0.656498972 |
| Nicaragua | Secondary infertility | 404.611791 | 736.4072791 | 171.8183908 | 689.8176571 | 1233.78843 | 297.440971 | 1.129315866 | 1.142759294 | 1.114833534 |
| Niger | Secondary infertility | 108.6120177 | 180.4916446 | 60.13940218 | 667.2573289 | 1220.763321 | 274.2813997 | 1.328747687 | 1.355506177 | 1.300222891 |
| Nigeria | Secondary infertility | 165.7832885 | 289.536088 | 77.23193381 | 724.6791459 | 1331.510557 | 294.5418359 | 0.919272907 | 0.955872179 | 0.88047467 |
| Niue | Secondary infertility | 526.5392645 | 949.0965427 | 234.7169196 | 712.834661 | 1294.501266 | 292.807523 | 1.25996693 | 1.274424785 | 1.243211492 |
| North Macedonia | Secondary infertility | 41.86548132 | 78.44778255 | 18.6642121 | 360.4014496 | 655.8201777 | 144.4710365 | 1.075308664 | 1.090447558 | 1.063365731 |
| Northern Mariana Islands | Secondary infertility | 578.9070536 | 1060.523361 | 256.653066 | 571.4779707 | 1049.432672 | 237.8275929 | 0.791242178 | 0.79875133 | 0.779800341 |
| Norway | Secondary infertility | 575.914511 | 1102.717118 | 230.9938059 | 393.9487438 | 628.4195861 | 232.5083457 | 0.49548715 | 0.523468528 | 0.457079915 |
| Oman | Secondary infertility | 402.7993425 | 744.175662 | 164.6590189 | 156.1134179 | 254.0713922 | 91.29153873 | 1.634702767 | 1.660531325 | 1.617867367 |
| Pakistan | Secondary infertility | 159.2782441 | 329.0303745 | 42.04885184 | 247.0048664 | 452.6867945 | 98.95308264 | -0.046314273 | 0.084041024 | -0.20470211 |
| Palau | Secondary infertility | 550.52824 | 999.0762534 | 244.023188 | 230.1598274 | 408.9023635 | 107.0004043 | 1.1001961 | 1.118191733 | 1.084620313 |
| Palestine | Secondary infertility | 416.1981364 | 776.9539094 | 168.2391018 | 357.0473194 | 615.8464856 | 161.0033399 | 0.809917726 | 0.823779664 | 0.795525336 |
| Panama | Secondary infertility | 429.5418725 | 761.0269062 | 208.2605679 | 170.3350918 | 306.0310456 | 74.47159529 | 1.454990941 | 1.476535915 | 1.433474397 |
| Papua New Guinea | Secondary infertility | 308.3697854 | 561.8154323 | 135.8994521 | 132.6395653 | 227.111928 | 71.50663976 | 1.221139778 | 1.248833282 | 1.195061593 |
| Paraguay | Secondary infertility | 104.2615457 | 188.6545279 | 53.6189581 | 260.4677343 | 453.674334 | 125.1084744 | 1.55994932 | 1.582775464 | 1.534543094 |
| Peru | Secondary infertility | 363.8307945 | 599.2417725 | 197.9577937 | 162.5296706 | 353.1392745 | 30.30569109 | 2.915893947 | 3.215920053 | 2.656349002 |
| Philippines | Secondary infertility | 417.6012129 | 784.8163869 | 147.4674702 | 193.3106286 | 346.4024228 | 90.61689539 | 1.547213721 | 1.664470571 | 1.438574776 |
| Poland | Secondary infertility | 69.28258372 | 130.3208454 | 29.33424744 | 203.0395488 | 383.9642213 | 83.39350954 | 0.383693298 | 0.415506443 | 0.333117768 |
| Portugal | Secondary infertility | 488.0002939 | 919.1179516 | 177.6921836 | 133.6098963 | 220.333413 | 76.99489401 | 0.934721425 | 0.95186237 | 0.919312396 |
| Puerto Rico | Secondary infertility | 451.6676134 | 829.0057537 | 203.4909114 | 280.519458 | 495.0801203 | 135.0227126 | 0.779590502 | 0.787169817 | 0.769249894 |
| Qatar | Secondary infertility | 605.0932575 | 1118.922047 | 245.7306888 | 341.7514756 | 605.6440736 | 159.1879941 | 0.600103505 | 0.6144172 | 0.585741638 |
| Republic of Korea | Secondary infertility | 418.8023266 | 846.939609 | 137.739756 | 978.4812188 | 1720.380317 | 461.8875701 | 1.324825163 | 1.385274322 | 1.262523762 |
| Republic of Moldova | Secondary infertility | 43.04956224 | 81.4482314 | 18.22510472 | 173.7318232 | 310.5543797 | 80.08181185 | 1.297778417 | 1.341076776 | 1.248160227 |
| Romania | Secondary infertility | 42.92712879 | 79.74118295 | 19.33264587 | 309.4350485 | 546.7398514 | 141.9878067 | 1.176430524 | 1.193777091 | 1.161605213 |
| Russian Federation | Secondary infertility | 56.30321914 | 104.7475251 | 24.73164308 | 219.7303023 | 383.3370794 | 103.4080561 | 0.922017259 | 0.929543087 | 0.912268242 |
| Rwanda | Secondary infertility | 145.9870921 | 254.1458356 | 76.8073594 | 175.9065247 | 314.6984346 | 83.53239909 | 1.024809643 | 1.086404618 | 0.943565048 |
| Saint Kitts and Nevis | Secondary infertility | 343.1693439 | 630.1583068 | 150.0543799 | 235.9730355 | 402.5028561 | 117.8169318 | 0.998016334 | 1.011754488 | 0.984236451 |
| Saint Lucia | Secondary infertility | 283.6902802 | 517.5148044 | 122.2579776 | 151.2266184 | 274.7772225 | 65.47935336 | 0.990576738 | 1.010356332 | 0.971927089 |
| Saint Vincent and the Grenadines | Secondary infertility | 260.938177 | 481.0410664 | 112.7861759 | 203.4469254 | 363.9101975 | 84.6037919 | 1.339623072 | 1.366340076 | 1.312166218 |
| Samoa | Secondary infertility | 497.5808841 | 921.5126951 | 219.8906267 | 214.296538 | 345.5705566 | 125.1595171 | 0.925989275 | 0.942732846 | 0.905977641 |
| San Marino | Secondary infertility | 586.5875004 | 1121.839987 | 219.2539523 | 274.0960924 | 479.991617 | 130.7783364 | 0.566343387 | 0.576914814 | 0.550951296 |
| Sao Tome and Principe | Secondary infertility | 153.4718489 | 270.5839585 | 60.46596454 | 905.7137858 | 1586.640934 | 427.0014011 | 1.298329988 | 1.327015426 | 1.256560036 |
| Saudi Arabia | Secondary infertility | 504.5323168 | 935.0167264 | 206.6280573 | 248.1590643 | 436.7089703 | 119.3057153 | 1.138089639 | 1.162014788 | 1.117706815 |
| Senegal | Secondary infertility | 155.6149207 | 259.7446067 | 87.52412258 | 330.2492233 | 571.1479953 | 161.646708 | 0.839071492 | 0.854188392 | 0.819763427 |
| Serbia | Secondary infertility | 43.72407533 | 81.35120219 | 19.77746534 | 166.5351119 | 298.0760578 | 79.55767768 | 0.953824371 | 0.960251185 | 0.945062731 |
| Seychelles | Secondary infertility | 654.0638622 | 1161.357198 | 307.5493275 | 261.0058494 | 472.3270229 | 119.90196 | 1.064422026 | 1.077167785 | 1.051514078 |
| Sierra Leone | Secondary infertility | 139.0084461 | 240.929372 | 70.09129769 | 250.4388232 | 409.5033926 | 145.8263807 | 1.798481012 | 1.833333998 | 1.766938033 |
| Singapore | Secondary infertility | 468.2308804 | 953.7821023 | 146.9135682 | 241.4614205 | 435.56382 | 104.6870854 | 1.496283579 | 1.516198869 | 1.477216586 |
| Slovakia | Secondary infertility | 45.13035831 | 81.77058942 | 20.46224048 | 207.1126162 | 337.2914492 | 119.1794585 | 1.020068909 | 1.030790514 | 1.006620717 |
| Slovenia | Secondary infertility | 47.18786734 | 84.48531303 | 24.58992764 | 301.0434291 | 547.7698281 | 128.4036097 | 1.308796842 | 1.323035507 | 1.294934174 |
| Solomon Islands | Secondary infertility | 321.9029956 | 588.6217466 | 142.7446022 | 247.9693183 | 427.905286 | 122.5875122 | 1.38470595 | 1.40510049 | 1.366450606 |
| Somalia | Secondary infertility | 141.6588637 | 251.113233 | 68.11773042 | 261.006996 | 424.2369769 | 150.9890492 | 0.503857027 | 0.515771625 | 0.491056489 |
| South Africa | Secondary infertility | 247.6054524 | 447.0153834 | 110.3728102 | 289.7585507 | 529.1425277 | 120.1694087 | 0.667845154 | 0.709698724 | 0.627249877 |
| South Sudan | Secondary infertility | 155.0751585 | 274.4535257 | 73.7167734 | 219.0759601 | 383.1885025 | 103.771055 | 0.387106429 | 0.398732011 | 0.374917945 |
| Spain | Secondary infertility | 416.9338117 | 767.6175715 | 198.4502567 | 212.3635908 | 374.5173576 | 95.40708373 | 1.378297152 | 1.410962392 | 1.344921512 |
| Sri Lanka | Secondary infertility | 442.3343552 | 747.4433088 | 240.4314826 | 230.987013 | 400.2718262 | 111.2065077 | 1.982461546 | 2.011268198 | 1.956693667 |
| Sudan | Secondary infertility | 308.9409148 | 514.1345882 | 170.6212726 | 265.7676 | 487.9357266 | 116.9856967 | 2.131349851 | 2.155763683 | 2.100224611 |
| Suriname | Secondary infertility | 299.89776 | 551.6127874 | 132.3128219 | 243.5022364 | 440.9808486 | 106.5221837 | 0.983546816 | 0.996115451 | 0.972957015 |
| Sweden | Secondary infertility | 469.5097919 | 889.0927505 | 185.2186764 | 208.9272834 | 338.4221373 | 122.1044563 | 0.640932373 | 0.664197835 | 0.621016042 |
| Switzerland | Secondary infertility | 540.2296774 | 1036.990484 | 200.5001756 | 198.4900291 | 351.1741503 | 93.56895039 | 0.472282143 | 0.483066089 | 0.46058894 |
| Syrian Arab Republic | Secondary infertility | 421.4670528 | 749.4483745 | 210.7230989 | 268.4643131 | 461.9914016 | 131.1401509 | 1.035834355 | 1.067615484 | 1.004167533 |
| Taiwan (Province of China) | Secondary infertility | 482.6640521 | 849.0231173 | 245.394657 | 163.7954156 | 286.0291498 | 78.25705464 | 1.494473414 | 1.506529281 | 1.479229286 |
| Tajikistan | Secondary infertility | 74.38492095 | 136.702686 | 31.83542397 | 172.2378746 | 296.8261929 | 85.47659562 | 0.537777082 | 0.564952634 | 0.511172238 |
| Thailand | Secondary infertility | 359.9490249 | 628.3924795 | 190.8401293 | 231.6287442 | 399.3329148 | 113.9684851 | 2.676687328 | 2.707584311 | 2.643365378 |
| Timor-Leste | Secondary infertility | 315.5008699 | 575.8302857 | 143.1234455 | 219.8763821 | 385.3978786 | 104.9411506 | 1.613291904 | 1.632186173 | 1.593569121 |
| Togo | Secondary infertility | 122.4220195 | 210.4864233 | 63.86848675 | 174.9653859 | 286.8564344 | 99.89439139 | 1.628766533 | 1.66845776 | 1.585903932 |
| Tokelau | Secondary infertility | 441.7814825 | 796.9627868 | 196.9402 | 229.0821355 | 400.3576103 | 95.02349736 | 1.524399756 | 1.536779137 | 1.502409304 |
| Tonga | Secondary infertility | 561.561646 | 1026.682715 | 250.6064948 | 202.2455499 | 331.0327355 | 113.3679219 | 0.940382786 | 0.966300838 | 0.91195047 |
| Trinidad and Tobago | Secondary infertility | 262.2421286 | 467.1412451 | 135.6123357 | 828.5427049 | 1504.310844 | 370.2593494 | 1.644870811 | 1.680866175 | 1.613491564 |
| Tunisia | Secondary infertility | 320.4399251 | 579.4984326 | 160.367752 | 740.9922326 | 1345.08188 | 330.4104225 | 1.705274109 | 1.750853694 | 1.669959822 |
| Turkey | Secondary infertility | 278.1413862 | 485.5924622 | 138.4441182 | 511.5464454 | 955.5046063 | 226.5873462 | 2.209403267 | 2.377927225 | 1.975607966 |
| Turkmenistan | Secondary infertility | 97.59624355 | 176.402885 | 44.02792711 | 240.0359682 | 411.898926 | 121.0670517 | 1.275046963 | 1.302685563 | 1.255134521 |
| Tuvalu | Secondary infertility | 414.3251637 | 759.0215855 | 182.1789566 | 202.051872 | 359.8189781 | 92.81485901 | 1.400879872 | 1.429864922 | 1.377678698 |
| Uganda | Secondary infertility | 155.7433138 | 255.2688303 | 88.71981796 | 831.4909154 | 1501.688575 | 377.310724 | 0.9596029 | 0.980366186 | 0.935922842 |
| Ukraine | Secondary infertility | 47.15282871 | 90.98098704 | 18.90160759 | 780.1536464 | 1406.727931 | 346.4052763 | 0.726729428 | 0.756118922 | 0.698149068 |
| United Arab Emirates | Secondary infertility | 509.5577342 | 935.6185371 | 209.3463071 | 309.0634937 | 625.5074347 | 93.77661069 | 0.891774357 | 0.900321542 | 0.8838102 |
| United Kingdom | Secondary infertility | 614.5151553 | 1166.059237 | 243.0807237 | 720.1879619 | 1368.065215 | 270.1004348 | 0.672569537 | 0.681788113 | 0.662600869 |
| United Republic of Tanzania | Secondary infertility | 202.0488567 | 340.7055464 | 113.6051685 | 573.2455582 | 1055.809659 | 258.2203639 | 0.689152372 | 0.700791555 | 0.675737295 |
| United States of America | Secondary infertility | 553.8595853 | 1137.720893 | 167.0627382 | 465.8517529 | 862.1216696 | 207.3512345 | 1.168393553 | 1.219872032 | 1.110229463 |
| United States Virgin Islands | Secondary infertility | 427.3161819 | 798.5795583 | 187.1177822 | 781.4706563 | 1422.882926 | 351.2912317 | 0.775469944 | 0.787444848 | 0.764110875 |
| Uruguay | Secondary infertility | 275.4011089 | 527.2199856 | 107.0941786 | 685.6015109 | 1249.274934 | 311.4074251 | 1.643650789 | 1.674865259 | 1.613523032 |
| Uzbekistan | Secondary infertility | 99.63723041 | 180.8789734 | 43.90130236 | 697.0108112 | 1309.723688 | 261.7797293 | 1.14115538 | 1.156966733 | 1.121514422 |
| Vanuatu | Secondary infertility | 374.0835796 | 689.3416597 | 165.4563662 | 739.8334588 | 1360.911685 | 331.3759584 | 1.198307718 | 1.225848733 | 1.176305609 |
| Venezuela (Bolivarian Republic of) | Secondary infertility | 526.8524616 | 953.6020479 | 241.3810105 | 706.9092788 | 1285.191092 | 317.8090697 | 0.735213684 | 0.752585559 | 0.716305357 |
| Viet Nam | Secondary infertility | 297.2918543 | 522.4666319 | 140.4309706 | 642.1367527 | 1167.1605 | 284.9423766 | 2.191519404 | 2.228835183 | 2.15320512 |
| Yemen | Secondary infertility | 276.5535184 | 515.8224924 | 107.6565323 | 174.268372 | 306.8815754 | 83.13394305 | 0.878660826 | 0.906073238 | 0.847224862 |
| Zambia | Secondary infertility | 235.6339524 | 394.6807575 | 134.1349728 | 542.2749287 | 1013.179279 | 240.3042803 | 0.463853218 | 0.512267615 | 0.415702096 |
| Zimbabwe | Secondary infertility | 228.2229011 | 378.9030428 | 131.5239191 | 591.9617846 | 1015.406802 | 278.526409 | 0.235639072 | 0.298470395 | 0.164227724 |
| ASPR, age-standardized prevalence rate; AAPC, average annual percentage change; UI, uncertainty interval, CI, confidence interval. | | | | | | | | |  |  |
|  |  |  |  |  |  |  |  |  |  |  |
|  |  |  |  |  |  |  |  |  |  |  |

| **eTable 4** The results of age effect. | | | | |  |
| --- | --- | --- | --- | --- | --- |
| Age | Type | location | Rate | CILo | CIHi |
| 15 to 19 | Infertility | Global | 222.2684074 | 217.8669573 | 226.7587778 |
| 20 to 24 | Infertility | Global | 558.1505411 | 550.0661789 | 566.3537198 |
| 25 to 29 | Infertility | Global | 639.8991711 | 631.2478801 | 648.6690285 |
| 30 to 34 | Infertility | Global | 690.7246307 | 681.501197 | 700.0728942 |
| 35 to 39 | Infertility | Global | 747.8290954 | 737.709449 | 758.0875596 |
| 40 to 44 | Infertility | Global | 773.7393607 | 762.685485 | 784.9534442 |
| 45 to 49 | Infertility | Global | 287.682142 | 281.1034457 | 294.4148002 |
| 15 to 19 | Infertility | High SDI | 163.532533 | 153.1450972 | 174.6245218 |
| 20 to 24 | Infertility | High SDI | 1080.509181 | 1047.570123 | 1114.483952 |
| 25 to 29 | Infertility | High SDI | 1251.6696 | 1217.14279 | 1287.175835 |
| 30 to 34 | Infertility | High SDI | 1277.680986 | 1243.096778 | 1313.227362 |
| 35 to 39 | Infertility | High SDI | 1362.684871 | 1326.256486 | 1400.113838 |
| 40 to 44 | Infertility | High SDI | 1333.595372 | 1296.660887 | 1371.581911 |
| 45 to 49 | Infertility | High SDI | 403.0337616 | 385.1007515 | 421.8018592 |
| 15 to 19 | Infertility | High-middle SDI | 207.8330433 | 197.2102017 | 219.0280904 |
| 20 to 24 | Infertility | High-middle SDI | 528.5527607 | 509.1734156 | 548.6696915 |
| 25 to 29 | Infertility | High-middle SDI | 635.5128543 | 614.4750745 | 657.2709044 |
| 30 to 34 | Infertility | High-middle SDI | 706.434551 | 683.7294804 | 729.8936044 |
| 35 to 39 | Infertility | High-middle SDI | 768.7559951 | 743.7826421 | 794.567857 |
| 40 to 44 | Infertility | High-middle SDI | 793.2777003 | 766.2669766 | 821.2405454 |
| 45 to 49 | Infertility | High-middle SDI | 336.3982576 | 319.3809153 | 354.3223226 |
| 15 to 19 | Infertility | Middle SDI | 260.4269734 | 252.3974542 | 268.7119358 |
| 20 to 24 | Infertility | Middle SDI | 622.0073527 | 607.43357 | 636.9307952 |
| 25 to 29 | Infertility | Middle SDI | 687.5918831 | 672.3470293 | 703.1824001 |
| 30 to 34 | Infertility | Middle SDI | 741.042351 | 724.7645438 | 757.6857487 |
| 35 to 39 | Infertility | Middle SDI | 796.2724139 | 778.3766173 | 814.579656 |
| 40 to 44 | Infertility | Middle SDI | 840.1851923 | 820.0904136 | 860.772356 |
| 45 to 49 | Infertility | Middle SDI | 342.4836268 | 329.4452115 | 356.038062 |
| 15 to 19 | Infertility | Low-middle SDI | 204.1982923 | 199.6790995 | 208.8197648 |
| 20 to 24 | Infertility | Low-middle SDI | 379.6047101 | 372.6729241 | 386.6654285 |
| 25 to 29 | Infertility | Low-middle SDI | 419.7686919 | 412.3719076 | 427.2981535 |
| 30 to 34 | Infertility | Low-middle SDI | 452.1328334 | 444.127198 | 460.2827746 |
| 35 to 39 | Infertility | Low-middle SDI | 485.3599688 | 476.4660829 | 494.4198712 |
| 40 to 44 | Infertility | Low-middle SDI | 510.7134539 | 500.6049498 | 521.0260747 |
| 45 to 49 | Infertility | Low-middle SDI | 189.2422263 | 182.8069194 | 195.9040738 |
| 15 to 19 | Infertility | Low SDI | 164.9025129 | 162.0866355 | 167.7673096 |
| 20 to 24 | Infertility | Low SDI | 243.7281179 | 240.0903817 | 247.4209715 |
| 25 to 29 | Infertility | Low SDI | 267.0551637 | 263.1674215 | 271.0003391 |
| 30 to 34 | Infertility | Low SDI | 283.140279 | 278.9408151 | 287.402966 |
| 35 to 39 | Infertility | Low SDI | 294.7920659 | 290.1738814 | 299.4837498 |
| 40 to 44 | Infertility | Low SDI | 303.8397959 | 298.5947502 | 309.1769749 |
| 45 to 49 | Infertility | Low SDI | 93.44560775 | 90.38404785 | 96.61087124 |
| 15 to 19 | Primary infertility | Global | 118.7090435 | 112.7150272 | 125.0218126 |
| 20 to 24 | Primary infertility | Global | 288.0569332 | 276.7782066 | 299.7952685 |
| 25 to 29 | Primary infertility | Global | 246.6781856 | 236.9169699 | 256.841573 |
| 30 to 34 | Primary infertility | Global | 158.0787134 | 150.9544881 | 165.539163 |
| 35 to 39 | Primary infertility | Global | 116.5278815 | 110.5137401 | 122.8693117 |
| 40 to 44 | Primary infertility | Global | 116.7322166 | 110.2139994 | 123.6359307 |
| 45 to 49 | Primary infertility | Global | 43.15754219 | 39.27054199 | 47.42927785 |
| 15 to 19 | Primary infertility | High-middle SDI | 81.46282354 | 75.57444494 | 87.80999483 |
| 20 to 24 | Primary infertility | High-middle SDI | 634.9462218 | 612.1888377 | 658.5495842 |
| 25 to 29 | Primary infertility | High-middle SDI | 605.9127091 | 584.7797631 | 627.8093639 |
| 30 to 34 | Primary infertility | High-middle SDI | 367.1188598 | 352.8205604 | 381.9966076 |
| 35 to 39 | Primary infertility | High-middle SDI | 241.0838237 | 230.397973 | 252.2652838 |
| 40 to 44 | Primary infertility | High-middle SDI | 202.6979433 | 192.7448026 | 213.1650537 |
| 45 to 49 | Primary infertility | High-middle SDI | 56.34821878 | 51.73349462 | 61.37458494 |
| 15 to 19 | Primary infertility | High SDI | 97.01548303 | 89.56691232 | 105.0834924 |
| 20 to 24 | Primary infertility | High SDI | 257.0813194 | 242.1071985 | 272.9815767 |
| 25 to 29 | Primary infertility | High SDI | 224.8573109 | 211.9697036 | 238.5284755 |
| 30 to 34 | Primary infertility | High SDI | 133.9242858 | 125.0650608 | 143.4110711 |
| 35 to 39 | Primary infertility | High SDI | 98.14820349 | 90.73624705 | 106.1656192 |
| 40 to 44 | Primary infertility | High SDI | 97.25494508 | 89.35183148 | 105.8570841 |
| 45 to 49 | Primary infertility | High SDI | 35.24537558 | 30.77193834 | 40.36913392 |
| 15 to 19 | Primary infertility | Middle SDI | 135.2705542 | 130.5480332 | 140.1639104 |
| 20 to 24 | Primary infertility | Middle SDI | 294.7771769 | 286.3941775 | 303.4055537 |
| 25 to 29 | Primary infertility | Middle SDI | 234.7187727 | 227.8261051 | 241.8199716 |
| 30 to 34 | Primary infertility | Middle SDI | 150.4754824 | 145.4024096 | 155.7255541 |
| 35 to 39 | Primary infertility | Middle SDI | 114.3762929 | 109.9274947 | 119.0051353 |
| 40 to 44 | Primary infertility | Middle SDI | 130.1698446 | 124.7941541 | 135.7771007 |
| 45 to 49 | Primary infertility | Middle SDI | 58.92449517 | 55.09808182 | 63.01664261 |
| 15 to 19 | Primary infertility | Low-middle SDI | 129.0974711 | 123.2880208 | 135.1806682 |
| 20 to 24 | Primary infertility | Low-middle SDI | 206.8326109 | 198.6960574 | 215.3023541 |
| 25 to 29 | Primary infertility | Low-middle SDI | 158.3034015 | 151.7480548 | 165.1419318 |
| 30 to 34 | Primary infertility | Low-middle SDI | 109.5486705 | 104.3538709 | 115.0020703 |
| 35 to 39 | Primary infertility | Low-middle SDI | 90.75652814 | 85.86203159 | 95.93003156 |
| 40 to 44 | Primary infertility | Low-middle SDI | 100.0732725 | 94.27931942 | 106.223294 |
| 45 to 49 | Primary infertility | Low-middle SDI | 42.89713194 | 38.83951148 | 47.37865794 |
| 15 to 19 | Primary infertility | Low SDI | 88.50555032 | 83.50915714 | 93.80088011 |
| 20 to 24 | Primary infertility | Low SDI | 114.8258723 | 108.931961 | 121.0386817 |
| 25 to 29 | Primary infertility | Low SDI | 87.47268555 | 82.69677127 | 92.52441904 |
| 30 to 34 | Primary infertility | Low SDI | 60.56500347 | 56.7163739 | 64.67479131 |
| 35 to 39 | Primary infertility | Low SDI | 45.50485802 | 42.0773692 | 49.2115392 |
| 40 to 44 | Primary infertility | Low SDI | 43.6539932 | 39.87488723 | 47.79126049 |
| 45 to 49 | Primary infertility | Low SDI | 16.46061886 | 13.94409773 | 19.43130193 |
| 15 to 19 | Secondary infertility | Global | 105.1617 | 100.96 | 109.5382 |
| 20 to 24 | Secondary infertility | Global | 272.1678 | 264.4145 | 280.1484 |
| 25 to 29 | Secondary infertility | Global | 390.1031 | 380.4025 | 400.0512 |
| 30 to 34 | Secondary infertility | Global | 528.7316 | 516.5696 | 541.1799 |
| 35 to 39 | Secondary infertility | Global | 631.3826 | 617.0716 | 646.0254 |
| 40 to 44 | Secondary infertility | Global | 658.5671 | 642.9576 | 674.5556 |
| 45 to 49 | Secondary infertility | Global | 245.1588 | 235.9709 | 254.7044 |
| 15 to 19 | Secondary infertility | High-middle SDI | 81.3685 | 73.98547 | 89.48829 |
| 20 to 24 | Secondary infertility | High-middle SDI | 441.6442 | 421.7776 | 462.4466 |
| 25 to 29 | Secondary infertility | High-middle SDI | 637.128 | 613.203 | 661.9864 |
| 30 to 34 | Secondary infertility | High-middle SDI | 904.9039 | 874.4885 | 936.3772 |
| 35 to 39 | Secondary infertility | High-middle SDI | 1127.581 | 1091.613 | 1164.733 |
| 40 to 44 | Secondary infertility | High-middle SDI | 1142.473 | 1105.415 | 1180.773 |
| 45 to 49 | Secondary infertility | High-middle SDI | 351.4051 | 333.4301 | 370.3491 |
| 15 to 19 | Secondary infertility | High SDI | 111.3503 | 105.4768 | 117.5509 |
| 20 to 24 | Secondary infertility | High SDI | 273.5558 | 263.3501 | 284.1569 |
| 25 to 29 | Secondary infertility | High SDI | 408.9548 | 396.06 | 422.2696 |
| 30 to 34 | Secondary infertility | High SDI | 568.6401 | 552.3508 | 585.4099 |
| 35 to 39 | Secondary infertility | High SDI | 670.0201 | 651.0598 | 689.5327 |
| 40 to 44 | Secondary infertility | High SDI | 696.1954 | 675.7016 | 717.3108 |
| 45 to 49 | Secondary infertility | High SDI | 301.996 | 288.9364 | 315.6459 |
| 15 to 19 | Secondary infertility | Middle SDI | 127.6304 | 121.8786 | 133.6535 |
| 20 to 24 | Secondary infertility | Middle SDI | 330.1842 | 319.3379 | 341.3989 |
| 25 to 29 | Secondary infertility | Middle SDI | 451.9863 | 438.7895 | 465.5801 |
| 30 to 34 | Secondary infertility | Middle SDI | 588.5471 | 572.4292 | 605.1187 |
| 35 to 39 | Secondary infertility | Middle SDI | 680.5926 | 661.9734 | 699.7355 |
| 40 to 44 | Secondary infertility | Middle SDI | 708.3957 | 687.8717 | 729.532 |
| 45 to 49 | Secondary infertility | Middle SDI | 282.8527 | 269.8656 | 296.4647 |
| 15 to 19 | Secondary infertility | Low-middle SDI | 80.44305 | 74.83705 | 86.469 |
| 20 to 24 | Secondary infertility | Low-middle SDI | 175.099 | 165.4784 | 185.2789 |
| 25 to 29 | Secondary infertility | Low-middle SDI | 256.8863 | 244.2514 | 270.1749 |
| 30 to 34 | Secondary infertility | Low-middle SDI | 337.8281 | 322.0973 | 354.3272 |
| 35 to 39 | Secondary infertility | Low-middle SDI | 392.881 | 374.467 | 412.2005 |
| 40 to 44 | Secondary infertility | Low-middle SDI | 410.521 | 389.8727 | 432.2628 |
| 45 to 49 | Secondary infertility | Low-middle SDI | 146.0153 | 133.4696 | 159.7402 |
| 15 to 19 | Secondary infertility | Low SDI | 79.87428 | 75.9063 | 84.04968 |
| 20 to 24 | Secondary infertility | Low SDI | 130.5732 | 125.0188 | 136.3745 |
| 25 to 29 | Secondary infertility | Low SDI | 177.2297 | 170.29 | 184.4523 |
| 30 to 34 | Secondary infertility | Low SDI | 219.8042 | 211.4612 | 228.4763 |
| 35 to 39 | Secondary infertility | Low SDI | 248.1504 | 238.4621 | 258.2324 |
| 40 to 44 | Secondary infertility | Low SDI | 259.9635 | 248.9433 | 271.4715 |
| 45 to 49 | Secondary infertility | Low SDI | 76.9806 | 70.85207 | 83.63923 |
|  |  |  |  |  |  |

| **eTable 5.**The results of period effect. | | |  |  |  |
| --- | --- | --- | --- | --- | --- |
| Period | Type | location | Rate Ratio | CI Lo | CI Hi |
| 1992 to 1996 | Infertility | Global | 1 | 1 | 1 |
| 1997 to 2001 | Infertility | Global | 1.069082 | 1.052091 | 1.086347 |
| 2002 to 2006 | Infertility | Global | 1.126432 | 1.108727 | 1.14442 |
| 2007 to 2011 | Infertility | Global | 1.161607 | 1.143666 | 1.179829 |
| 2012 to 2016 | Infertility | Global | 1.213594 | 1.195282 | 1.232188 |
| 2017 to 2021 | Infertility | Global | 1.281185 | 1.262324 | 1.300328 |
| 1992 to 1996 | Infertility | High SDI | 1 | 1 | 1 |
| 1997 to 2001 | Infertility | High SDI | 1.041398 | 1.010728 | 1.073 |
| 2002 to 2006 | Infertility | High SDI | 1.028224 | 0.996738 | 1.060704 |
| 2007 to 2011 | Infertility | High SDI | 0.987299 | 0.956213 | 1.019395 |
| 2012 to 2016 | Infertility | High SDI | 1.016606 | 0.984534 | 1.049724 |
| 2017 to 2021 | Infertility | High SDI | 1.136035 | 1.101841 | 1.171292 |
| 1992 to 1996 | Infertility | High-middle SDI | 1 | 1 | 1 |
| 1997 to 2001 | Infertility | High-middle SDI | 1.132538 | 1.089159 | 1.177645 |
| 2002 to 2006 | Infertility | High-middle SDI | 1.2588 | 1.211062 | 1.308421 |
| 2007 to 2011 | Infertility | High-middle SDI | 1.319065 | 1.2694 | 1.370674 |
| 2012 to 2016 | Infertility | High-middle SDI | 1.366611 | 1.315622 | 1.419576 |
| 2017 to 2021 | Infertility | High-middle SDI | 1.436175 | 1.383789 | 1.490545 |
| 1992 to 1996 | Infertility | Middle SDI | 1 | 1 | 1 |
| 1997 to 2001 | Infertility | Middle SDI | 1.108484 | 1.078254 | 1.139562 |
| 2002 to 2006 | Infertility | Middle SDI | 1.225504 | 1.192942 | 1.258954 |
| 2007 to 2011 | Infertility | Middle SDI | 1.325623 | 1.291185 | 1.360979 |
| 2012 to 2016 | Infertility | Middle SDI | 1.438516 | 1.401678 | 1.476323 |
| 2017 to 2021 | Infertility | Middle SDI | 1.547695 | 1.508135 | 1.588292 |
| 1992 to 1996 | Infertility | Low-middle SDI | 1 | 1 | 1 |
| 1997 to 2001 | Infertility | Low-middle SDI | 1.058792 | 1.035174 | 1.082948 |
| 2002 to 2006 | Infertility | Low-middle SDI | 1.141682 | 1.116979 | 1.166931 |
| 2007 to 2011 | Infertility | Low-middle SDI | 1.247305 | 1.221174 | 1.273995 |
| 2012 to 2016 | Infertility | Low-middle SDI | 1.358645 | 1.330751 | 1.387124 |
| 2017 to 2021 | Infertility | Low-middle SDI | 1.463786 | 1.433499 | 1.494713 |
| 1992 to 1996 | Infertility | Low SDI | 1 | 1 | 1 |
| 1997 to 2001 | Infertility | Low SDI | 1.051586 | 1.031805 | 1.071745 |
| 2002 to 2006 | Infertility | Low SDI | 1.115271 | 1.095008 | 1.135908 |
| 2007 to 2011 | Infertility | Low SDI | 1.179623 | 1.158814 | 1.200806 |
| 2012 to 2016 | Infertility | Low SDI | 1.241102 | 1.219412 | 1.263178 |
| 2017 to 2021 | Infertility | Low SDI | 1.326278 | 1.302432 | 1.35056 |
| 1992 to 1996 | Primary infertility | Global | 1 | 1 | 1 |
| 1997 to 2001 | Primary infertility | Global | 1.036243 | 0.98726 | 1.087658 |
| 2002 to 2006 | Primary infertility | Global | 1.069224 | 1.018515 | 1.122457 |
| 2007 to 2011 | Primary infertility | Global | 1.069986 | 1.019129 | 1.123382 |
| 2012 to 2016 | Primary infertility | Global | 1.063779 | 1.012474 | 1.117684 |
| 2017 to 2021 | Primary infertility | Global | 1.128524 | 1.071705 | 1.188354 |
| 1992 to 1996 | Primary infertility | High SDI | 1 | 1 | 1 |
| 1997 to 2001 | Primary infertility | High SDI | 1.014177 | 0.974492 | 1.055478 |
| 2002 to 2006 | Primary infertility | High SDI | 0.974476 | 0.934489 | 1.016174 |
| 2007 to 2011 | Primary infertility | High SDI | 0.911962 | 0.873389 | 0.952238 |
| 2012 to 2016 | Primary infertility | High SDI | 0.925576 | 0.886055 | 0.96686 |
| 2017 to 2021 | Primary infertility | High SDI | 1.015133 | 0.971904 | 1.060286 |
| 1992 to 1996 | Primary infertility | High-middle SDI | 1 | 1 | 1 |
| 1997 to 2001 | Primary infertility | High-middle SDI | 1.105525 | 1.029516 | 1.187146 |
| 2002 to 2006 | Primary infertility | High-middle SDI | 1.230375 | 1.145951 | 1.321019 |
| 2007 to 2011 | Primary infertility | High-middle SDI | 1.238493 | 1.152742 | 1.330622 |
| 2012 to 2016 | Primary infertility | High-middle SDI | 1.201406 | 1.116338 | 1.292956 |
| 2017 to 2021 | Primary infertility | High-middle SDI | 1.223611 | 1.132918 | 1.321564 |
| 1992 to 1996 | Primary infertility | Middle SDI | 1 | 1 | 1 |
| 1997 to 2001 | Primary infertility | Middle SDI | 1.088082 | 1.048338 | 1.129332 |
| 2002 to 2006 | Primary infertility | Middle SDI | 1.181803 | 1.138894 | 1.226328 |
| 2007 to 2011 | Primary infertility | Middle SDI | 1.272901 | 1.226729 | 1.320811 |
| 2012 to 2016 | Primary infertility | Middle SDI | 1.360511 | 1.309962 | 1.41301 |
| 2017 to 2021 | Primary infertility | Middle SDI | 1.492437 | 1.433307 | 1.554007 |
| 1992 to 1996 | Primary infertility | Low-middle SDI | 1 | 1 | 1 |
| 1997 to 2001 | Primary infertility | Low-middle SDI | 1.053262 | 0.999497 | 1.10992 |
| 2002 to 2006 | Primary infertility | Low-middle SDI | 1.151321 | 1.093204 | 1.212528 |
| 2007 to 2011 | Primary infertility | Low-middle SDI | 1.212039 | 1.150738 | 1.276605 |
| 2012 to 2016 | Primary infertility | Low-middle SDI | 1.177119 | 1.115456 | 1.24219 |
| 2017 to 2021 | Primary infertility | Low-middle SDI | 1.304802 | 1.231713 | 1.382228 |
| 1992 to 1996 | Primary infertility | Low SDI | 1 | 1 | 1 |
| 1997 to 2001 | Primary infertility | Low SDI | 1.062126 | 0.989319 | 1.140291 |
| 2002 to 2006 | Primary infertility | Low SDI | 1.136323 | 1.057931 | 1.220525 |
| 2007 to 2011 | Primary infertility | Low SDI | 1.161925 | 1.078962 | 1.251266 |
| 2012 to 2016 | Primary infertility | Low SDI | 1.151683 | 1.063664 | 1.246986 |
| 2017 to 2021 | Primary infertility | Low SDI | 1.285447 | 1.176497 | 1.404486 |
| 1992 to 1996 | Secondary infertility | Global | 1 | 1 | 1 |
| 1997 to 2001 | Secondary infertility | Global | 1.095266 | 1.063799 | 1.127664 |
| 2002 to 2006 | Secondary infertility | Global | 1.173133 | 1.139593 | 1.207661 |
| 2007 to 2011 | Secondary infertility | Global | 1.229623 | 1.195019 | 1.265228 |
| 2012 to 2016 | Secondary infertility | Global | 1.307736 | 1.27208 | 1.344391 |
| 2017 to 2021 | Secondary infertility | Global | 1.367851 | 1.332168 | 1.40449 |
| 1992 to 1996 | Secondary infertility | High SDI | 1 | 1 | 1 |
| 1997 to 2001 | Secondary infertility | High SDI | 1.068929 | 1.028195 | 1.111277 |
| 2002 to 2006 | Secondary infertility | High SDI | 1.072376 | 1.029222 | 1.11734 |
| 2007 to 2011 | Secondary infertility | High SDI | 1.035924 | 0.992567 | 1.081174 |
| 2012 to 2016 | Secondary infertility | High SDI | 1.060481 | 1.015689 | 1.107249 |
| 2017 to 2021 | Secondary infertility | High SDI | 1.180704 | 1.132935 | 1.230487 |
| 1992 to 1996 | Secondary infertility | High-middle SDI | 1 | 1 | 1 |
| 1997 to 2001 | Secondary infertility | High-middle SDI | 1.148133 | 1.107256 | 1.190518 |
| 2002 to 2006 | Secondary infertility | High-middle SDI | 1.276835 | 1.231438 | 1.323906 |
| 2007 to 2011 | Secondary infertility | High-middle SDI | 1.354948 | 1.306923 | 1.404737 |
| 2012 to 2016 | Secondary infertility | High-middle SDI | 1.425052 | 1.375134 | 1.476781 |
| 2017 to 2021 | Secondary infertility | High-middle SDI | 1.498271 | 1.447524 | 1.550797 |
| 1992 to 1996 | Secondary infertility | Middle SDI | 1 | 1 | 1 |
| 1997 to 2001 | Secondary infertility | Middle SDI | 1.119233 | 1.079405 | 1.160531 |
| 2002 to 2006 | Secondary infertility | Middle SDI | 1.25199 | 1.208453 | 1.297095 |
| 2007 to 2011 | Secondary infertility | Middle SDI | 1.365903 | 1.319424 | 1.41402 |
| 2012 to 2016 | Secondary infertility | Middle SDI | 1.497114 | 1.447322 | 1.548619 |
| 2017 to 2021 | Secondary infertility | Middle SDI | 1.597233 | 1.545285 | 1.650928 |
| 1992 to 1996 | Secondary infertility | Low-middle SDI | 1 | 1 | 1 |
| 1997 to 2001 | Secondary infertility | Low-middle SDI | 1.085542 | 1.017556 | 1.158071 |
| 2002 to 2006 | Secondary infertility | Low-middle SDI | 1.185348 | 1.11306 | 1.262332 |
| 2007 to 2011 | Secondary infertility | Low-middle SDI | 1.33643 | 1.257994 | 1.419755 |
| 2012 to 2016 | Secondary infertility | Low-middle SDI | 1.53561 | 1.449224 | 1.627146 |
| 2017 to 2021 | Secondary infertility | Low-middle SDI | 1.606829 | 1.51822 | 1.70061 |
| 1992 to 1996 | Secondary infertility | Low SDI | 1 | 1 | 1 |
| 1997 to 2001 | Secondary infertility | Low SDI | 1.064959 | 1.010694 | 1.122137 |
| 2002 to 2006 | Secondary infertility | Low SDI | 1.147743 | 1.091319 | 1.207085 |
| 2007 to 2011 | Secondary infertility | Low SDI | 1.245809 | 1.187017 | 1.307513 |
| 2012 to 2016 | Secondary infertility | Low SDI | 1.340941 | 1.279634 | 1.405184 |
| 2017 to 2021 | Secondary infertility | Low SDI | 1.395152 | 1.331363 | 1.461998 |
|  |  |  |  |  |  |

| **eTable 6**.The results of cohort effect. | | |  |  |  |
| --- | --- | --- | --- | --- | --- |
| Cohort | Type | location | Rate Ratio | CILo | CIHi |
| 1942 to 1951 | Infertility | Global | 0.808488 | 0.760725 | 0.859251 |
| 1947 to 1956 | Infertility | Global | 0.83055 | 0.806276 | 0.855554 |
| 1952 to 1961 | Infertility | Global | 0.844926 | 0.826553 | 0.863708 |
| 1957 to 1966 | Infertility | Global | 0.876634 | 0.860868 | 0.892688 |
| 1962 to 1971 | Infertility | Global | 0.906215 | 0.891907 | 0.920752 |
| 1967 to 1976 | Infertility | Global | 0.95396 | 0.940116 | 0.968008 |
| 1972 to 1981 | Infertility | Global | 1 | 1 | 1 |
| 1977 to 1986 | Infertility | Global | 1.052042 | 1.036459 | 1.06786 |
| 1982 to 1991 | Infertility | Global | 1.111566 | 1.093899 | 1.129518 |
| 1987 to 1996 | Infertility | Global | 1.186669 | 1.165012 | 1.208728 |
| 1992 to 2001 | Infertility | Global | 1.251477 | 1.222432 | 1.281213 |
| 1997 to 2006 | Infertility | Global | 1.346149 | 1.29456 | 1.399794 |
| 1942 to 1951 | Infertility | High SDI | 0.964101 | 0.868984 | 1.06963 |
| 1947 to 1956 | Infertility | High SDI | 0.95279 | 0.905041 | 1.003059 |
| 1952 to 1961 | Infertility | High SDI | 0.922008 | 0.886504 | 0.958934 |
| 1957 to 1966 | Infertility | High SDI | 0.941245 | 0.910005 | 0.973557 |
| 1962 to 1971 | Infertility | High SDI | 0.972786 | 0.94308 | 1.003427 |
| 1967 to 1976 | Infertility | High SDI | 1.006297 | 0.977276 | 1.036181 |
| 1972 to 1981 | Infertility | High SDI | 1 | 1 | 1 |
| 1977 to 1986 | Infertility | High SDI | 1.000131 | 0.969096 | 1.032159 |
| 1982 to 1991 | Infertility | High SDI | 1.024051 | 0.988704 | 1.060661 |
| 1987 to 1996 | Infertility | High SDI | 1.060867 | 1.0177 | 1.105864 |
| 1992 to 2001 | Infertility | High SDI | 1.102269 | 1.041168 | 1.166956 |
| 1997 to 2006 | Infertility | High SDI | 1.063402 | 0.915288 | 1.235486 |
| 1942 to 1951 | Infertility | High-middle SDI | 0.734399 | 0.640948 | 0.841475 |
| 1947 to 1956 | Infertility | High-middle SDI | 0.728993 | 0.680294 | 0.781177 |
| 1952 to 1961 | Infertility | High-middle SDI | 0.74568 | 0.707902 | 0.785474 |
| 1957 to 1966 | Infertility | High-middle SDI | 0.808129 | 0.774033 | 0.843728 |
| 1962 to 1971 | Infertility | High-middle SDI | 0.870626 | 0.838234 | 0.90427 |
| 1967 to 1976 | Infertility | High-middle SDI | 0.929833 | 0.897532 | 0.963296 |
| 1972 to 1981 | Infertility | High-middle SDI | 1 | 1 | 1 |
| 1977 to 1986 | Infertility | High-middle SDI | 1.051512 | 1.013018 | 1.091469 |
| 1982 to 1991 | Infertility | High-middle SDI | 1.124749 | 1.08046 | 1.170852 |
| 1987 to 1996 | Infertility | High-middle SDI | 1.278867 | 1.218914 | 1.341768 |
| 1992 to 2001 | Infertility | High-middle SDI | 1.418927 | 1.329412 | 1.51447 |
| 1997 to 2006 | Infertility | High-middle SDI | 1.385334 | 1.229404 | 1.561041 |
| 1942 to 1951 | Infertility | Middle SDI | 0.601389 | 0.536331 | 0.674339 |
| 1947 to 1956 | Infertility | Middle SDI | 0.646175 | 0.611719 | 0.682572 |
| 1952 to 1961 | Infertility | Middle SDI | 0.700824 | 0.673674 | 0.729069 |
| 1957 to 1966 | Infertility | Middle SDI | 0.753886 | 0.730496 | 0.778025 |
| 1962 to 1971 | Infertility | Middle SDI | 0.805492 | 0.784242 | 0.827318 |
| 1967 to 1976 | Infertility | Middle SDI | 0.891292 | 0.869961 | 0.913146 |
| 1972 to 1981 | Infertility | Middle SDI | 1 | 1 | 1 |
| 1977 to 1986 | Infertility | Middle SDI | 1.099895 | 1.073425 | 1.127017 |
| 1982 to 1991 | Infertility | Middle SDI | 1.178982 | 1.148842 | 1.209911 |
| 1987 to 1996 | Infertility | Middle SDI | 1.285752 | 1.248067 | 1.324575 |
| 1992 to 2001 | Infertility | Middle SDI | 1.388581 | 1.336863 | 1.442299 |
| 1997 to 2006 | Infertility | Middle SDI | 1.454431 | 1.365233 | 1.549458 |
| 1942 to 1951 | Infertility | Low-middle SDI | 0.650491 | 0.589052 | 0.718337 |
| 1947 to 1956 | Infertility | Low-middle SDI | 0.691599 | 0.65992 | 0.724799 |
| 1952 to 1961 | Infertility | Low-middle SDI | 0.739596 | 0.715366 | 0.764646 |
| 1957 to 1966 | Infertility | Low-middle SDI | 0.788438 | 0.767799 | 0.809632 |
| 1962 to 1971 | Infertility | Low-middle SDI | 0.843222 | 0.824442 | 0.86243 |
| 1967 to 1976 | Infertility | Low-middle SDI | 0.908639 | 0.890709 | 0.92693 |
| 1972 to 1981 | Infertility | Low-middle SDI | 1 | 1 | 1 |
| 1977 to 1986 | Infertility | Low-middle SDI | 1.088031 | 1.067492 | 1.108965 |
| 1982 to 1991 | Infertility | Low-middle SDI | 1.176341 | 1.152872 | 1.200289 |
| 1987 to 1996 | Infertility | Low-middle SDI | 1.264655 | 1.23675 | 1.29319 |
| 1992 to 2001 | Infertility | Low-middle SDI | 1.360159 | 1.324219 | 1.397074 |
| 1997 to 2006 | Infertility | Low-middle SDI | 1.567107 | 1.50709 | 1.629514 |
| 1942 to 1951 | Infertility | Low SDI | 0.787268 | 0.716516 | 0.865007 |
| 1947 to 1956 | Infertility | Low SDI | 0.773531 | 0.741563 | 0.806877 |
| 1952 to 1961 | Infertility | Low SDI | 0.80683 | 0.783298 | 0.831069 |
| 1957 to 1966 | Infertility | Low SDI | 0.834629 | 0.815359 | 0.854354 |
| 1962 to 1971 | Infertility | Low SDI | 0.881562 | 0.864528 | 0.898931 |
| 1967 to 1976 | Infertility | Low SDI | 0.9376 | 0.921846 | 0.953624 |
| 1972 to 1981 | Infertility | Low SDI | 1 | 1 | 1 |
| 1977 to 1986 | Infertility | Low SDI | 1.061173 | 1.044624 | 1.077985 |
| 1982 to 1991 | Infertility | Low SDI | 1.130702 | 1.112318 | 1.14939 |
| 1987 to 1996 | Infertility | Low SDI | 1.204964 | 1.18375 | 1.226559 |
| 1992 to 2001 | Infertility | Low SDI | 1.275247 | 1.249259 | 1.301776 |
| 1997 to 2006 | Infertility | Low SDI | 1.353227 | 1.315853 | 1.391663 |
| 1942 to 1951 | Primary infertility | Global | 0.885014 | 0.685181 | 1.143128 |
| 1947 to 1956 | Primary infertility | Global | 0.915984 | 0.81 | 1.035835 |
| 1952 to 1961 | Primary infertility | Global | 0.94523 | 0.864848 | 1.033082 |
| 1957 to 1966 | Primary infertility | Global | 0.968345 | 0.904238 | 1.036998 |
| 1962 to 1971 | Primary infertility | Global | 0.955984 | 0.904567 | 1.010324 |
| 1967 to 1976 | Primary infertility | Global | 0.974833 | 0.92935 | 1.022542 |
| 1972 to 1981 | Primary infertility | Global | 1 | 1 | 1 |
| 1977 to 1986 | Primary infertility | Global | 1.024019 | 0.977433 | 1.072825 |
| 1982 to 1991 | Primary infertility | Global | 1.040479 | 0.991747 | 1.091605 |
| 1987 to 1996 | Primary infertility | Global | 1.092349 | 1.037824 | 1.149739 |
| 1992 to 2001 | Primary infertility | Global | 1.101638 | 1.035442 | 1.172066 |
| 1997 to 2006 | Primary infertility | Global | 1.098045 | 0.991337 | 1.216239 |
| 1942 to 1951 | Primary infertility | High SDI | 1.117989 | 0.914306 | 1.367047 |
| 1947 to 1956 | Primary infertility | High SDI | 1.171845 | 1.066746 | 1.287299 |
| 1952 to 1961 | Primary infertility | High SDI | 1.103212 | 1.029548 | 1.182145 |
| 1957 to 1966 | Primary infertility | High SDI | 1.082731 | 1.025185 | 1.143507 |
| 1962 to 1971 | Primary infertility | High SDI | 1.057319 | 1.009831 | 1.107039 |
| 1967 to 1976 | Primary infertility | High SDI | 1.035137 | 0.993331 | 1.078702 |
| 1972 to 1981 | Primary infertility | High SDI | 1 | 1 | 1 |
| 1977 to 1986 | Primary infertility | High SDI | 0.986929 | 0.945547 | 1.030122 |
| 1982 to 1991 | Primary infertility | High SDI | 1.007439 | 0.963062 | 1.053861 |
| 1987 to 1996 | Primary infertility | High SDI | 1.065714 | 1.014949 | 1.119017 |
| 1992 to 2001 | Primary infertility | High SDI | 1.118102 | 1.049469 | 1.191224 |
| 1997 to 2006 | Primary infertility | High SDI | 1.102535 | 0.932877 | 1.303047 |
| 1942 to 1951 | Primary infertility | High-middle SDI | 0.955724 | 0.668982 | 1.36537 |
| 1947 to 1956 | Primary infertility | High-middle SDI | 0.895408 | 0.75177 | 1.066491 |
| 1952 to 1961 | Primary infertility | High-middle SDI | 0.912975 | 0.803903 | 1.036845 |
| 1957 to 1966 | Primary infertility | High-middle SDI | 0.954872 | 0.865208 | 1.053827 |
| 1962 to 1971 | Primary infertility | High-middle SDI | 0.923369 | 0.852122 | 1.000573 |
| 1967 to 1976 | Primary infertility | High-middle SDI | 0.933207 | 0.86969 | 1.001362 |
| 1972 to 1981 | Primary infertility | High-middle SDI | 1 | 1 | 1 |
| 1977 to 1986 | Primary infertility | High-middle SDI | 1.022265 | 0.953506 | 1.095982 |
| 1982 to 1991 | Primary infertility | High-middle SDI | 1.047685 | 0.975027 | 1.125756 |
| 1987 to 1996 | Primary infertility | High-middle SDI | 1.223376 | 1.131768 | 1.3224 |
| 1992 to 2001 | Primary infertility | High-middle SDI | 1.374009 | 1.245488 | 1.515792 |
| 1997 to 2006 | Primary infertility | High-middle SDI | 1.29611 | 1.084391 | 1.549165 |
| 1942 to 1951 | Primary infertility | Middle SDI | 0.596824 | 0.487922 | 0.730032 |
| 1947 to 1956 | Primary infertility | Middle SDI | 0.611399 | 0.552629 | 0.676418 |
| 1952 to 1961 | Primary infertility | Middle SDI | 0.694714 | 0.646404 | 0.746635 |
| 1957 to 1966 | Primary infertility | Middle SDI | 0.745341 | 0.705894 | 0.786992 |
| 1962 to 1971 | Primary infertility | Middle SDI | 0.781097 | 0.74878 | 0.81481 |
| 1967 to 1976 | Primary infertility | Middle SDI | 0.874728 | 0.844262 | 0.906295 |
| 1972 to 1981 | Primary infertility | Middle SDI | 1 | 1 | 1 |
| 1977 to 1986 | Primary infertility | Middle SDI | 1.100173 | 1.063855 | 1.137732 |
| 1982 to 1991 | Primary infertility | Middle SDI | 1.12893 | 1.090807 | 1.168385 |
| 1987 to 1996 | Primary infertility | Middle SDI | 1.181763 | 1.139129 | 1.225993 |
| 1992 to 2001 | Primary infertility | Middle SDI | 1.215545 | 1.163019 | 1.270444 |
| 1997 to 2006 | Primary infertility | Middle SDI | 1.215437 | 1.131923 | 1.305112 |
| 1942 to 1951 | Primary infertility | Low-middle SDI | 0.662768 | 0.493242 | 0.890561 |
| 1947 to 1956 | Primary infertility | Low-middle SDI | 0.67295 | 0.580155 | 0.780589 |
| 1952 to 1961 | Primary infertility | Low-middle SDI | 0.748155 | 0.674314 | 0.830083 |
| 1957 to 1966 | Primary infertility | Low-middle SDI | 0.826554 | 0.764707 | 0.893402 |
| 1962 to 1971 | Primary infertility | Low-middle SDI | 0.905059 | 0.851755 | 0.961698 |
| 1967 to 1976 | Primary infertility | Low-middle SDI | 0.962186 | 0.915 | 1.011807 |
| 1972 to 1981 | Primary infertility | Low-middle SDI | 1 | 1 | 1 |
| 1977 to 1986 | Primary infertility | Low-middle SDI | 1.012767 | 0.966404 | 1.061354 |
| 1982 to 1991 | Primary infertility | Low-middle SDI | 1.047189 | 0.998065 | 1.098729 |
| 1987 to 1996 | Primary infertility | Low-middle SDI | 1.086438 | 1.033381 | 1.14222 |
| 1992 to 2001 | Primary infertility | Low-middle SDI | 1.071956 | 1.012197 | 1.135243 |
| 1997 to 2006 | Primary infertility | Low-middle SDI | 1.103488 | 1.015938 | 1.198584 |
| 1942 to 1951 | Primary infertility | Low SDI | 0.632229 | 0.372736 | 1.072377 |
| 1947 to 1956 | Primary infertility | Low SDI | 0.681579 | 0.535269 | 0.86788 |
| 1952 to 1961 | Primary infertility | Low SDI | 0.719106 | 0.609742 | 0.848086 |
| 1957 to 1966 | Primary infertility | Low SDI | 0.79411 | 0.705851 | 0.893406 |
| 1962 to 1971 | Primary infertility | Low SDI | 0.91852 | 0.842488 | 1.001413 |
| 1967 to 1976 | Primary infertility | Low SDI | 0.98307 | 0.917579 | 1.053236 |
| 1972 to 1981 | Primary infertility | Low SDI | 1 | 1 | 1 |
| 1977 to 1986 | Primary infertility | Low SDI | 0.988322 | 0.929217 | 1.051187 |
| 1982 to 1991 | Primary infertility | Low SDI | 0.985559 | 0.925552 | 1.049456 |
| 1987 to 1996 | Primary infertility | Low SDI | 1.017566 | 0.954147 | 1.0852 |
| 1992 to 2001 | Primary infertility | Low SDI | 1.029316 | 0.959004 | 1.104783 |
| 1997 to 2006 | Primary infertility | Low SDI | 0.997101 | 0.906344 | 1.096947 |
| 1942 to 1951 | Secondary infertility | Global | 0.799257 | 0.723654 | 0.882759 |
| 1947 to 1956 | Secondary infertility | Global | 0.818125 | 0.779304 | 0.858879 |
| 1952 to 1961 | Secondary infertility | Global | 0.827413 | 0.797874 | 0.858045 |
| 1957 to 1966 | Secondary infertility | Global | 0.857551 | 0.831721 | 0.884183 |
| 1962 to 1971 | Secondary infertility | Global | 0.891947 | 0.867789 | 0.916777 |
| 1967 to 1976 | Secondary infertility | Global | 0.945306 | 0.921369 | 0.969865 |
| 1972 to 1981 | Secondary infertility | Global | 1 | 1 | 1 |
| 1977 to 1986 | Secondary infertility | Global | 1.067111 | 1.039001 | 1.09598 |
| 1982 to 1991 | Secondary infertility | Global | 1.161444 | 1.127742 | 1.196154 |
| 1987 to 1996 | Secondary infertility | Global | 1.273112 | 1.228714 | 1.319114 |
| 1992 to 2001 | Secondary infertility | Global | 1.406498 | 1.342 | 1.474096 |
| 1997 to 2006 | Secondary infertility | Global | 1.611413 | 1.490556 | 1.74207 |
| 1942 to 1951 | Secondary infertility | High SDI | 0.939813 | 0.835227 | 1.057495 |
| 1947 to 1956 | Secondary infertility | High SDI | 0.914038 | 0.861468 | 0.969816 |
| 1952 to 1961 | Secondary infertility | High SDI | 0.882215 | 0.842623 | 0.923667 |
| 1957 to 1966 | Secondary infertility | High SDI | 0.899554 | 0.86375 | 0.936842 |
| 1962 to 1971 | Secondary infertility | High SDI | 0.936289 | 0.900897 | 0.973072 |
| 1967 to 1976 | Secondary infertility | High SDI | 0.989146 | 0.953361 | 1.026275 |
| 1972 to 1981 | Secondary infertility | High SDI | 1 | 1 | 1 |
| 1977 to 1986 | Secondary infertility | High SDI | 1.013905 | 0.973833 | 1.055627 |
| 1982 to 1991 | Secondary infertility | High SDI | 1.050767 | 1.00242 | 1.101446 |
| 1987 to 1996 | Secondary infertility | High SDI | 1.071723 | 1.008765 | 1.138609 |
| 1992 to 2001 | Secondary infertility | High SDI | 1.094699 | 1.001951 | 1.196031 |
| 1997 to 2006 | Secondary infertility | High SDI | 1.040309 | 0.833332 | 1.298694 |
| 1942 to 1951 | Secondary infertility | High-middle SDI | 0.709079 | 0.632108 | 0.795422 |
| 1947 to 1956 | Secondary infertility | High-middle SDI | 0.7075 | 0.66711 | 0.750336 |
| 1952 to 1961 | Secondary infertility | High-middle SDI | 0.722867 | 0.691327 | 0.755846 |
| 1957 to 1966 | Secondary infertility | High-middle SDI | 0.785997 | 0.757003 | 0.816101 |
| 1962 to 1971 | Secondary infertility | High-middle SDI | 0.861093 | 0.832605 | 0.890556 |
| 1967 to 1976 | Secondary infertility | High-middle SDI | 0.930138 | 0.901054 | 0.960161 |
| 1972 to 1981 | Secondary infertility | High-middle SDI | 1 | 1 | 1 |
| 1977 to 1986 | Secondary infertility | High-middle SDI | 1.060884 | 1.025137 | 1.097878 |
| 1982 to 1991 | Secondary infertility | High-middle SDI | 1.165334 | 1.122053 | 1.210285 |
| 1987 to 1996 | Secondary infertility | High-middle SDI | 1.323586 | 1.261889 | 1.388299 |
| 1992 to 2001 | Secondary infertility | High-middle SDI | 1.466268 | 1.369842 | 1.569482 |
| 1997 to 2006 | Secondary infertility | High-middle SDI | 1.473228 | 1.301948 | 1.66704 |
| 1942 to 1951 | Secondary infertility | Middle SDI | 0.604835 | 0.527058 | 0.69409 |
| 1947 to 1956 | Secondary infertility | Middle SDI | 0.655594 | 0.614105 | 0.699886 |
| 1952 to 1961 | Secondary infertility | Middle SDI | 0.704372 | 0.671787 | 0.738537 |
| 1957 to 1966 | Secondary infertility | Middle SDI | 0.757533 | 0.729062 | 0.787116 |
| 1962 to 1971 | Secondary infertility | Middle SDI | 0.812473 | 0.785952 | 0.839889 |
| 1967 to 1976 | Secondary infertility | Middle SDI | 0.896205 | 0.869144 | 0.924109 |
| 1972 to 1981 | Secondary infertility | Middle SDI | 1 | 1 | 1 |
| 1977 to 1986 | Secondary infertility | Middle SDI | 1.100634 | 1.066451 | 1.135913 |
| 1982 to 1991 | Secondary infertility | Middle SDI | 1.207063 | 1.166332 | 1.249217 |
| 1987 to 1996 | Secondary infertility | Middle SDI | 1.35822 | 1.30364 | 1.415086 |
| 1992 to 2001 | Secondary infertility | Middle SDI | 1.532753 | 1.451814 | 1.618204 |
| 1997 to 2006 | Secondary infertility | Middle SDI | 1.673396 | 1.525952 | 1.835087 |
| 1942 to 1951 | Secondary infertility | Low-middle SDI | 0.654283 | 0.507366 | 0.843741 |
| 1947 to 1956 | Secondary infertility | Low-middle SDI | 0.700787 | 0.622506 | 0.788911 |
| 1952 to 1961 | Secondary infertility | Low-middle SDI | 0.741367 | 0.6812 | 0.806847 |
| 1957 to 1966 | Secondary infertility | Low-middle SDI | 0.783997 | 0.731937 | 0.839761 |
| 1962 to 1971 | Secondary infertility | Low-middle SDI | 0.829619 | 0.7813 | 0.880927 |
| 1967 to 1976 | Secondary infertility | Low-middle SDI | 0.889785 | 0.842649 | 0.939558 |
| 1972 to 1981 | Secondary infertility | Low-middle SDI | 1 | 1 | 1 |
| 1977 to 1986 | Secondary infertility | Low-middle SDI | 1.125833 | 1.067906 | 1.186902 |
| 1982 to 1991 | Secondary infertility | Low-middle SDI | 1.264379 | 1.193961 | 1.338952 |
| 1987 to 1996 | Secondary infertility | Low-middle SDI | 1.442643 | 1.350357 | 1.541236 |
| 1992 to 2001 | Secondary infertility | Low-middle SDI | 1.728714 | 1.592803 | 1.876223 |
| 1997 to 2006 | Secondary infertility | Low-middle SDI | 2.243775 | 1.988616 | 2.531672 |
| 1942 to 1951 | Secondary infertility | Low SDI | 0.825702 | 0.656788 | 1.038057 |
| 1947 to 1956 | Secondary infertility | Low SDI | 0.794964 | 0.717553 | 0.880726 |
| 1952 to 1961 | Secondary infertility | Low SDI | 0.828104 | 0.770308 | 0.890236 |
| 1957 to 1966 | Secondary infertility | Low SDI | 0.849332 | 0.801239 | 0.900312 |
| 1962 to 1971 | Secondary infertility | Low SDI | 0.877461 | 0.834457 | 0.922682 |
| 1967 to 1976 | Secondary infertility | Low SDI | 0.923593 | 0.883168 | 0.965867 |
| 1972 to 1981 | Secondary infertility | Low SDI | 1 | 1 | 1 |
| 1977 to 1986 | Secondary infertility | Low SDI | 1.092932 | 1.047818 | 1.139989 |
| 1982 to 1991 | Secondary infertility | Low SDI | 1.213414 | 1.160358 | 1.268897 |
| 1987 to 1996 | Secondary infertility | Low SDI | 1.344894 | 1.279327 | 1.413822 |
| 1992 to 2001 | Secondary infertility | Low SDI | 1.498072 | 1.411262 | 1.590221 |
| 1997 to 2006 | Secondary infertility | Low SDI | 1.705836 | 1.572126 | 1.850917 |
|  |  |  |  |  |  |

| **eTable 7.** The results of local drift. | | |  |  |  | |
| --- | --- | --- | --- | --- | --- | --- |
| Age | Type | location | Mean Percent Change per Calendar Year | CILo | | CIHi |
| 15 to 19 | Infertility | Global | 1.191265491 | 1.06395 | 1.318741 | |
| 20 to 24 | Infertility | Global | 1.1065205 | 1.02409 | 1.189019 | |
| 25 to 29 | Infertility | Global | 1.067131496 | 0.996782 | 1.13753 | |
| 30 to 34 | Infertility | Global | 0.965747907 | 0.896675 | 1.034868 | |
| 35 to 39 | Infertility | Global | 0.885349087 | 0.809118 | 0.961638 | |
| 40 to 44 | Infertility | Global | 0.760387248 | 0.663639 | 0.857228 | |
| 45 to 49 | Infertility | Global | 0.645321662 | 0.459566 | 0.831421 | |
| 15 to 19 | Infertility | High SDI | 0.363177975 | -0.08848 | 0.816875 | |
| 20 to 24 | Infertility | High SDI | 0.375768605 | 0.185447 | 0.566452 | |
| 25 to 29 | Infertility | High SDI | 0.278091944 | 0.131326 | 0.425073 | |
| 30 to 34 | Infertility | High SDI | 0.285250357 | 0.151518 | 0.419161 | |
| 35 to 39 | Infertility | High SDI | 0.356165599 | 0.217777 | 0.494746 | |
| 40 to 44 | Infertility | High SDI | 0.30744214 | 0.138492 | 0.476678 | |
| 45 to 49 | Infertility | High SDI | 0.169937208 | -0.147 | 0.487877 | |
| 15 to 19 | Infertility | High-middle SDI | 1.529950043 | 1.150524 | 1.910799 | |
| 20 to 24 | Infertility | High-middle SDI | 1.681704649 | 1.456972 | 1.906935 | |
| 25 to 29 | Infertility | High-middle SDI | 1.464182589 | 1.2843 | 1.644385 | |
| 30 to 34 | Infertility | High-middle SDI | 1.318345045 | 1.148721 | 1.488254 | |
| 35 to 39 | Infertility | High-middle SDI | 1.394393167 | 1.210956 | 1.578163 | |
| 40 to 44 | Infertility | High-middle SDI | 1.332847045 | 1.105804 | 1.5604 | |
| 45 to 49 | Infertility | High-middle SDI | 1.029743978 | 0.612187 | 1.449034 | |
| 15 to 19 | Infertility | Middle SDI | 1.531013936 | 1.324862 | 1.737585 | |
| 20 to 24 | Infertility | Middle SDI | 1.752489355 | 1.617987 | 1.88717 | |
| 25 to 29 | Infertility | Middle SDI | 1.887678072 | 1.770867 | 2.004623 | |
| 30 to 34 | Infertility | Middle SDI | 1.895137972 | 1.776504 | 2.013911 | |
| 35 to 39 | Infertility | Middle SDI | 1.846745301 | 1.710387 | 1.983286 | |
| 40 to 44 | Infertility | Middle SDI | 1.712139303 | 1.533477 | 1.891116 | |
| 45 to 49 | Infertility | Middle SDI | 1.555565419 | 1.205204 | 1.907139 | |
| 15 to 19 | Infertility | Low-middle SDI | 1.722228438 | 1.589437 | 1.855194 | |
| 20 to 24 | Infertility | Low-middle SDI | 1.612568609 | 1.513837 | 1.711396 | |
| 25 to 29 | Infertility | Low-middle SDI | 1.662608408 | 1.570257 | 1.755044 | |
| 30 to 34 | Infertility | Low-middle SDI | 1.648320071 | 1.550948 | 1.745785 | |
| 35 to 39 | Infertility | Low-middle SDI | 1.565225206 | 1.451562 | 1.679015 | |
| 40 to 44 | Infertility | Low-middle SDI | 1.45531687 | 1.30303 | 1.607833 | |
| 45 to 49 | Infertility | Low-middle SDI | 1.340172049 | 1.036801 | 1.644454 | |
| 15 to 19 | Infertility | Low SDI | 1.223057478 | 1.12606 | 1.320148 | |
| 20 to 24 | Infertility | Low SDI | 1.242322569 | 1.164581 | 1.320123 | |
| 25 to 29 | Infertility | Low SDI | 1.255667641 | 1.179366 | 1.332026 | |
| 30 to 34 | Infertility | Low SDI | 1.22965398 | 1.146181 | 1.313196 | |
| 35 to 39 | Infertility | Low SDI | 1.134396548 | 1.03455 | 1.234341 | |
| 40 to 44 | Infertility | Low SDI | 1.027695115 | 0.891247 | 1.164327 | |
| 45 to 49 | Infertility | Low SDI | 0.74552825 | 0.460076 | 1.031792 | |
| 15 to 19 | Primary infertility | Global | 0.421168104 | 0.089447 | 0.753989 | |
| 20 to 24 | Primary infertility | Global | 0.511230097 | 0.298528 | 0.724383 | |
| 25 to 29 | Primary infertility | Global | 0.507551858 | 0.303834 | 0.711683 | |
| 30 to 34 | Primary infertility | Global | 0.338269734 | 0.098247 | 0.578868 | |
| 35 to 39 | Primary infertility | Global | 0.29548337 | -0.00577 | 0.597647 | |
| 40 to 44 | Primary infertility | Global | 0.296696049 | -0.10346 | 0.69845 | |
| 45 to 49 | Primary infertility | Global | 0.363918662 | -0.40942 | 1.14326 | |
| 15 to 19 | Primary infertility | High SDI | 0.526329657 | 0.019994 | 1.035228 | |
| 20 to 24 | Primary infertility | High SDI | 0.341723802 | 0.135438 | 0.548434 | |
| 25 to 29 | Primary infertility | High SDI | -0.03141281 | -0.2032 | 0.140668 | |
| 30 to 34 | Primary infertility | High SDI | -0.343175009 | -0.5357 | -0.15028 | |
| 35 to 39 | Primary infertility | High SDI | -0.465527587 | -0.70223 | -0.22827 | |
| 40 to 44 | Primary infertility | High SDI | -0.57418706 | -0.88226 | -0.26516 | |
| 45 to 49 | Primary infertility | High SDI | -0.406177838 | -1.00932 | 0.200636 | |
| 15 to 19 | Primary infertility | High-middle SDI | 1.345546082 | 0.77553 | 1.918786 | |
| 20 to 24 | Primary infertility | High-middle SDI | 1.47576216 | 1.140151 | 1.812487 | |
| 25 to 29 | Primary infertility | High-middle SDI | 1.019942143 | 0.711588 | 1.329241 | |
| 30 to 34 | Primary infertility | High-middle SDI | 0.480104877 | 0.124841 | 0.836629 | |
| 35 to 39 | Primary infertility | High-middle SDI | 0.409103477 | -0.02908 | 0.849209 | |
| 40 to 44 | Primary infertility | High-middle SDI | 0.334607339 | -0.23739 | 0.909879 | |
| 45 to 49 | Primary infertility | High-middle SDI | 0.010233276 | -1.06657 | 1.098754 | |
| 15 to 19 | Primary infertility | Middle SDI | 0.757385416 | 0.525225 | 0.990082 | |
| 20 to 24 | Primary infertility | Middle SDI | 1.24887616 | 1.094208 | 1.403781 | |
| 25 to 29 | Primary infertility | Middle SDI | 1.689029882 | 1.533969 | 1.844327 | |
| 30 to 34 | Primary infertility | Middle SDI | 1.867119232 | 1.677091 | 2.057502 | |
| 35 to 39 | Primary infertility | Middle SDI | 1.899861487 | 1.654938 | 2.145375 | |
| 40 to 44 | Primary infertility | Middle SDI | 1.844302598 | 1.513355 | 2.176329 | |
| 45 to 49 | Primary infertility | Middle SDI | 1.564483317 | 0.94674 | 2.186007 | |
| 15 to 19 | Primary infertility | Low-middle SDI | 0.400556665 | 0.124182 | 0.677694 | |
| 20 to 24 | Primary infertility | Low-middle SDI | 0.470989317 | 0.264178 | 0.678227 | |
| 25 to 29 | Primary infertility | Low-middle SDI | 0.676538443 | 0.456885 | 0.896672 | |
| 30 to 34 | Primary infertility | Low-middle SDI | 0.894761525 | 0.62437 | 1.165879 | |
| 35 to 39 | Primary infertility | Low-middle SDI | 1.234317383 | 0.884851 | 1.584995 | |
| 40 to 44 | Primary infertility | Low-middle SDI | 1.627934896 | 1.145758 | 2.11241 | |
| 45 to 49 | Primary infertility | Low-middle SDI | 1.643388119 | 0.737329 | 2.557597 | |
| 15 to 19 | Primary infertility | Low SDI | 0.079670633 | -0.24519 | 0.40559 | |
| 20 to 24 | Primary infertility | Low SDI | 0.159718757 | -0.10269 | 0.422822 | |
| 25 to 29 | Primary infertility | Low SDI | 0.290629761 | -0.00755 | 0.589697 | |
| 30 to 34 | Primary infertility | Low SDI | 0.755263626 | 0.360564 | 1.151515 | |
| 35 to 39 | Primary infertility | Low SDI | 1.351632692 | 0.808561 | 1.89763 | |
| 40 to 44 | Primary infertility | Low SDI | 1.729222903 | 0.94917 | 2.515303 | |
| 45 to 49 | Primary infertility | Low SDI | 1.846214666 | 0.242719 | 3.47536 | |
| 15 to 19 | Secondary infertility | Global | 1.90698522 | 1.65061 | 2.164007 | |
| 20 to 24 | Secondary infertility | Global | 1.610457207 | 1.444586 | 1.7766 | |
| 25 to 29 | Secondary infertility | Global | 1.41665541 | 1.282404 | 1.551085 | |
| 30 to 34 | Secondary infertility | Global | 1.213504725 | 1.091528 | 1.335628 | |
| 35 to 39 | Secondary infertility | Global | 1.028774751 | 0.901655 | 1.156055 | |
| 40 to 44 | Secondary infertility | Global | 0.827775748 | 0.669324 | 0.986477 | |
| 45 to 49 | Secondary infertility | Global | 0.650151121 | 0.346291 | 0.954932 | |
| 15 to 19 | Secondary infertility | High SDI | 0.255954024 | -0.41288 | 0.929283 | |
| 20 to 24 | Secondary infertility | High SDI | 0.429762682 | 0.134865 | 0.725528 | |
| 25 to 29 | Secondary infertility | High SDI | 0.498724992 | 0.285797 | 0.712105 | |
| 30 to 34 | Secondary infertility | High SDI | 0.588419976 | 0.414487 | 0.762655 | |
| 35 to 39 | Secondary infertility | High SDI | 0.612228282 | 0.447912 | 0.776814 | |
| 40 to 44 | Secondary infertility | High SDI | 0.47694067 | 0.282393 | 0.671866 | |
| 45 to 49 | Secondary infertility | High SDI | 0.198727394 | -0.16385 | 0.562619 | |
| 15 to 19 | Secondary infertility | High-middle SDI | 1.749683879 | 1.35589 | 2.145007 | |
| 20 to 24 | Secondary infertility | High-middle SDI | 1.85159124 | 1.618137 | 2.085582 | |
| 25 to 29 | Secondary infertility | High-middle SDI | 1.662164161 | 1.486094 | 1.83854 | |
| 30 to 34 | Secondary infertility | High-middle SDI | 1.535928504 | 1.381573 | 1.690519 | |
| 35 to 39 | Secondary infertility | High-middle SDI | 1.565093586 | 1.406251 | 1.724185 | |
| 40 to 44 | Secondary infertility | High-middle SDI | 1.483849174 | 1.290796 | 1.677271 | |
| 45 to 49 | Secondary infertility | High-middle SDI | 1.166727752 | 0.812829 | 1.521868 | |
| 15 to 19 | Secondary infertility | Middle SDI | 2.128505667 | 1.826955 | 2.430949 | |
| 20 to 24 | Secondary infertility | Middle SDI | 2.133342863 | 1.940743 | 2.326307 | |
| 25 to 29 | Secondary infertility | Middle SDI | 2.054216821 | 1.896146 | 2.212532 | |
| 30 to 34 | Secondary infertility | Middle SDI | 1.93252469 | 1.782962 | 2.082308 | |
| 35 to 39 | Secondary infertility | Middle SDI | 1.823760756 | 1.659493 | 1.988294 | |
| 40 to 44 | Secondary infertility | Middle SDI | 1.673083599 | 1.460222 | 1.886392 | |
| 45 to 49 | Secondary infertility | Middle SDI | 1.544638519 | 1.123284 | 1.967749 | |
| 15 to 19 | Secondary infertility | Low-middle SDI | 3.168744686 | 2.749992 | 3.589204 | |
| 20 to 24 | Secondary infertility | Low-middle SDI | 2.626033672 | 2.319323 | 2.933664 | |
| 25 to 29 | Secondary infertility | Low-middle SDI | 2.276332584 | 2.006904 | 2.546473 | |
| 30 to 34 | Secondary infertility | Low-middle SDI | 1.974885427 | 1.712878 | 2.237568 | |
| 35 to 39 | Secondary infertility | Low-middle SDI | 1.664546927 | 1.374555 | 1.955369 | |
| 40 to 44 | Secondary infertility | Low-middle SDI | 1.370318042 | 0.986434 | 1.755662 | |
| 45 to 49 | Secondary infertility | Low-middle SDI | 1.206883606 | 0.431151 | 1.988608 | |
| 15 to 19 | Secondary infertility | Low SDI | 2.147941609 | 1.86125 | 2.43544 | |
| 20 to 24 | Secondary infertility | Low SDI | 1.968748596 | 1.740942 | 2.197065 | |
| 25 to 29 | Secondary infertility | Low SDI | 1.753958532 | 1.542833 | 1.965523 | |
| 30 to 34 | Secondary infertility | Low SDI | 1.45155487 | 1.236536 | 1.66703 | |
| 35 to 39 | Secondary infertility | Low SDI | 1.10812885 | 0.863029 | 1.353824 | |
| 40 to 44 | Secondary infertility | Low SDI | 0.865019524 | 0.534489 | 1.196637 | |
| 45 to 49 | Secondary infertility | Low SDI | 0.505103663 | -0.18731 | 1.202322 | |
|  |  |  |  |  |  | |

| **eTable 8.** The results of BAPC model to predict the temporal trend in the number of prevalence cases and ASPR from 1990 to 2045. | | | | |
| --- | --- | --- | --- | --- |
| Type | pred_case_val | pred_low | pred_up | year |
| Infertility | 6315525.445 | 6297562.693 | 6333488.198 | 1990 |
| Infertility | 6490861.908 | 6472661.763 | 6509062.053 | 1991 |
| Infertility | 6655924.242 | 6637492.528 | 6674355.957 | 1992 |
| Infertility | 6821507.353 | 6802843.731 | 6840170.974 | 1993 |
| Infertility | 6984352.394 | 6965457.322 | 7003247.467 | 1994 |
| Infertility | 7151054.676 | 7131925.578 | 7170183.774 | 1995 |
| Infertility | 7337527.123 | 7318137.223 | 7356917.023 | 1996 |
| Infertility | 7556411.499 | 7536727.708 | 7576095.291 | 1997 |
| Infertility | 7793100.238 | 7773102.385 | 7813098.091 | 1998 |
| Infertility | 8022926.476 | 8002630.889 | 8043222.063 | 1999 |
| Infertility | 8232579.509 | 8212010.63 | 8253148.387 | 2000 |
| Infertility | 8429275.64 | 8408457.732 | 8450093.548 | 2001 |
| Infertility | 8641480.189 | 8620399.966 | 8662560.412 | 2002 |
| Infertility | 8857810.875 | 8836470.292 | 8879151.459 | 2003 |
| Infertility | 9069001.036 | 9047412.371 | 9090589.701 | 2004 |
| Infertility | 9262627.502 | 9240815.119 | 9284439.885 | 2005 |
| Infertility | 9445290.818 | 9423268.271 | 9467313.366 | 2006 |
| Infertility | 9630196.932 | 9607959.704 | 9652434.159 | 2007 |
| Infertility | 9819985.696 | 9797525.574 | 9842445.819 | 2008 |
| Infertility | 10013279.18 | 9990592.787 | 10035965.58 | 2009 |
| Infertility | 10197275.21 | 10174375.67 | 10220174.75 | 2010 |
| Infertility | 10392599.81 | 10369479.59 | 10415720.02 | 2011 |
| Infertility | 10604877.62 | 10581522.48 | 10628232.76 | 2012 |
| Infertility | 10820247.66 | 10796660.45 | 10843834.88 | 2013 |
| Infertility | 11022085.32 | 10998284.2 | 11045886.45 | 2014 |
| Infertility | 11195230.17 | 11171246.83 | 11219213.51 | 2015 |
| Infertility | 11385487.69 | 11361293.25 | 11409682.12 | 2016 |
| Infertility | 11623612.3 | 11599146.55 | 11648078.05 | 2017 |
| Infertility | 11870992.37 | 11846246.79 | 11895737.95 | 2018 |
| Infertility | 12088241.81 | 12063259 | 12113224.62 | 2019 |
| Infertility | 12344011.7 | 12318768.71 | 12369254.68 | 2020 |
| Infertility | 12465663.19 | 12440298.93 | 12491027.46 | 2021 |
| Infertility | 13057850.77 | 12575024.31 | 13540677.23 | 2022 |
| Infertility | 13291206.02 | 12707714.24 | 13874697.8 | 2023 |
| Infertility | 13529043.85 | 12798584 | 14259503.69 | 2024 |
| Infertility | 13770758.65 | 12851118.44 | 14690398.87 | 2025 |
| Infertility | 14016844.47 | 12869013.46 | 15164675.47 | 2026 |
| Infertility | 14269460.13 | 12856047.61 | 15682872.65 | 2027 |
| Infertility | 14524248 | 12811591.78 | 16236904.21 | 2028 |
| Infertility | 14779762.45 | 12736090.99 | 16823433.91 | 2029 |
| Infertility | 15037243.88 | 12630957.71 | 17443530.05 | 2030 |
| Infertility | 15298807.81 | 12497078.9 | 18100536.72 | 2031 |
| Infertility | 15569739.84 | 12337208.83 | 18802270.85 | 2032 |
| Infertility | 15839439.48 | 12143272.64 | 19535606.32 | 2033 |
| Infertility | 16108748.1 | 11915595.78 | 20301900.42 | 2034 |
| Infertility | 16382816.14 | 11657085.85 | 21108546.42 | 2035 |
| Infertility | 16667223.44 | 11369750.22 | 21964696.65 | 2036 |
| Infertility | 16971931.36 | 11057613.85 | 22886248.88 | 2037 |
| Infertility | 17287765.69 | 10712338.81 | 23863192.58 | 2038 |
| Infertility | 17614695.15 | 10331902.99 | 24897487.32 | 2039 |
| Infertility | 17955322.93 | 9915092.278 | 25995553.58 | 2040 |
| Infertility | 18312089.07 | 9459611.145 | 27164566.99 | 2041 |
| Infertility | 18690113.89 | 8963951.23 | 28416276.55 | 2042 |
| Infertility | 19088092.81 | 8422575.234 | 29753610.39 | 2043 |
| Infertility | 19503644.34 | 7830402.676 | 31176886 | 2044 |
| Infertility | 19936097.62 | 7182164.103 | 32690031.13 | 2045 |
| Primary infertility | 2074135.287 | 2064176.395 | 2084094.179 | 1990 |
| Primary infertility | 2135557.821 | 2125451.336 | 2145664.305 | 1991 |
| Primary infertility | 2192812.957 | 2182568.927 | 2203056.988 | 1992 |
| Primary infertility | 2245862.212 | 2235490.162 | 2256234.261 | 1993 |
| Primary infertility | 2295039.423 | 2284546.518 | 2305532.329 | 1994 |
| Primary infertility | 2341022.937 | 2330415.208 | 2351630.667 | 1995 |
| Primary infertility | 2386251.423 | 2375534.421 | 2396968.425 | 1996 |
| Primary infertility | 2430411.183 | 2419593.958 | 2441228.409 | 1997 |
| Primary infertility | 2474782.228 | 2463866.397 | 2485698.058 | 1998 |
| Primary infertility | 2519596.341 | 2508581.863 | 2530610.818 | 1999 |
| Primary infertility | 2565917.934 | 2554797.734 | 2577038.134 | 2000 |
| Primary infertility | 2617362.208 | 2606125.779 | 2628598.636 | 2001 |
| Primary infertility | 2674397.245 | 2663035.558 | 2685758.932 | 2002 |
| Primary infertility | 2732315.696 | 2720830.429 | 2743800.963 | 2003 |
| Primary infertility | 2786740.167 | 2775141.304 | 2798339.031 | 2004 |
| Primary infertility | 2832608.372 | 2820915.319 | 2844301.426 | 2005 |
| Primary infertility | 2871721.118 | 2859948.91 | 2883493.326 | 2006 |
| Primary infertility | 2909195.283 | 2897347.875 | 2921042.691 | 2007 |
| Primary infertility | 2946631.022 | 2934707.94 | 2958554.104 | 2008 |
| Primary infertility | 2983591.693 | 2971592.264 | 2995591.122 | 2009 |
| Primary infertility | 3016549.157 | 3004478.099 | 3028620.215 | 2010 |
| Primary infertility | 3041133.862 | 3028998.917 | 3053268.807 | 2011 |
| Primary infertility | 3057661.733 | 3045470.885 | 3069852.581 | 2012 |
| Primary infertility | 3071360.393 | 3059117.965 | 3083602.82 | 2013 |
| Primary infertility | 3087111.822 | 3074817.224 | 3099406.421 | 2014 |
| Primary infertility | 3111220.722 | 3098864.505 | 3123576.938 | 2015 |
| Primary infertility | 3156740.357 | 3144287.922 | 3169192.792 | 2016 |
| Primary infertility | 3222591.25 | 3210007.988 | 3235174.513 | 2017 |
| Primary infertility | 3292736.365 | 3280016.546 | 3305456.183 | 2018 |
| Primary infertility | 3350702.628 | 3337869.138 | 3363536.119 | 2019 |
| Primary infertility | 3407406.184 | 3394471.369 | 3420341 | 2020 |
| Primary infertility | 3452836.704 | 3439793.368 | 3465880.04 | 2021 |
| Primary infertility | 3599593.207 | 3271962.436 | 3927223.978 | 2022 |
| Primary infertility | 3655557.434 | 3297684.672 | 4013430.195 | 2023 |
| Primary infertility | 3712234.193 | 3311889.889 | 4112578.498 | 2024 |
| Primary infertility | 3769997.058 | 3314105.05 | 4225889.066 | 2025 |
| Primary infertility | 3829297.735 | 3304458.407 | 4354137.064 | 2026 |
| Primary infertility | 3890559.73 | 3283421.453 | 4497698.007 | 2027 |
| Primary infertility | 3953675.752 | 3251489.383 | 4655862.12 | 2028 |
| Primary infertility | 4018359.941 | 3208784.8 | 4827935.082 | 2029 |
| Primary infertility | 4084433.235 | 3155255.332 | 5013611.138 | 2030 |
| Primary infertility | 4151732.814 | 3090646.74 | 5212818.888 | 2031 |
| Primary infertility | 4220657.066 | 3014973.497 | 5426340.636 | 2032 |
| Primary infertility | 4288784.359 | 2926621.824 | 5650946.895 | 2033 |
| Primary infertility | 4357407.413 | 2826209.948 | 5888604.878 | 2034 |
| Primary infertility | 4427016.635 | 2713651.004 | 6140382.266 | 2035 |
| Primary infertility | 4498104.867 | 2588662.832 | 6407546.903 | 2036 |
| Primary infertility | 4572258.828 | 2451435.114 | 6693082.543 | 2037 |
| Primary infertility | 4646456.029 | 2299537.426 | 6993374.632 | 2038 |
| Primary infertility | 4722280.754 | 2133179.107 | 7311382.402 | 2039 |
| Primary infertility | 4800504.507 | 1951702.4 | 7649306.615 | 2040 |
| Primary infertility | 4881890.66 | 1754123.586 | 8009657.734 | 2041 |
| Primary infertility | 4967250.071 | 1539299.614 | 8395200.528 | 2042 |
| Primary infertility | 5057377.118 | 1305339.598 | 8809414.639 | 2043 |
| Primary infertility | 5151235.539 | 1057444.105 | 9252165.561 | 2044 |
| Primary infertility | 5249284.548 | 821124.2927 | 9726456.775 | 2045 |
| Secondary infertility | 4241398.654 | 4226694.438 | 4256102.871 | 1990 |
| Secondary infertility | 4355308.818 | 4340419.46 | 4370198.175 | 1991 |
| Secondary infertility | 4463119.067 | 4448046.989 | 4478191.145 | 1992 |
| Secondary infertility | 4575652.783 | 4560392.316 | 4590913.249 | 1993 |
| Secondary infertility | 4689319.429 | 4673867.063 | 4704771.795 | 1994 |
| Secondary infertility | 4810015.086 | 4794365.044 | 4825665.128 | 1995 |
| Secondary infertility | 4951256.027 | 4935374.651 | 4967137.403 | 1996 |
| Secondary infertility | 5126000.099 | 5109843.63 | 5142156.568 | 1997 |
| Secondary infertility | 5318335.968 | 5301880.503 | 5334791.432 | 1998 |
| Secondary infertility | 5503362.564 | 5486626.245 | 5520098.883 | 1999 |
| Secondary infertility | 5666681.075 | 5649695.361 | 5683666.788 | 2000 |
| Secondary infertility | 5811913.132 | 5794711.331 | 5829114.933 | 2001 |
| Secondary infertility | 5967079.418 | 5949652.312 | 5984506.524 | 2002 |
| Secondary infertility | 6125490.806 | 6107839.433 | 6143142.18 | 2003 |
| Secondary infertility | 6282262.396 | 6264393.78 | 6300131.012 | 2004 |
| Secondary infertility | 6430015.1 | 6411943.815 | 6448086.386 | 2005 |
| Secondary infertility | 6573558.916 | 6555289.642 | 6591828.189 | 2006 |
| Secondary infertility | 6720994.496 | 6702518.682 | 6739470.31 | 2007 |
| Secondary infertility | 6873356.355 | 6854664.393 | 6892048.318 | 2008 |
| Secondary infertility | 7029704.067 | 7010792.033 | 7048616.101 | 2009 |
| Secondary infertility | 7180757.695 | 7161636.825 | 7199878.564 | 2010 |
| Secondary infertility | 7351497.821 | 7332144.273 | 7370851.368 | 2011 |
| Secondary infertility | 7547237.218 | 7527617.072 | 7566857.364 | 2012 |
| Secondary infertility | 7748895.046 | 7729006.745 | 7768783.347 | 2013 |
| Secondary infertility | 7934964.43 | 7914835.796 | 7955093.064 | 2014 |
| Secondary infertility | 8083965.471 | 8063652.103 | 8104278.839 | 2015 |
| Secondary infertility | 8228701.786 | 8208205.119 | 8249198.453 | 2016 |
| Secondary infertility | 8401022.496 | 8380300.894 | 8421744.099 | 2017 |
| Secondary infertility | 8578292.582 | 8557341.628 | 8599243.535 | 2018 |
| Secondary infertility | 8737570.93 | 8716421.768 | 8758720.093 | 2019 |
| Secondary infertility | 8936667.869 | 8915284.308 | 8958051.431 | 2020 |
| Secondary infertility | 9012770.156 | 8991304.403 | 9034235.909 | 2021 |
| Secondary infertility | 9470117.673 | 8937525.705 | 10002709.64 | 2022 |
| Secondary infertility | 9652300.659 | 9040484.039 | 10264117.28 | 2023 |
| Secondary infertility | 9840830.985 | 9113337.513 | 10568324.46 | 2024 |
| Secondary infertility | 10035000.93 | 9156023.866 | 10913978 | 2025 |
| Secondary infertility | 10234896.42 | 9170240.735 | 11299552.11 | 2026 |
| Secondary infertility | 10441115.21 | 9158103.368 | 11724127.05 | 2027 |
| Secondary infertility | 10651033.85 | 9119562.029 | 12182505.67 | 2028 |
| Secondary infertility | 10864208.24 | 9055365.048 | 12673051.43 | 2029 |
| Secondary infertility | 11082219.99 | 8966902.666 | 13197537.32 | 2030 |
| Secondary infertility | 11307679.44 | 8855449.157 | 13759909.72 | 2031 |
| Secondary infertility | 11544813.47 | 8722919.775 | 14366707.16 | 2032 |
| Secondary infertility | 11787028.71 | 8563839.146 | 15010218.28 | 2033 |
| Secondary infertility | 12034529.1 | 8377261.213 | 15691796.99 | 2034 |
| Secondary infertility | 12292015.51 | 8164816.095 | 16419214.92 | 2035 |
| Secondary infertility | 12564924.47 | 7927531.676 | 17202317.27 | 2036 |
| Secondary infertility | 12860999.24 | 7666906.836 | 18055091.65 | 2037 |
| Secondary infertility | 13174794.46 | 7376253.625 | 18973335.29 | 2038 |
| Secondary infertility | 13504883.63 | 7051350.655 | 19958416.61 | 2039 |
| Secondary infertility | 13852667.58 | 6688911.142 | 21016424.02 | 2040 |
| Secondary infertility | 14219858.87 | 6284957.996 | 22154759.73 | 2041 |
| Secondary infertility | 14610364.39 | 5835832.364 | 23384896.41 | 2042 |
| Secondary infertility | 15022642.21 | 5334771.699 | 24710512.72 | 2043 |
| Secondary infertility | 15456790.16 | 4775919.582 | 26137660.74 | 2044 |
| Secondary infertility | 15912466.84 | 4152103.483 | 27672830.2 | 2045 |
| Type | pred_rate_val | pred_low | pred_up | year |
| Infertility | 475.537691 | 475.1642829 | 475.911099 | 1990 |
| Infertility | 478.245406 | 477.8756411 | 478.615171 | 1991 |
| Infertility | 480.8321525 | 480.4653713 | 481.1989338 | 1992 |
| Infertility | 483.4303556 | 483.0664414 | 483.7942698 | 1993 |
| Infertility | 486.4552334 | 486.0936469 | 486.8168199 | 1994 |
| Infertility | 489.4274848 | 489.068213 | 489.7867566 | 1995 |
| Infertility | 494.3605432 | 494.0024874 | 494.7185991 | 1996 |
| Infertility | 501.5553518 | 501.1975374 | 501.9131662 | 1997 |
| Infertility | 509.6006148 | 509.2427749 | 509.9584547 | 1998 |
| Infertility | 517.1087961 | 516.7510119 | 517.4665803 | 1999 |
| Infertility | 522.7883058 | 522.431287 | 523.1453247 | 2000 |
| Infertility | 527.5237588 | 527.1677606 | 527.879757 | 2001 |
| Infertility | 532.7632507 | 532.4081929 | 533.1183085 | 2002 |
| Infertility | 537.7960394 | 537.442072 | 538.1500067 | 2003 |
| Infertility | 542.1938073 | 541.8411435 | 542.5464711 | 2004 |
| Infertility | 545.4549684 | 545.1039028 | 545.8060339 | 2005 |
| Infertility | 548.1391754 | 547.7897826 | 548.4885681 | 2006 |
| Infertility | 551.1727824 | 550.8248088 | 551.5207561 | 2007 |
| Infertility | 554.7174033 | 554.3705629 | 555.0642437 | 2008 |
| Infertility | 558.653615 | 558.3076814 | 558.9995485 | 2009 |
| Infertility | 562.6308221 | 562.2855763 | 562.9760678 | 2010 |
| Infertility | 567.8058469 | 567.460713 | 568.1509807 | 2011 |
| Infertility | 574.3394887 | 573.9938879 | 574.6850895 | 2012 |
| Infertility | 581.4457182 | 581.0993329 | 581.7921034 | 2013 |
| Infertility | 588.142088 | 587.7949355 | 588.4892405 | 2014 |
| Infertility | 593.5376056 | 593.1899984 | 593.8852129 | 2015 |
| Infertility | 600.0002282 | 599.6517961 | 600.3486604 | 2016 |
| Infertility | 609.0533325 | 608.7032817 | 609.4033833 | 2017 |
| Infertility | 618.5254064 | 618.1736109 | 618.8772019 | 2018 |
| Infertility | 626.2322538 | 625.8792572 | 626.5852505 | 2019 |
| Infertility | 635.8340324 | 635.479316 | 636.1887489 | 2020 |
| Infertility | 638.154231 | 637.7997893 | 638.5086726 | 2021 |
| Infertility | 651.2952793 | 637.4300577 | 665.1605008 | 2022 |
| Infertility | 658.7063491 | 638.3295872 | 679.083111 | 2023 |
| Infertility | 666.260595 | 637.4432993 | 695.0778907 | 2024 |
| Infertility | 673.9763003 | 635.1715345 | 712.781066 | 2025 |
| Infertility | 681.9195395 | 631.7163486 | 732.1227303 | 2026 |
| Infertility | 690.2442325 | 627.2575362 | 753.2309288 | 2027 |
| Infertility | 698.7991478 | 621.7548822 | 775.8434133 | 2028 |
| Infertility | 707.4997568 | 615.1761178 | 799.8233957 | 2029 |
| Infertility | 716.3526201 | 607.5249784 | 825.1802619 | 2030 |
| Infertility | 725.3986668 | 598.7935201 | 852.0038136 | 2031 |
| Infertility | 734.7692052 | 589.0325235 | 880.5058869 | 2032 |
| Infertility | 744.3402195 | 578.1526907 | 910.5277482 | 2033 |
| Infertility | 754.0520605 | 566.1003672 | 942.0037538 | 2034 |
| Infertility | 763.9177655 | 552.8541485 | 974.9813824 | 2035 |
| Infertility | 773.9655217 | 538.3764361 | 1009.554607 | 2036 |
| Infertility | 784.318245 | 522.6848674 | 1045.951623 | 2037 |
| Infertility | 794.9178814 | 505.7179244 | 1084.117838 | 2038 |
| Infertility | 805.7410533 | 487.4263728 | 1124.055734 | 2039 |
| Infertility | 816.8059901 | 467.7698399 | 1165.84214 | 2040 |
| Infertility | 828.1215758 | 446.6822377 | 1209.560914 | 2041 |
| Infertility | 839.7774118 | 424.1355473 | 1255.419276 | 2042 |
| Infertility | 851.7324379 | 400.060835 | 1303.404041 | 2043 |
| Infertility | 863.9428535 | 374.3820191 | 1353.503688 | 2044 |
| Infertility | 876.3836223 | 347.0246255 | 1405.742619 | 2045 |
| Primary infertility | 148.6776361 | 148.4740877 | 148.8811845 | 1990 |
| Primary infertility | 150.3794659 | 150.1768047 | 150.5821271 | 1991 |
| Primary infertility | 151.9331978 | 151.7313142 | 152.1350815 | 1992 |
| Primary infertility | 153.2452736 | 153.0442478 | 153.4462994 | 1993 |
| Primary infertility | 154.46597 | 154.2656836 | 154.6662563 | 1994 |
| Primary infertility | 155.4621027 | 155.2626484 | 155.6615571 | 1995 |
| Primary infertility | 156.5257285 | 156.3269213 | 156.7245358 | 1996 |
| Primary infertility | 157.5596493 | 157.3614337 | 157.7578649 | 1997 |
| Primary infertility | 158.5486362 | 158.3510424 | 158.7462301 | 1998 |
| Primary infertility | 159.5058853 | 159.3089158 | 159.7028547 | 1999 |
| Primary infertility | 160.4202356 | 160.2239573 | 160.6165138 | 2000 |
| Primary infertility | 161.579516 | 161.3837774 | 161.7752546 | 2001 |
| Primary infertility | 162.9390986 | 162.7438299 | 163.1343672 | 2002 |
| Primary infertility | 164.1738937 | 163.9792416 | 164.3685458 | 2003 |
| Primary infertility | 165.0335896 | 164.8398337 | 165.2273455 | 2004 |
| Primary infertility | 165.2866189 | 165.0941354 | 165.4791024 | 2005 |
| Primary infertility | 165.1272732 | 164.9362763 | 165.31827 | 2006 |
| Primary infertility | 164.9475922 | 164.7580182 | 165.1371663 | 2007 |
| Primary infertility | 164.8791252 | 164.6908207 | 165.0674298 | 2008 |
| Primary infertility | 164.9371561 | 164.7499445 | 165.1243677 | 2009 |
| Primary infertility | 165.0618679 | 164.8755403 | 165.2481955 | 2010 |
| Primary infertility | 165.0115601 | 164.8260528 | 165.1970673 | 2011 |
| Primary infertility | 164.7163371 | 164.5316713 | 164.9010028 | 2012 |
| Primary infertility | 164.4577097 | 164.2737492 | 164.6416702 | 2013 |
| Primary infertility | 164.4864039 | 164.3028815 | 164.6699263 | 2014 |
| Primary infertility | 165.1172023 | 164.9336921 | 165.3007124 | 2015 |
| Primary infertility | 166.9960147 | 166.8117612 | 167.1802683 | 2016 |
| Primary infertility | 170.0023183 | 169.8166731 | 170.1879636 | 2017 |
| Primary infertility | 173.2480589 | 173.0608896 | 173.4352282 | 2018 |
| Primary infertility | 175.7996462 | 175.61136 | 175.9879324 | 2019 |
| Primary infertility | 178.223973 | 178.0346674 | 178.4132786 | 2020 |
| Primary infertility | 179.8446066 | 179.6548037 | 180.0344094 | 2021 |
| Primary infertility | 183.0484092 | 174.2380375 | 191.858781 | 2022 |
| Primary infertility | 185.0312459 | 174.2483465 | 195.8141454 | 2023 |
| Primary infertility | 186.9947432 | 173.5710805 | 200.4184058 | 2024 |
| Primary infertility | 188.9495912 | 172.2968528 | 205.6023296 | 2025 |
| Primary infertility | 190.9079558 | 170.495511 | 211.3204007 | 2026 |
| Primary infertility | 192.8809358 | 168.2153387 | 217.5465329 | 2027 |
| Primary infertility | 194.8617585 | 165.4884615 | 224.2350555 | 2028 |
| Primary infertility | 196.8461492 | 162.3300456 | 231.3622527 | 2029 |
| Primary infertility | 198.8353847 | 158.7473265 | 238.9234429 | 2030 |
| Primary infertility | 200.8311973 | 154.7401417 | 246.9222529 | 2031 |
| Primary infertility | 202.8368703 | 150.3082048 | 255.3655358 | 2032 |
| Primary infertility | 204.8424545 | 145.4507439 | 264.234165 | 2033 |
| Primary infertility | 206.8411178 | 140.1643321 | 273.5179036 | 2034 |
| Primary infertility | 208.8308962 | 134.4452161 | 283.2165763 | 2035 |
| Primary infertility | 210.8114604 | 128.288199 | 293.3347218 | 2036 |
| Primary infertility | 212.7874459 | 121.6915567 | 303.8833352 | 2037 |
| Primary infertility | 214.7603747 | 114.6572241 | 314.8635252 | 2038 |
| Primary infertility | 216.7344946 | 107.1855206 | 326.2834686 | 2039 |
| Primary infertility | 218.7165845 | 99.27526514 | 338.1579039 | 2040 |
| Primary infertility | 220.7123964 | 90.92240276 | 350.50239 | 2041 |
| Primary infertility | 222.7279238 | 82.12249851 | 363.3333491 | 2042 |
| Primary infertility | 224.7649496 | 72.87209062 | 376.6578086 | 2043 |
| Primary infertility | 226.8232365 | 63.1648433 | 390.4816297 | 2044 |
| Primary infertility | 228.9031388 | 52.99337399 | 404.8129037 | 2045 |
| Secondary infertility | 326.8617 | 326.5485 | 327.1749 | 1990 |
| Secondary infertility | 327.8662 | 327.5566 | 328.1758 | 1991 |
| Secondary infertility | 328.899 | 328.5924 | 329.2055 | 1992 |
| Secondary infertility | 330.1848 | 329.8812 | 330.4884 | 1993 |
| Secondary infertility | 331.9888 | 331.6875 | 332.2901 | 1994 |
| Secondary infertility | 333.9635 | 333.6644 | 334.2626 | 1995 |
| Secondary infertility | 337.8331 | 337.535 | 338.1311 | 1996 |
| Secondary infertility | 343.9957 | 343.6975 | 344.2938 | 1997 |
| Secondary infertility | 351.0535 | 350.7549 | 351.352 | 1998 |
| Secondary infertility | 357.6056 | 357.3067 | 357.9045 | 1999 |
| Secondary infertility | 362.3699 | 362.0715 | 362.6683 | 2000 |
| Secondary infertility | 365.9447 | 365.6471 | 366.2422 | 2001 |
| Secondary infertility | 369.824 | 369.5273 | 370.1208 | 2002 |
| Secondary infertility | 373.6216 | 373.3258 | 373.9175 | 2003 |
| Secondary infertility | 377.1597 | 376.8649 | 377.4546 | 2004 |
| Secondary infertility | 380.1673 | 379.8735 | 380.4611 | 2005 |
| Secondary infertility | 383.0105 | 382.7177 | 383.3032 | 2006 |
| Secondary infertility | 386.2241 | 385.9321 | 386.5161 | 2007 |
| Secondary infertility | 389.8379 | 389.5464 | 390.1293 | 2008 |
| Secondary infertility | 393.7171 | 393.426 | 394.0081 | 2009 |
| Secondary infertility | 397.5705 | 397.2797 | 397.8613 | 2010 |
| Secondary infertility | 402.796 | 402.5047 | 403.0872 | 2011 |
| Secondary infertility | 409.6243 | 409.332 | 409.9166 | 2012 |
| Secondary infertility | 416.9884 | 416.6948 | 417.2821 | 2013 |
| Secondary infertility | 423.6552 | 423.3603 | 423.95 | 2014 |
| Secondary infertility | 428.418 | 428.1226 | 428.7134 | 2015 |
| Secondary infertility | 433.0017 | 432.7058 | 433.2976 | 2016 |
| Secondary infertility | 439.0508 | 438.7539 | 439.3477 | 2017 |
| Secondary infertility | 445.2788 | 444.9808 | 445.5768 | 2018 |
| Secondary infertility | 450.4337 | 450.135 | 450.7324 | 2019 |
| Secondary infertility | 457.613 | 457.3129 | 457.9131 | 2020 |
| Secondary infertility | 458.3064 | 458.0071 | 458.6058 | 2021 |
| Secondary infertility | 468.6289 | 454.1139 | 483.144 | 2022 |
| Secondary infertility | 474.313 | 454.5463 | 494.0798 | 2023 |
| Secondary infertility | 480.2782 | 453.6035 | 506.9529 | 2024 |
| Secondary infertility | 486.5345 | 451.5826 | 521.4865 | 2025 |
| Secondary infertility | 493.131 | 448.6648 | 537.5972 | 2026 |
| Secondary infertility | 500.1434 | 444.9749 | 555.312 | 2027 |
| Secondary infertility | 507.4937 | 440.5075 | 574.4799 | 2028 |
| Secondary infertility | 515.1267 | 435.2331 | 595.0203 | 2029 |
| Secondary infertility | 523.0425 | 429.1367 | 616.9483 | 2030 |
| Secondary infertility | 531.2862 | 422.2138 | 640.3586 | 2031 |
| Secondary infertility | 539.9388 | 414.4771 | 665.4004 | 2032 |
| Secondary infertility | 548.9366 | 405.8594 | 692.0138 | 2033 |
| Secondary infertility | 558.2409 | 396.2973 | 720.1846 | 2034 |
| Secondary infertility | 567.8576 | 385.7428 | 749.9724 | 2035 |
| Secondary infertility | 577.8219 | 374.1504 | 781.4935 | 2036 |
| Secondary infertility | 588.2092 | 361.4923 | 814.926 | 2037 |
| Secondary infertility | 598.9692 | 347.6859 | 850.2525 | 2038 |
| Secondary infertility | 610.0604 | 332.6456 | 887.4752 | 2039 |
| Secondary infertility | 621.4636 | 316.2892 | 926.638 | 2040 |
| Secondary infertility | 633.1708 | 298.5303 | 967.8113 | 2041 |
| Secondary infertility | 645.227 | 279.3063 | 1011.148 | 2042 |
| Secondary infertility | 657.6042 | 258.5392 | 1056.669 | 2043 |
| Secondary infertility | 670.2791 | 236.1477 | 1104.41 | 2044 |
| Secondary infertility | 683.2349 | 212.0476 | 1154.422 | 2045 |
|  |  |  |  |  |

| **eTable 9** The results of decomposition analysis globally and in various SDI regions from 1990 to 2021. | | | | | | | | |  | |  |
| --- | --- | --- | --- | --- | --- | --- | --- | --- | --- | --- | --- |
| location | sex | | cause | | rei | measure | Overll difference | Aging | | Population | Epidemiological change |
| Global | | Female | Endometriosis | Infertility | | Prevalence | 6150002.67 | 58563.15(0.95%) | 3402776.34(55.33%) | | 2688663.18(43.72%) |
| High SDI | | Female | Endometriosis | Infertility | | Prevalence | 651849.9 | -7913.54(-1.21%) | 175714.69(26.96%) | | 484048.75(74.26%) |
| High-middle SDI | | Female | Endometriosis | Infertility | | Prevalence | 816076.24 | 709.62(0.09%) | 147849.59(18.12%) | | 667517.02(81.8%) |
| Middle SDI | | Female | Endometriosis | Infertility | | Prevalence | 2576284.38 | -10501(-0.41%) | 994032.37(38.58%) | | 1592753.01(61.82%) |
| Low-middle SDI | | Female | Endometriosis | Infertility | | Prevalence | 1548208.49 | 4304.4(0.28%) | 879583.19(56.81%) | | 664320.91(42.91%) |
| Low SDI | | Female | Endometriosis | Infertility | | Prevalence | 553254.01 | -569.46(-0.1%) | 393002.83(71.03%) | | 160820.64(29.07%) |
| Global | | Female | Endometriosis | Primary infertility | | Prevalence | 1378722.2 | -164186.67(-1.91%) | 1019170.32(73.92%) | | 523738.54(37.99%) |
| High SDI | | Female | Endometriosis | Primary infertility | | Prevalence | 128736.61 | -44644.54(-34.68%) | 59595.99(46.29%) | | 113785.16(88.39%) |
| High-middle SDI | | Female | Endometriosis | Primary infertility | | Prevalence | 125287.87 | -56972.89(-45.47%) | 37183.73(29.68%) | | 145077.04(115.79%) |
| Middle SDI | | Female | Endometriosis | Primary infertility | | Prevalence | 571095.59 | -101179.18(-7.72%) | 275511.57(48.24%) | | 396763.2(69.47%) |
| Low-middle SDI | | Female | Endometriosis | Primary infertility | | Prevalence | 405679.35 | -20637.2(-5.09%) | 291185.85(71.78%) | | 135130.7(33.31%) |
| Low SDI | | Female | Endometriosis | Primary infertility | | Prevalence | 146897.82 | -914.4(-0.62%) | 115825.47(78.85%) | | 31986.7521.77%) |
| Global | | Female | Endometriosis | Secondary infertility | | Prevalence | 4771280.48 | 222749.82(4.67%) | 2383606.01(49.96%) | | 2164924.64(45.37%) |
| High SDI | | Female | Endometriosis | Secondary infertility | | Prevalence | 523113.29 | 36731(7.02%) | 116118.7(22.2%) | | 370263.6(70.78%) |
| High-middle SDI | | Female | Endometriosis | Secondary infertility | | Prevalence | 690788.37 | 57682.51(8.35%) | 110665.86(16.02%) | | 522439.99(75.63%) |
| Middle SDI | | Female | Endometriosis | Secondary infertility | | Prevalence | 2005188.8 | 90678.18(4.52%) | 718520.8(35.83%) | | 1195989.81(59.64%) |
| Low-middle SDI | | Female | Endometriosis | Secondary infertility | | Prevalence | 1142529.14 | 24941.6(2.18%) | 588397.34(51.5%) | | 529190.2(46.32%) |
| Low SDI | | Female | Endometriosis | Secondary infertility | | Prevalence | 406356.19 | 344.94(0.08%) | 277177.35(68.21%) | | 128833.9(31.7%) |

| **eTable 10.** The concentration index of the cross-country inequality analysis | | | | | |  |
| --- | --- | --- | --- | --- | --- | --- |
| Type | year | Concentration_index | uci | lci | SE | P |
| Infertility | 1990 | 0.24714656 | 0.298254 | 0.196039 | 0.026075 | <0.001 |
| Infertility | 2021 | 0.19094327 | 0.229966 | 0.151921 | 0.01991 | <0.001 |
| Primary infertility | 1990 | 0.3000209 | 0.36376 | 0.236282 | 0.03252 | <0.001 |
| Primary infertility | 2021 | 0.21957272 | 0.273661 | 0.165484 | 0.027596 | <0.001 |
| Secondary infertility | 1990 | 0.22245591 | 0.274122 | 0.170789 | 0.02636 | <0.001 |
| Secondary infertility | 2021 | 0.17937797 | 0.217098 | 0.141658 | 0.019245 | <0.001 |
|  |  |  |  |  |  |  |

| **eTable 11.** The slope index of the cross-country inequality analysis | | | | | |
| --- | --- | --- | --- | --- | --- |
| Type | year | value | lower | upper | P |
| Infertility | 1990 | 257.9504 | 199.6504 | 316.2504 | <0.001 |
| Primary infertility | 1990 | 257.9504 | 199.6504 | 316.2504 | <0.001 |
| Secondary infertility | 1990 | 257.9504 | 199.6504 | 316.2504 | <0.001 |
| Infertility | 2021 | 324.1287 | 242.934 | 405.3234 | <0.001 |
| Primary infertility | 2021 | 324.1287 | 242.934 | 405.3234 | <0.001 |
| Secondary infertility | 2021 | 324.1287 | 242.934 | 405.3234 | <0.001 |
