# Supplementary material for: Global Trends and Burden of Infertility Attributable to Polycystic Ovary Syndrome, 1990–2021: A Comprehensive Analysis from the Global Burden of Disease Study
Source: Research Square preprint supplement (doi:10.21203/rs.3.rs-6881341/v1), 2025-07-19
Supplement: Supplementary file 2 [file a2ad4446df1f804895c6141e.docx]

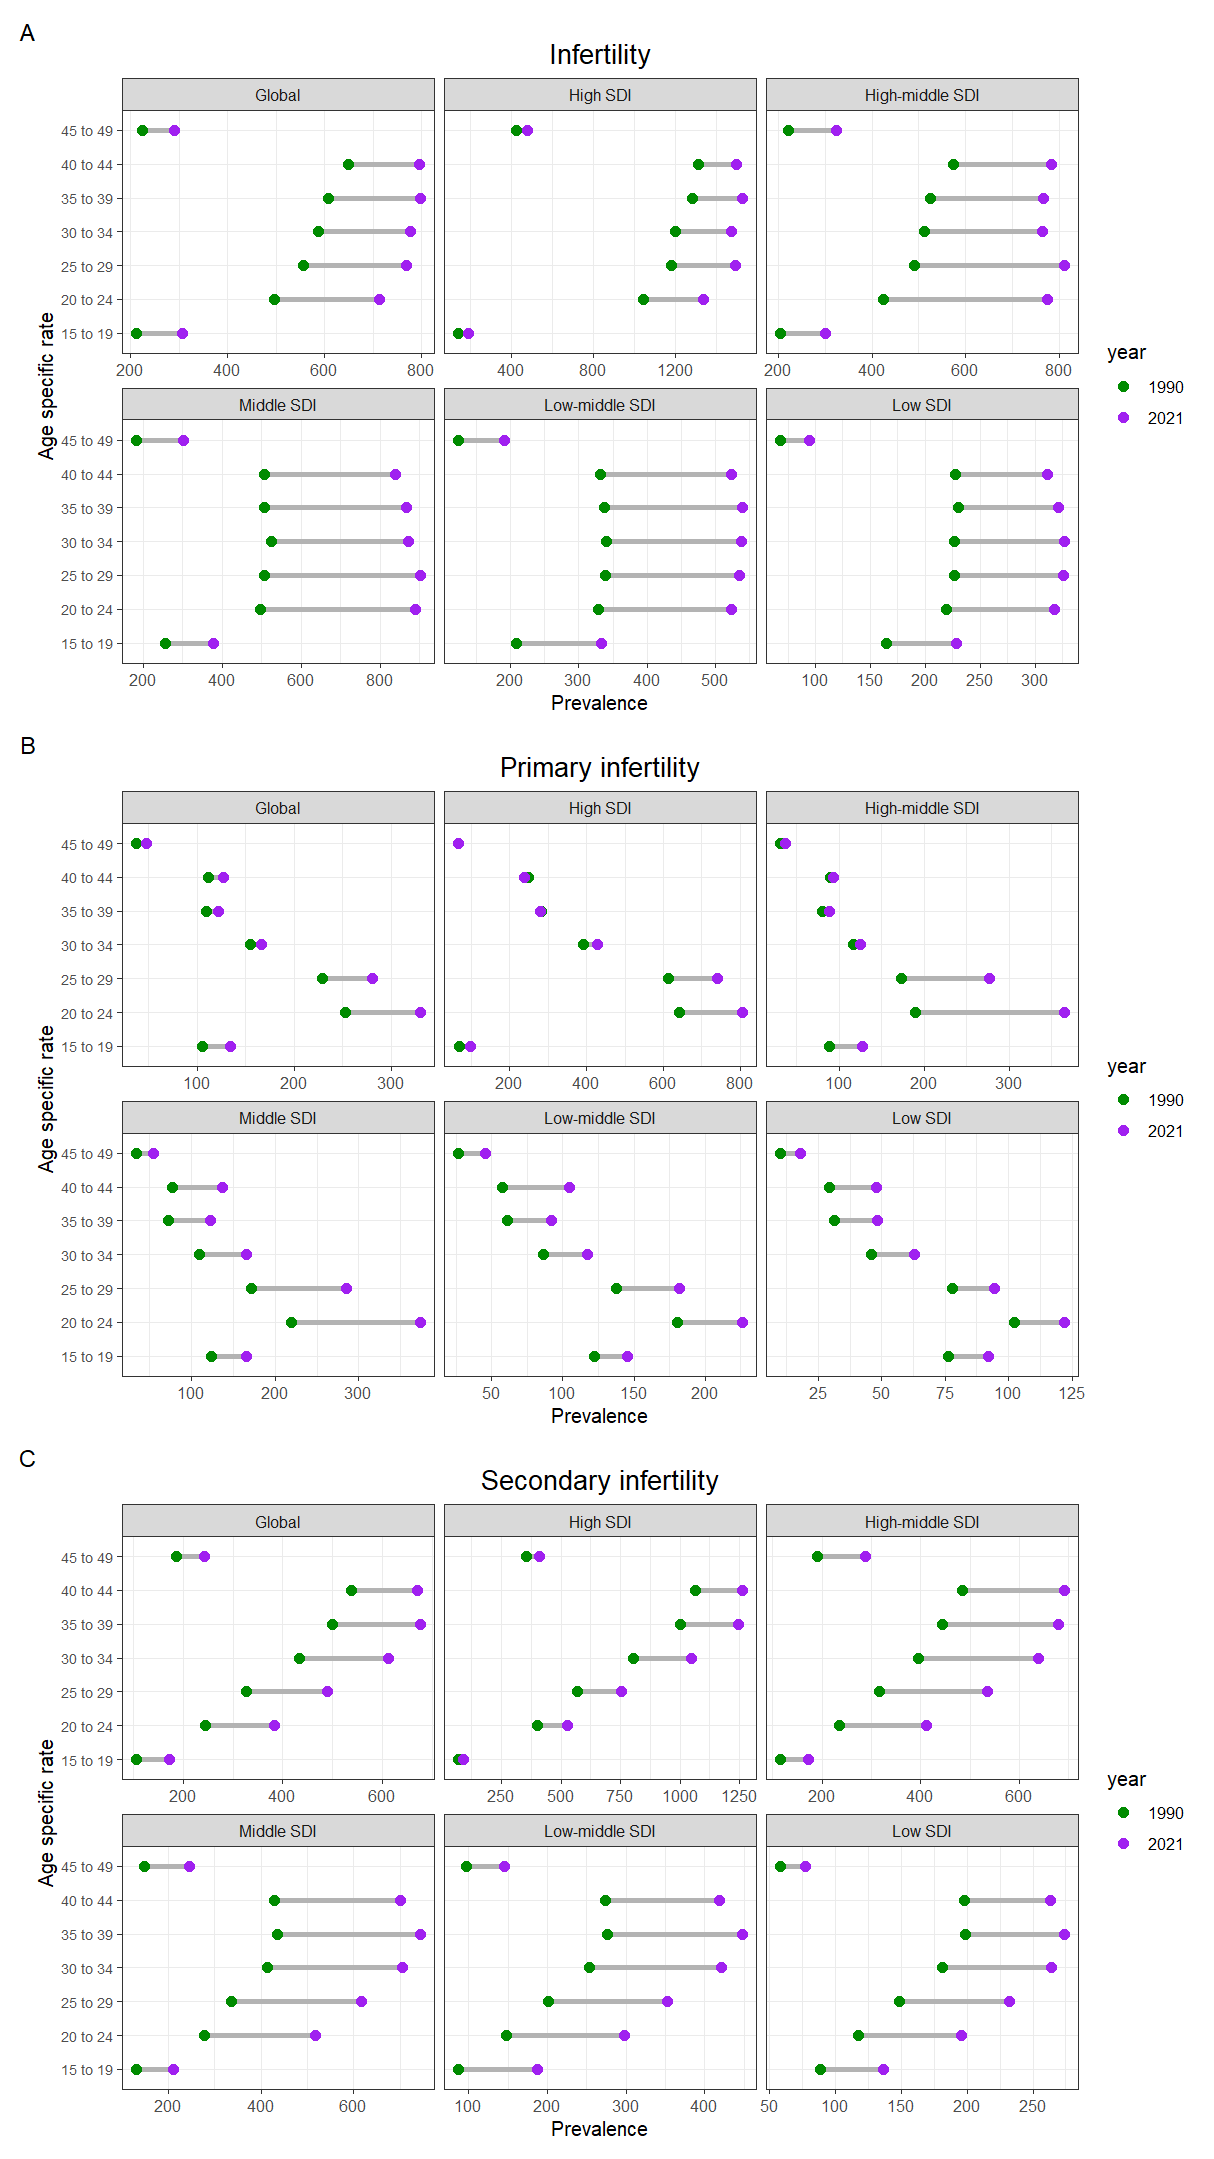


**eFigure 1**. The age-standardized prevalence rates for infertility due to PCOS among different age groups (15–49 years) of different SDI regions in 1990 and 2021. (A) Infertility. (B) Primary infertility. (C) Secondary infertility.


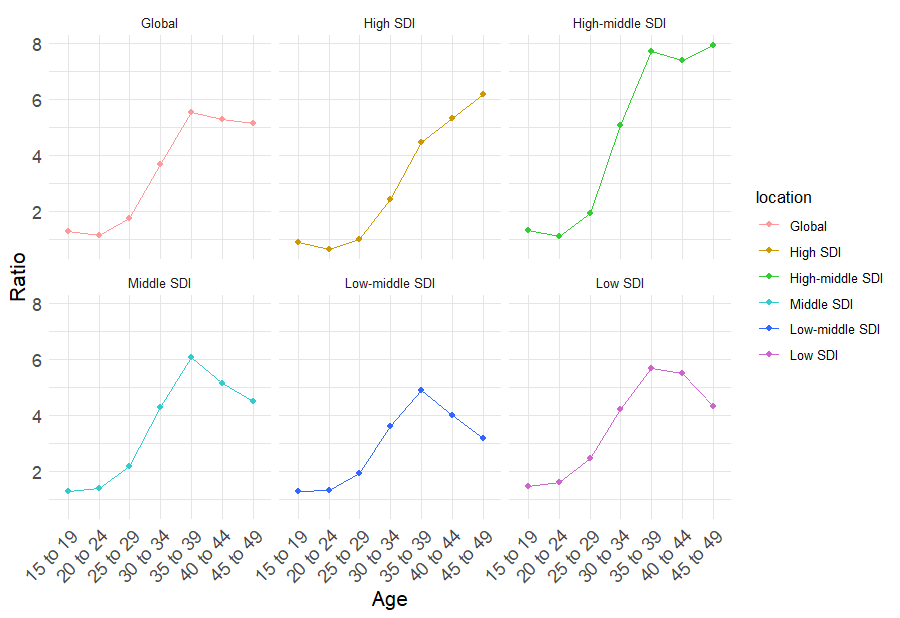


**eFigure 2**. The ratio of secondary infertility to primary infertility attributable to PCOS prevalence in 2021.


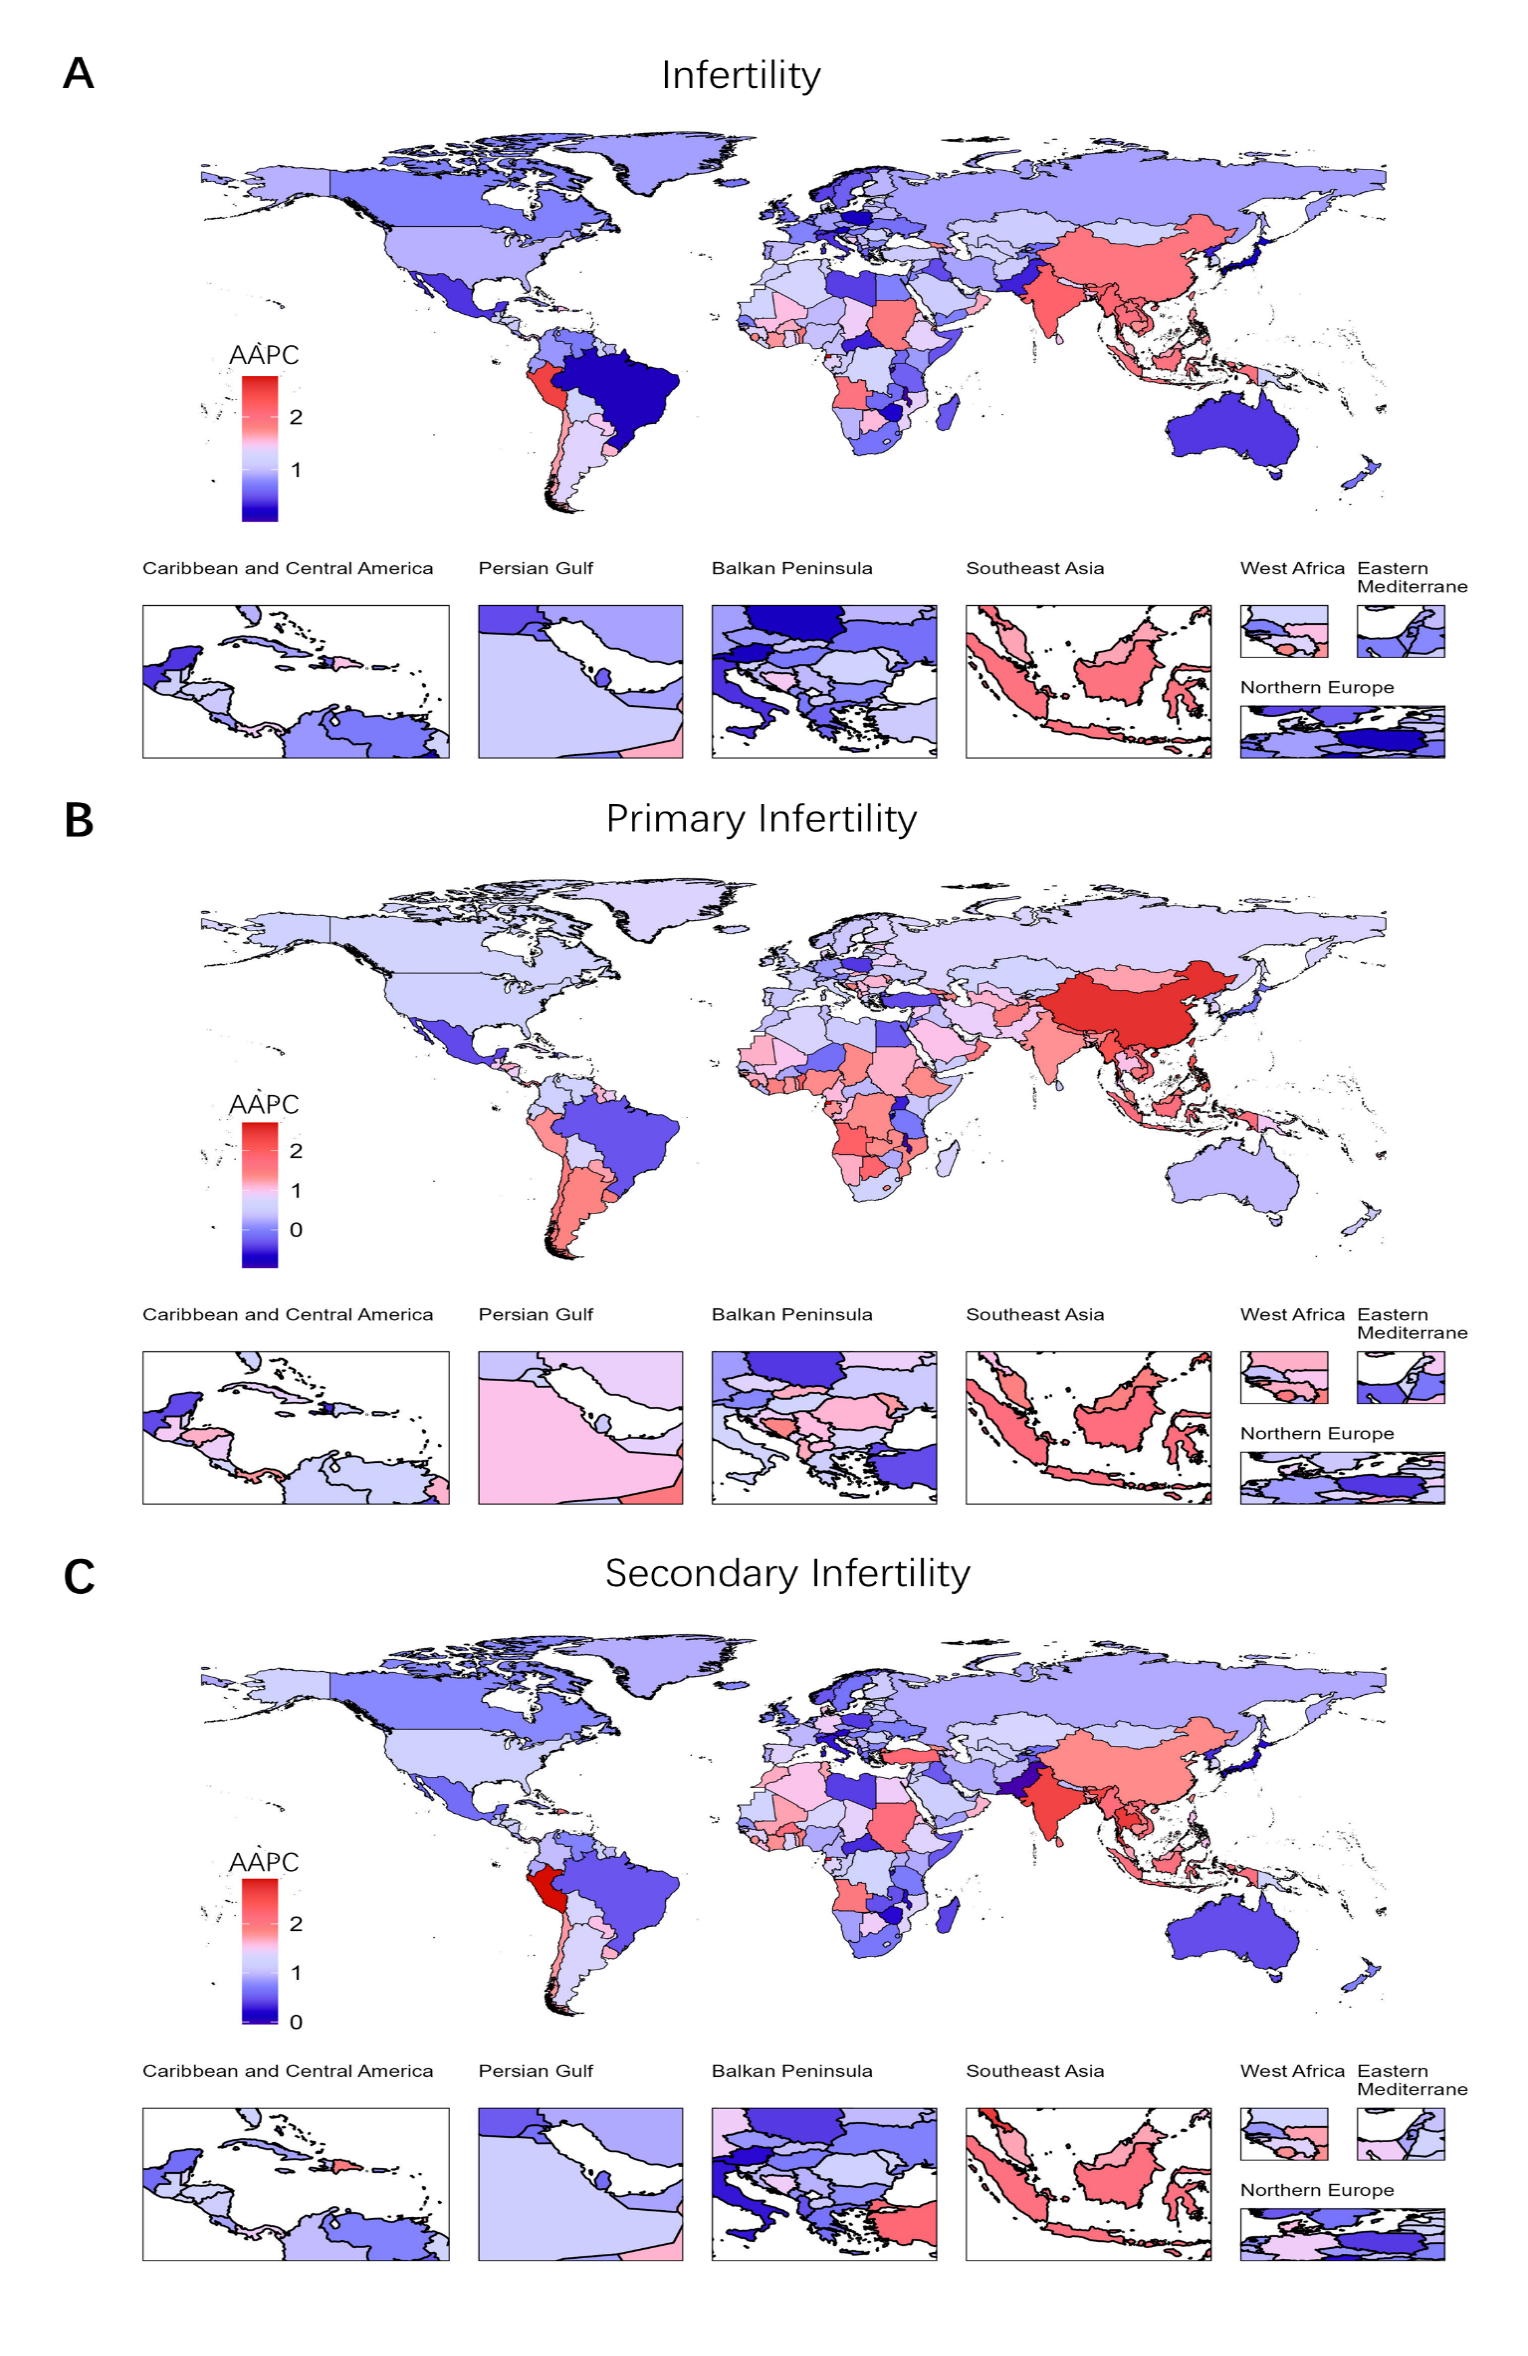


**eFigure 3**. Global map of average annual percentage changes(AAPCs) from 1990 to 2021 for infertility due to PCOS. (A) Infertility. (B) Primary infertility. (C) Secondary infertility.


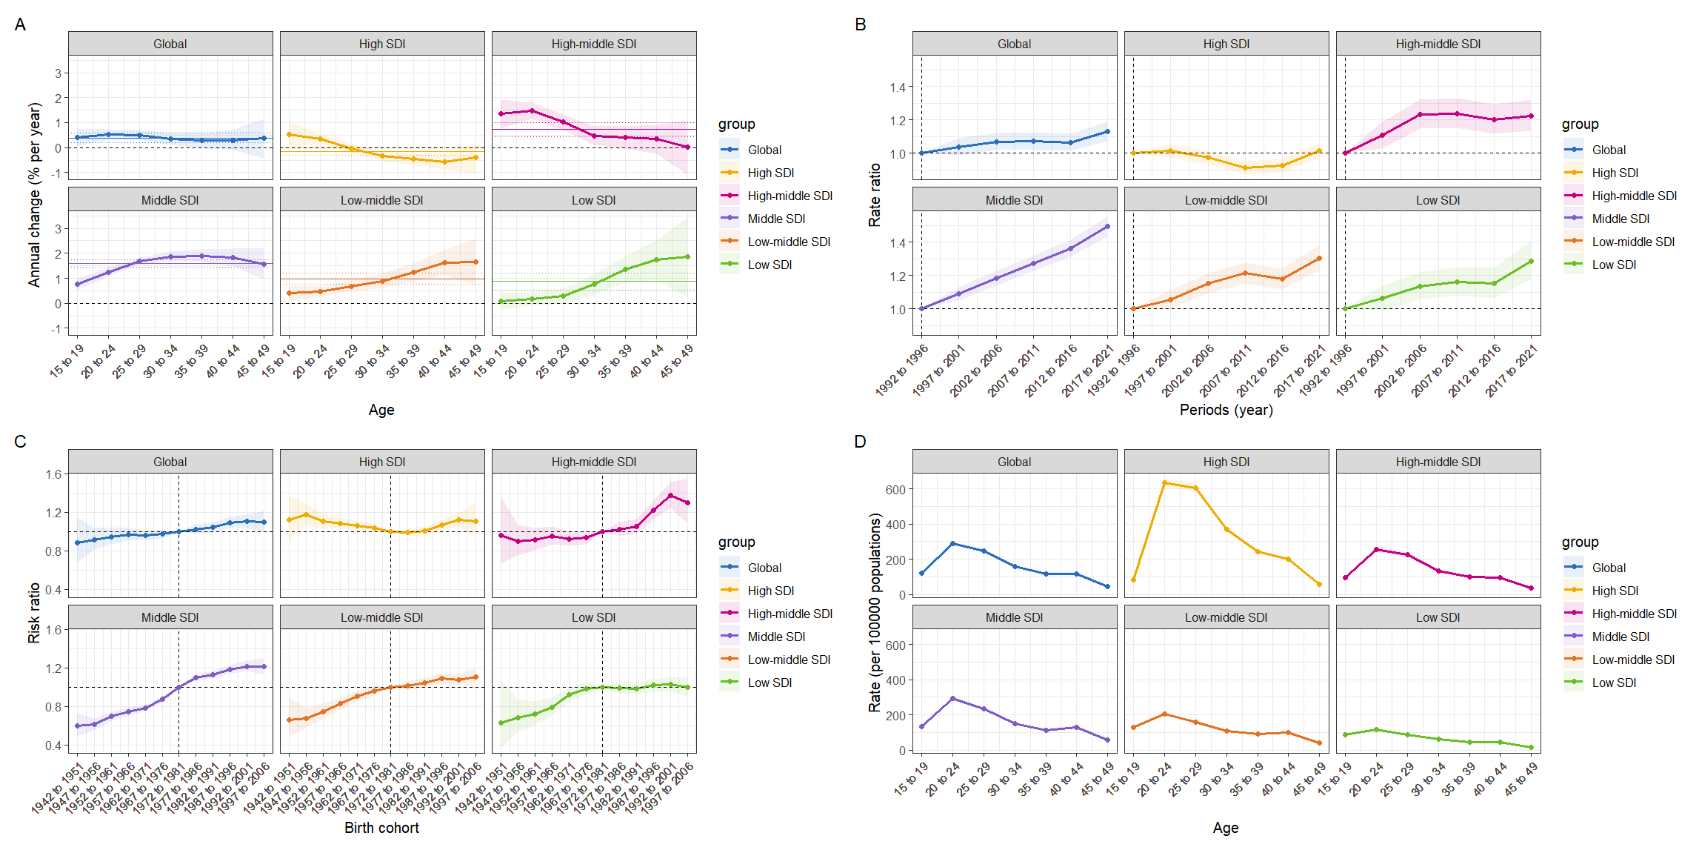


**eFigure 4.** Age, period and birth cohort effects on primary infertility due to the prevalence of PCOS across SDI quintiles. (A) Local drift for each age group illustrated by annual change. (B) Period effects illustrated by the period relative risk. (C) Birth cohort effects illustrated by the cohort relative risk. (D) Age effects illustrated by the fitted longitudinal age-­specific rates.


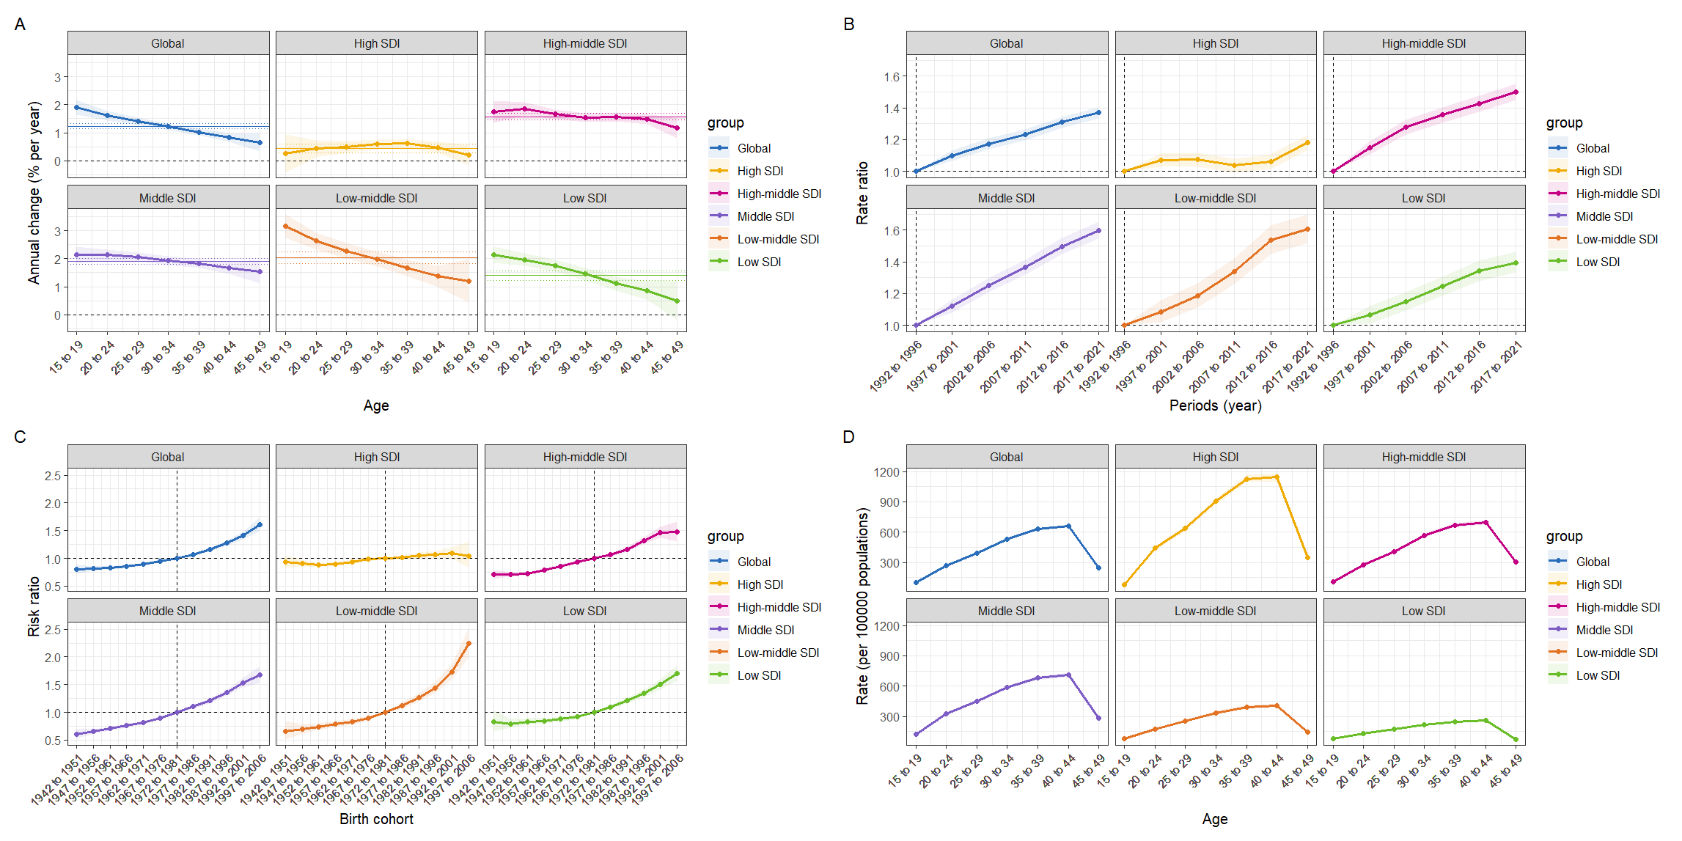


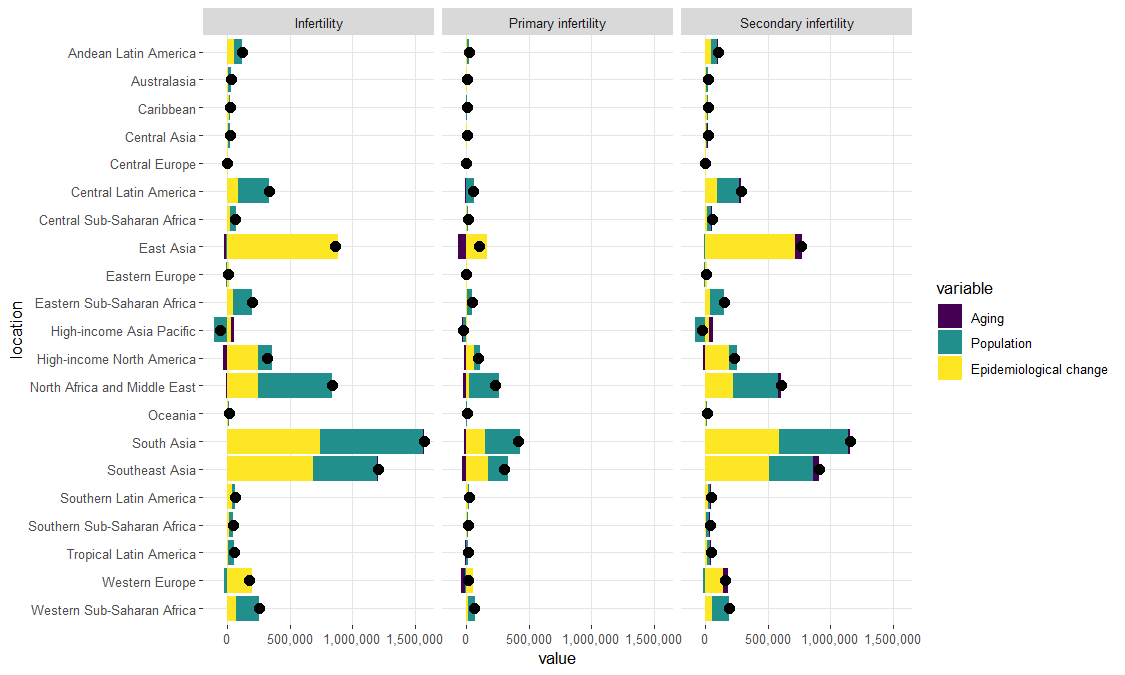
**eFigure 5.** Age, period and birth cohort effects on secondary infertility due to the prevalence of PCOS across SDI quintiles. (A) Local drift for each age group illustrated by annual change. (B) Period effects illustrated by the period relative risk. (C) Birth cohort effects illustrated by the cohort relative risk. (D) Age effects illustrated by the fitted longitudinal age-­specific rates.

**eFigure 6.** Population-level determinant changes in aging, population growth, and epidemiological changes for infertility due to PCOS prevalence globally and in 21 regions from 1990 to 2021. The black dots indicate the net total change in disease burden, aligning with the sum of both components.
